# Supplementary material for: Discovery of plasma biomarkers for predicting the severity of coronary artery atherosclerosis by quantitative proteomics
Source: PubMed Central journal article supplement — BMJ Open Diabetes Res Care. 2020 Apr 22;8(1):e001152. doi: 10.1136/bmjdrc-2019-001152 (PMC7202779; doi:10.1136/bmjdrc-2019-001152), 2020-04-22

## Supplemental Data

### Discovery of Plasma Biomarkers for Predicting the Severity of Coronary Artery Atherosclerosis by Quantitative Proteomics

Eu Jeong Ku\*, Kyung-Cho Cho\*, Cheong Lim, Jeong Won Kang, Jae Won Oh, Yu Ri Choi, Jong-Moon Park, Na-Young Han, Jong Jin Oh, Tae Jung Oh, Hak Chul Jang, Hookeun Lee<sup>†</sup>, Kwang Pyo Kim<sup>†</sup>, Sung Hee Choi<sup>†</sup>

\* E.J.K. and K.C.C contributed equally to this work.

## Contents

**Table S1.** Clinical characteristics of the subjects for the discovery cohort ( $n = 18$ )

**Table S2.** Baseline characteristics of the subjects for verification cohort ( $n = 53$ )

**Table S3.** List of identified proteins

**Table S4.** List of differentially expressed proteins (DEPs) obtained from the TMT quantitative analysis of patients without diabetes

**Table S5.** List of differentially expressed proteins (DEPs) obtained from the TMT quantitative analysis of patients with diabetes

**Table S6.** Transition list for the selected reaction monitoring analysis (SRM) in verification cohort

**Table S7.** Information list of transition and elute time for the selected reaction monitoring analysis (SRM) in validation cohort

**Figure S1.** Quantification of candidate biomarkers via label-free multiple reaction monitoring (MRM) analysis for verification of differentially expressed proteins

**Figure S2.** Validation of the selected biomarkers of coronary artery stenosis via multiple reaction monitoring (MRM) analysis with isotopically labeled peptides

**Table S1.** Clinical characteristics of the subjects for the discovery cohort ( $n = 18$ )

|                                       | Normal ( $n = 6$ ) | Mild-to-moderate stenosis ( $n = 6$ ) | Severe stenosis ( $n = 6$ ) | <i>P</i> value |
|---------------------------------------|--------------------|---------------------------------------|-----------------------------|----------------|
| Age (years)                           | 55.2 ± 8.4         | 54.8 ± 13.7                           | 47.3 ± 20.4                 | 0.801          |
| Male (%)                              | 6 (100)            | 6 (100)                               | 6 (100)                     |                |
| BMI (kg/m <sup>2</sup> )              | 27.5 ± 2.9         | 24.5 ± 1.9                            | 24.8 ± 1.5                  | 0.248          |
| Systolic blood pressure (mmHg)        | 120.1 ± 8.8        | 127.0 ± 12.7                          | 117.0 ± 25.5                | 0.439          |
| HbA1c (%)                             | 5.6 ± 0.6          | 6.1 ± 0.6                             | 5.9 ± 0.7                   | 0.341          |
| Total cholesterol (mg/dL)             | 187.3 ± 39.3       | 214.0 ± 35.5                          | 202.4 ± 44.7                | 0.620          |
| Triglyceride (mg/dL)                  | 128.3 ± 29.8       | 125.5 ± 45.7                          | 151.2 ± 55.5                | 0.586          |
| HDL-C (mg/dL)                         | 50.5 ± 15.3        | 59.7 ± 15.8                           | 58.0 ± 7.6                  | 0.141          |
| LDL-C (mg/dL)                         | 101.5 ± 31.2       | 112.2 ± 20.4                          | 102.6 ± 38.8                | 0.823          |
| AST (IU/L)                            | 22.2 ± 4.0         | 26.7 ± 10.5                           | 23.5 ± 2.4                  | 0.807          |
| ALT (IU/L)                            | 25.5 ± 5.8         | 32.8 ± 18.0                           | 24.8 ± 9.3                  | 0.469          |
| MDRD GFR (mL/min/1.73m <sup>2</sup> ) | 73.2 ± 7.4         | 75.8 ± 15.9                           | 76.4 ± 7.6                  | 0.862          |

Data are presented as the mean ± SD. BMI, body mass index; HDL-C, high density lipoprotein cholesterol; LDL-C, low density lipoprotein cholesterol; MDRD GFR, Modification of Diet in Renal Disease glomerular filtration rate; hsCRP, high-sensitivity C reactive protein. hsCRP was analyzed by log-transformation.

**Table S2.** Baseline characteristics of the subjects for verification cohort ( $n = 53$ )

|                                       | Normal ( $n = 19$ ) | Mild-to-moderate stenosis ( $n = 21$ ) | Severe stenosis ( $n = 13$ ) | <i>P</i> value |
|---------------------------------------|---------------------|----------------------------------------|------------------------------|----------------|
| Age (years)                           | 51.2 ± 7.7          | 53.5 ± 10.5                            | 59.1 ± 10.5                  | 0.172          |
| Male (%)                              | 11 (57.9)           | 17 (81.0)                              | 9 (69.2)                     | 0.284          |
| BMI (kg/m <sup>2</sup> )              | 24.4 ± 2.7          | 26.3 ± 4.1                             | 24.9 ± 1.5                   | 0.264          |
| Systolic blood pressure (mmHg)        | 121.0 ± 4.4         | 129.8 ± 15.8                           | 123.4 ± 13.5                 | 0.527          |
| HbA1c (%)                             | 5.7 ± 0.7           | 5.8 ± 0.5                              | 6.0 ± 0.6                    | 0.472          |
| Total cholesterol (mg/dL)             | 192.5 ± 35.8        | 208.5 ± 28.6                           | 199.6 ± 46.6                 | 0.416          |
| Triglyceride (mg/dL)                  | 124.4 ± 101.9       | 137.2 ± 53.0                           | 140.6 ± 44.6                 | 0.834          |
| HDL-C (mg/dL)                         | 56.3 ± 14.7         | 57.1 ± 14.2                            | 56.7 ± 9.7                   | 0.985          |
| LDL-C (mg/dL)                         | 99.6 ± 26.8         | 110.6 ± 19.6                           | 108.1 ± 32.8                 | 0.434          |
| AST (IU/L)                            | 26.2 ± 8.5          | 24.1 ± 7.2                             | 22.3 ± 2.1                   | 0.425          |
| ALT (IU/L)                            | 28.7 ± 13.1         | 24.3 ± 13.7                            | 22.4 ± 8.3                   | 0.441          |
| MDRD GFR (mL/min/1.73m <sup>2</sup> ) | 72.4 ± 7.9          | 79.0 ± 15.0                            | 76.6 ± 8.5                   | 0.253          |

Data are presented as the mean ± SD. BMI, body mass index; HDL-C, high density lipoprotein cholesterol; LDL-C, low density lipoprotein cholesterol; MDRD GFR, Modification of Diet in Renal Disease glomerular filtration rate; hsCRP, high-sensitivity C reactive protein. hsCRP was analyzed by log-transformation.

**Table S3.** List of identified proteins

| Protein                                                   | Gene     | Protein identification Probability, % |       | Exclusive unique peptide count |     | Exclusive unique spectrum count |     | Exclusive spectrum count |     | Percentage sequence coverage, % |      |
|-----------------------------------------------------------|----------|---------------------------------------|-------|--------------------------------|-----|---------------------------------|-----|--------------------------|-----|---------------------------------|------|
|                                                           |          | 1st                                   | 2nd   | 1st                            | 2nd | 1st                             | 2nd | 1st                      | 2nd | 1st                             | 2nd  |
| Isoform 4 of Probable helicase senataxin                  | SETX     | 100.0                                 | 100.0 | 2                              | 2   | 2                               | 2   | 2                        | 2   | 0.8                             | 0.6  |
| Isoform 2 of Inter-alpha-trypsin inhibitor heavy chain H3 | ITIH3    | 100.0                                 | 100.0 | 10                             | 9   | 18                              | 18  | 34                       | 41  | 16.6                            | 14.7 |
| Profilin-1                                                | PFN1     | 100.0                                 | 100.0 | 7                              | 6   | 8                               | 11  | 10                       | 17  | 59.3                            | 49.3 |
| Transforming acidic coiled-coil-containing protein 2      | TACC2    | 100.0                                 | NA    | 2                              | NA  | 2                               | NA  | 2                        | NA  | 0.0                             | NA   |
| Transformation/transcription domain-associated protein    | TRRAP    | 100.0                                 | 100.0 | 2                              | 3   | 2                               | 3   | 2                        | 3   | 0.0                             | 0.0  |
| Platelet glycoprotein V                                   | GP5      | 100.0                                 | 100.0 | 6                              | 6   | 7                               | 7   | 13                       | 12  | 12.9                            | 12.9 |
| Afamin                                                    | AFM      | 100.0                                 | 100.0 | 26                             | 25  | 51                              | 48  | 255                      | 238 | 45.9                            | 45.4 |
| Isoform 2 of Cordon-bleu protein-like 1                   | COBLL1   | 100.0                                 | 100.0 | 2                              | 3   | 2                               | 3   | 2                        | 4   | 3.8                             | 5.0  |
| Testis-expressed sequence 15 protein                      | TEX15    | 100.0                                 | NA    | 3                              | NA  | 3                               | NA  | 3                        | NA  | 1.7                             | NA   |
| Isoform 2 of Rho GTPase-activating protein 20             | ARHGAP20 | 100.0                                 | NA    | 2                              | NA  | 2                               | NA  | 2                        | NA  | 1.6                             | NA   |
| Antithrombin-III                                          | SERPINC1 | 100.0                                 | 100.0 | 26                             | 28  | 68                              | 70  | 1037                     | 907 | 53.7                            | 54.3 |
| E3 ubiquitin-protein ligase MARCH4                        | MARCH4   | 100.0                                 | NA    | 2                              | NA  | 2                               | NA  | 2                        | NA  | 0.0                             | NA   |
| Keratin, type I cytoskeletal 14                           | KRT14    | 100.0                                 | 100.0 | 16                             | 18  | 22                              | 20  | 32                       | 28  | 37.9                            | 43.6 |
| Exocyst complex component 8                               | EXOC8    | 100.0                                 | NA    | 2                              | NA  | 2                               | NA  | 2                        | NA  | 3.2                             | NA   |
| Serine/threonine-protein kinase TAO1                      | TAOK1    | 100.0                                 | NA    | 2                              | NA  | 2                               | NA  | 3                        | NA  | 0.0                             | NA   |
| Isoform 2 of Leucine-rich repeat-containing protein 16A   | LRRC16A  | 100.0                                 | NA    | 2                              | NA  | 2                               | NA  | 2                        | NA  | 0.0                             | NA   |
| Dystonin                                                  | DST      | 100.0                                 | NA    | 3                              | NA  | 3                               | NA  | 4                        | NA  | 0.4                             | NA   |

|                                                                             |          |       |       |    |    |    |    |     |     |      |      |
|-----------------------------------------------------------------------------|----------|-------|-------|----|----|----|----|-----|-----|------|------|
| Pigment epithelium-derived factor                                           | SERPINF1 | 100.0 | 100.0 | 14 | 14 | 28 | 30 | 134 | 133 | 37.6 | 37.6 |
| Galectin-3-binding protein                                                  | LGALS3BP | 100.0 | 100.0 | 13 | 13 | 17 | 15 | 40  | 33  | 26.7 | 29.6 |
| Plastin-2                                                                   | LCP1     | 100.0 | 100.0 | 13 | 13 | 14 | 15 | 15  | 18  | 27.9 | 27.4 |
| Chromodomain-helicase-DNA-binding protein 3                                 | CHD3     | 100.0 | 100.0 | 2  | 2  | 2  | 2  | 2   | 2   | 0.0  | 0.0  |
| Synaptojanin-1                                                              | SYNJ1    | 100.0 | 100.0 | 3  | 2  | 3  | 2  | 3   | 2   | 2.2  | 1.6  |
| Isoform 2 of Protein FAM134B                                                | FAM134B  | 99.9  | 99.9  | 2  | 2  | 2  | 2  | 3   | 3   | 6.5  | 6.5  |
| Probable phospholipid-transporting ATPase VD                                | ATP10D   | 100.0 | NA    | 3  | NA | 3  | NA | 3   | NA  | 2.6  | NA   |
| Protein diaphanous homolog 1                                                | DIAPH1   | 100.0 | NA    | 2  | NA | 2  | NA | 2   | NA  | 0.0  | NA   |
| Nidogen-1                                                                   | NID1     | 100.0 | 100.0 | 2  | 2  | 2  | 2  | 2   | 2   | 0.0  | 2.0  |
| Isoform 4 of Mannan-binding lectin serine protease 1                        | MASP1    | 100.0 | 100.0 | 4  | 3  | 5  | 4  | 11  | 8   | 24.6 | 21.2 |
| NEO1 protein                                                                | NEO1     | 100.0 | 100.0 | 2  | 2  | 2  | 3  | 3   | 3   | 2.5  | 2.0  |
| DNA (cytosine-5)-methyltransferase 3A                                       | DNMT3A   | 100.0 | NA    | 2  | NA | 2  | NA | 2   | NA  | 0.0  | NA   |
| Isoform 2 of Leucine-rich repeats and immunoglobulin-like domains protein 3 | LRIG3    | 100.0 | NA    | 2  | NA | 2  | NA | 2   | NA  | 2.5  | NA   |
| Complement factor D                                                         | CFD      | 100.0 | 100.0 | 7  | 7  | 9  | 8  | 16  | 14  | 45.8 | 45.8 |
| PDZ domain-containing protein 2                                             | PDZD2    | 100.0 | NA    | 2  | NA | 2  | NA | 2   | NA  | 0.9  | NA   |
| Isoform 2 of DNA helicase MCM8                                              | MCM8     | 100.0 | NA    | 2  | NA | 2  | NA | 3   | NA  | 3.0  | NA   |
| Protein Daple                                                               | CCDC88C  | 100.0 | 100.0 | 3  | 2  | 3  | 2  | 3   | 2   | 0.0  | 0.8  |
| Unconventional myosin-XVIIIa                                                | MYO18A   | 100.0 | NA    | 2  | NA | 2  | NA | 2   | NA  | 0.0  | NA   |
| PRAME family member 16                                                      | PRAMEF16 | 100.0 | 100.0 | 3  | 2  | 3  | 2  | 3   | 2   | 8.0  | 5.5  |
| Isoform 2 of Apolipoprotein L1                                              | APOL1    | 100.0 | 100.0 | 10 | 11 | 13 | 15 | 26  | 28  | 20.5 | 31.4 |
| Isoform 2 of Putative RNA-binding protein 15                                | RBM15    | 100.0 | NA    | 2  | NA | 2  | NA | 25  | NA  | 3.3  | NA   |

|                                                   |          |       |       |    |    |    |    |     |     |      |      |
|---------------------------------------------------|----------|-------|-------|----|----|----|----|-----|-----|------|------|
| Phosducin-like protein                            | PDCL     | 100.0 | NA    | 2  | NA | 2  | NA | 2   | NA  | 9.6  | NA   |
| Proteasome activator complex subunit 4            | PSME4    | 100.0 | NA    | 4  | NA | 4  | NA | 4   | NA  | 3.0  | NA   |
| Integrin beta-2                                   | ITGB2    | 100.0 | NA    | 2  | NA | 2  | NA | 2   | NA  | 5.3  | NA   |
| Isoform 10 of ARF GTPase-activating protein GIT2  | GIT2     | 100.0 | 100.0 | 2  | 2  | 2  | 2  | 4   | 2   | 2.8  | 2.9  |
| Liprin-alpha-2                                    | PPFIA2   | 100.0 | 100.0 | 2  | 2  | 2  | 2  | 3   | 2   | 0.0  | 0.0  |
| Low-density lipoprotein receptor (Fragment)       | LDLR     | 99.9  | NA    | 2  | NA | 2  | NA | 2   | NA  | 2.5  | NA   |
| Transthyretin                                     | TTR      | 100.0 | 100.0 | 7  | 7  | 18 | 17 | 598 | 575 | 68.7 | 68.7 |
| Isoform 4 of Clusterin                            | CLU      | 100.0 | 100.0 | 19 | 19 | 34 | 32 | 204 | 199 | 42.3 | 35.1 |
| Teneurin-3                                        | TENM3    | 100.0 | NA    | 3  | NA | 3  | NA | 4   | NA  | 0.0  | NA   |
| Thrombospondin type-1 domain-containing protein 4 | THSD4    | 100.0 | NA    | 2  | NA | 2  | NA | 2   | NA  | 0.0  | NA   |
| Unconventional myosin-XVIIIb                      | MYO18B   | 100.0 | NA    | 2  | NA | 2  | NA | 3   | NA  | 0.0  | NA   |
| Differentially expressed in FDCP 6 homolog        | DEF6     | 100.0 | NA    | 2  | NA | 2  | NA | 2   | NA  | 0.0  | NA   |
| Ras-related protein Rab-3A                        | RAB3A    | 100.0 | 100.0 | 2  | 2  | 2  | 2  | 3   | 5   | 0.0  | 10.9 |
| Multiple PDZ domain protein                       | MPDZ     | 100.0 | NA    | 3  | NA | 3  | NA | 3   | NA  | 1.4  | NA   |
| Keratin, type I cytoskeletal 17                   | KRT17    | 100.0 | 100.0 | 2  | 6  | 2  | 6  | 2   | 6   | 24.5 | 35.2 |
| CD5 antigen-like                                  | CD5L     | 100.0 | 100.0 | 3  | 3  | 3  | 3  | 5   | 6   | 9.8  | 12.1 |
| Isoform 4 of Protein unc-80 homolog               | UNC80    | 100.0 | NA    | 2  | NA | 2  | NA | 2   | NA  | 0.0  | NA   |
| Rho GTPase-activating protein 10                  | ARHGAP10 | 99.9  | NA    | 2  | NA | 2  | NA | 2   | NA  | 4.1  | NA   |
| Unconventional myosin-Va                          | MYO5A    | 100.0 | NA    | 2  | NA | 2  | NA | 2   | NA  | 2.1  | NA   |

|                                                                  |          |       |       |    |    |     |     |     |     |      |      |
|------------------------------------------------------------------|----------|-------|-------|----|----|-----|-----|-----|-----|------|------|
| DNA mismatch repair protein Msh2                                 | MSH2     | 100.0 | NA    | 2  | NA | 2   | NA  | 2   | NA  | 0.0  | NA   |
| Vitamin K-dependent protein S                                    | PROS1    | 100.0 | 100.0 | 19 | 17 | 26  | 25  | 65  | 60  | 34.8 | 34.3 |
| ADNP homeobox protein 2                                          | ADNP2    | 100.0 | NA    | 2  | NA | 2   | NA  | 3   | NA  | 0.0  | NA   |
| Sestrin-1                                                        | SESN1    | 100.0 | NA    | 2  | NA | 2   | NA  | 2   | NA  | 6.3  | NA   |
| Isoform 3 of Deducator of cytokinesis protein 9                  | DOCK9    | 100.0 | 100.0 | 2  | 2  | 2   | 2   | 2   | 2   | 0.0  | 1.6  |
| Neurogenic locus notch homolog protein 2                         | NOTCH2   | 100.0 | NA    | 2  | NA | 2   | NA  | 2   | NA  | 1.3  | NA   |
| Tenascin-X                                                       | TNXB     | 100.0 | 100.0 | 3  | 6  | 3   | 6   | 3   | 8   | 0.0  | 2.1  |
| Ceruloplasmin                                                    | CP       | 100.0 | 100.0 | 46 | 45 | 105 | 104 | 758 | 731 | 50.1 | 45.7 |
| Isoform 3 of Transmembrane protein 209                           | TMEM209  | 100.0 | NA    | 2  | NA | 3   | NA  | 4   | NA  | 9.3  | NA   |
| Nicotinate phosphoribosyltransferase                             | NAPRT1   | 99.9  | NA    | 2  | NA | 2   | NA  | 2   | NA  | 4.9  | NA   |
| TBC1 domain family member 12                                     | TBC1D12  | 100.0 | NA    | 2  | NA | 2   | NA  | 3   | NA  | 2.8  | NA   |
| Isoform 4 of Inactive ubiquitin carboxyl-terminal hydrolase 54   | USP54    | 100.0 | 100.0 | 2  | 2  | 2   | 2   | 2   | 2   | 0.0  | 1.5  |
| Serotransferrin                                                  | TF       | 100.0 | 100.0 | 11 | 10 | 11  | 10  | 13  | 11  | 20.2 | 18.1 |
| Isoform 2 of Protein prune homolog 2                             | PRUNE2   | 100.0 | NA    | 2  | NA | 2   | NA  | 2   | NA  | 0.0  | NA   |
| C4b-binding protein alpha chain                                  | C4BPA    | 100.0 | 100.0 | 21 | 21 | 34  | 35  | 106 | 110 | 46.6 | 46.6 |
| XK-related protein 7                                             | XKR7     | 100.0 | NA    | 2  | NA | 2   | NA  | 3   | NA  | 6.6  | NA   |
| Heparin cofactor 2                                               | SERPIND1 | 100.0 | 100.0 | 14 | 13 | 25  | 25  | 132 | 141 | 32.5 | 32.1 |
| FERM and PDZ domain-containing protein 4                         | FRMPD4   | 100.0 | 100.0 | 3  | 2  | 3   | 2   | 3   | 2   | 3.2  | 1.7  |
| Transient receptor potential cation channel subfamily V member 5 | TRPV5    | 100.0 | NA    | 2  | NA | 2   | NA  | 3   | NA  | 0.0  | NA   |



|                                                                      |          |       |       |    |    |    |    |     |     |      |      |
|----------------------------------------------------------------------|----------|-------|-------|----|----|----|----|-----|-----|------|------|
| Corticosteroid-binding globulin                                      | SERPINA6 | 100.0 | 100.0 | 6  | 6  | 10 | 10 | 29  | 35  | 16.8 | 16.8 |
| Fibrillin-3                                                          | FBN3     | 100.0 | 100.0 | 4  | 2  | 4  | 2  | 5   | 4   | 0.0  | 0.0  |
| Keratin, type II cytoskeletal 1b                                     | KRT77    | 100.0 | 100.0 | 2  | 4  | 2  | 4  | 2   | 4   | 6.9  | 12.5 |
| Keratin, type I cytoskeletal 10                                      | KRT10    | 100.0 | 100.0 | 28 | 29 | 53 | 53 | 187 | 195 | 52.6 | 49.5 |
| Ig gamma-3 chain C region                                            | IGHG3    | 100.0 | 100.0 | 3  | 4  | 4  | 5  | 5   | 5   | 8.0  | 13.3 |
| Phosphatidylinositol-glycan-specific phospholipase D                 | GPLD1    | 100.0 | 100.0 | 15 | 18 | 20 | 23 | 40  | 47  | 23.2 | 26.2 |
| Isoform 3 of Zinc finger protein 462                                 | ZNF462   | 100.0 | 100.0 | 2  | 2  | 2  | 2  | 7   | 6   | 0.0  | 0.0  |
| Hepatocyte growth factor-like protein alpha chain                    | MST1     | 100.0 | 100.0 | 11 | 12 | 14 | 14 | 24  | 22  | 18.2 | 21.0 |
| Isoform H7 of Myeloperoxidase                                        | MPO      | 100.0 | 100.0 | 3  | 5  | 3  | 5  | 3   | 5   | 5.4  | 10.6 |
| Isoform 2 of Tropomyosin alpha-4 chain                               | TPM4     | 100.0 | 100.0 | 2  | 3  | 2  | 3  | 2   | 5   | 10.2 | 12.5 |
| DENN domain-containing protein 4C                                    | DENND4C  | 100.0 | 100.0 | 2  | 3  | 2  | 3  | 2   | 5   | 0.0  | 0.0  |
| Isoform 3 of Calcium-binding mitochondrial carrier protein SCaMC-3   | SLC25A23 | 100.0 | NA    | 2  | NA | 2  | NA | 2   | NA  | 4.4  | NA   |
| Mucin-16                                                             | MUC16    | 100.0 | 100.0 | 3  | 3  | 3  | 4  | 13  | 16  | 0.0  | 0.0  |
| Isoform 3 of Myosin-10                                               | MYH10    | 100.0 | NA    | 2  | NA | 2  | NA | 3   | NA  | 1.6  | NA   |
| Protein FAM83B                                                       | FAM83B   | 100.0 | NA    | 2  | NA | 2  | NA | 5   | NA  | 0.0  | NA   |
| Serum paraoxonase/lactonase 3                                        | PON3     | 100.0 | 100.0 | 3  | 3  | 3  | 3  | 3   | 4   | 12.7 | 12.1 |
| Eukaryotic translation initiation factor 4 gamma 1                   | EIF4G1   | 100.0 | NA    | 2  | NA | 2  | NA | 2   | NA  | 1.8  | NA   |
| Leucine-rich repeat-containing protein 8E                            | LRRC8E   | 100.0 | 100.0 | 2  | 2  | 2  | 2  | 2   | 3   | 6.3  | 0.0  |
| Ankyrin-2                                                            | ANK2     | 100.0 | NA    | 2  | NA | 2  | NA | 2   | NA  | 0.0  | NA   |
| Protein S100-A9                                                      | S100A9   | 100.0 | 100.0 | 7  | 5  | 9  | 7  | 27  | 24  | 81.6 | 50.0 |
| Isoform 2 of Multiple epidermal growth factor-like domains protein 8 | MEGF8    | 100.0 | NA    | 2  | NA | 2  | NA | 2   | NA  | 1.2  | NA   |

|                                                                                              |         |       |       |   |    |    |    |     |     |      |      |
|----------------------------------------------------------------------------------------------|---------|-------|-------|---|----|----|----|-----|-----|------|------|
| Arf-GAP with GTPase, ANK repeat and PH domain-containing protein 2                           | AGAP2   | 100.0 | 100.0 | 2 | 2  | 2  | 2  | 3   | 3   | 1.6  | 1.3  |
| Protein-methionine sulfoxide oxidase MICAL3                                                  | MICAL3  | 100.0 | NA    | 3 | NA | 3  | NA | 3   | NA  | 0.0  | NA   |
| Lipopolysaccharide-binding protein                                                           | LBP     | 100.0 | 100.0 | 8 | 8  | 14 | 13 | 58  | 54  | 19.8 | 19.8 |
| Apolipoprotein A-II                                                                          | APOA2   | 100.0 | 100.0 | 8 | 8  | 19 | 20 | 281 | 275 | 47.0 | 47.0 |
| Isoform 2 of RAC-gamma serine/threonine-protein kinase                                       | AKT3    | 100.0 | NA    | 2 | NA | 2  | NA | 3   | NA  | 0.0  | NA   |
| CDP-diacylglycerol--glycerol-3-phosphate 3-phosphatidyltransferase, mitochondrial (Fragment) | PGS1    | 100.0 | NA    | 2 | NA | 2  | NA | 2   | NA  | 4.9  | NA   |
| Cadherin 1, type 1, E-cadherin (Epithelial), isoform CRA_c                                   | CDH1    | 100.0 | NA    | 2 | NA | 2  | NA | 2   | NA  | 0.0  | NA   |
| Dynein heavy chain 8, axonemal                                                               | DNAH8   | 100.0 | 100.0 | 2 | 2  | 2  | 2  | 3   | 3   | 0.0  | 0.0  |
| Structure-specific endonuclease subunit SLX4                                                 | SLX4    | 100.0 | NA    | 2 | NA | 2  | NA | 2   | NA  | 0.0  | NA   |
| Transcriptional repressor NF-X1                                                              | NFX1    | 100.0 | 100.0 | 3 | 2  | 3  | 2  | 4   | 4   | 3.6  | 2.1  |
| Transient receptor potential cation channel subfamily M member 6                             | TRPM6   | 100.0 | NA    | 3 | NA | 3  | NA | 3   | NA  | 0.0  | NA   |
| Cohesin subunit SA-1                                                                         | STAG1   | 100.0 | NA    | 2 | NA | 2  | NA | 2   | NA  | 1.6  | NA   |
| Isoform 2 of Nebulin-related-anchoring protein                                               | NRAP    | 100.0 | 100.0 | 2 | 2  | 2  | 2  | 2   | 2   | 0.0  | 1.5  |
| Glutamate receptor 4                                                                         | GRIA4   | 100.0 | NA    | 2 | NA | 2  | NA | 2   | NA  | 0.0  | NA   |
| Pleckstrin homology domain-containing family A member 6                                      | PLEKHA6 | 100.0 | NA    | 2 | NA | 2  | NA | 7   | NA  | 0.0  | NA   |
| Apolipoprotein D                                                                             | APOD    | 100.0 | 100.0 | 6 | 6  | 13 | 13 | 47  | 46  | 31.2 | 31.2 |
| Methyltransferase-like protein 25                                                            | METTL25 | 100.0 | NA    | 2 | NA | 2  | NA | 2   | NA  | 4.3  | NA   |
| Isoform 5 of Centriolin                                                                      | CNTRL   | 100.0 | 100.0 | 2 | 2  | 2  | 2  | 2   | 2   | 0.0  | 0.0  |

|                                                                                |          |       |       |    |    |     |     |      |     |      |      |
|--------------------------------------------------------------------------------|----------|-------|-------|----|----|-----|-----|------|-----|------|------|
| Isoform 2 of A disintegrin and metalloproteinase with thrombospondin motifs 13 | ADAMTS13 | 100.0 | 100.0 | 2  | 5  | 2   | 5   | 4    | 6   | 1.7  | 5.0  |
| Plexin-A2                                                                      | PLXNA2   | 100.0 | 100.0 | 2  | 2  | 2   | 2   | 3    | 2   | 1.7  | 1.9  |
| Isoform 2 of KN motif and ankyrin repeat domain-containing protein 1           | KANK1    | 100.0 | 100.0 | 2  | 2  | 2   | 2   | 2    | 3   | 0.0  | 0.0  |
| Coagulation factor X                                                           | F10      | 100.0 | 100.0 | 12 | 13 | 16  | 18  | 27   | 35  | 27.0 | 27.0 |
| Endothelial protein C receptor                                                 | PROCR    | 100.0 | 100.0 | 2  | 2  | 2   | 2   | 2    | 2   | 7.1  | 7.1  |
| Transketolase                                                                  | TKT      | 100.0 | 100.0 | 3  | 2  | 3   | 2   | 3    | 3   | 6.9  | 5.4  |
| Isoform 3 of Eukaryotic translation initiation factor 4 gamma 3                | EIF4G3   | 100.0 | NA    | 3  | NA | 3   | NA  | 3    | NA  | 2.1  | NA   |
| Nucleoprotein TPR                                                              | TPR      | 100.0 | 100.0 | 2  | 2  | 2   | 2   | 2    | 2   | 0.0  | 0.9  |
| Neural cell adhesion molecule 1                                                | NCAM1    | 100.0 | 100.0 | 3  | 2  | 4   | 2   | 4    | 3   | 7.4  | 2.5  |
| Ficolin-2                                                                      | FCN2     | 100.0 | 100.0 | 4  | 4  | 5   | 5   | 7    | 5   | 17.6 | 17.6 |
| Gelsolin                                                                       | GSN      | 100.0 | 100.0 | 29 | 29 | 48  | 44  | 227  | 232 | 47.1 | 47.4 |
| Complement C4-B                                                                | C4B      | 100.0 | 100.0 | 69 | 70 | 141 | 146 | 1011 | 961 | 49.3 | 49.8 |
| Protein AMBP                                                                   | AMBP     | 100.0 | 100.0 | 12 | 12 | 25  | 25  | 173  | 165 | 43.5 | 43.5 |
| Transforming growth factor beta-1                                              | TGFB1    | 100.0 | NA    | 2  | NA | 2   | NA  | 2    | NA  | 0.0  | NA   |
| Putative methyltransferase NSUN6                                               | NSUN6    | 100.0 | NA    | 2  | NA | 2   | NA  | 2    | NA  | 3.0  | NA   |
| Isoform A of GDP-fucose protein O-fucosyltransferase 2                         | POFUT2   | 100.0 | NA    | 2  | NA | 2   | NA  | 2    | NA  | 5.7  | NA   |
| Nesprin-2                                                                      | SYNE2    | 100.0 | 100.0 | 3  | 4  | 3   | 4   | 3    | 5   | 0.0  | 0.0  |
| Complement C4-A                                                                | C4A      | 100.0 | 100.0 | 4  | 4  | 7   | 6   | 28   | 29  | 49.3 | 49.8 |
| Macrophage colony-stimulating factor 1 receptor                                | CSF1R    | 100.0 | 100.0 | 2  | 2  | 3   | 3   | 9    | 6   | 3.1  | 3.1  |
| Isoform 2 of Protein SOGA1                                                     | SOGA1    | 100.0 | 100.0 | 2  | 2  | 2   | 2   | 3    | 3   | 0.0  | 0.0  |
| Retinol-binding protein 4                                                      | RBP4     | 100.0 | 100.0 | 10 | 11 | 25  | 27  | 383  | 306 | 71.6 | 79.1 |
| Mitogen-activated protein kinase-binding protein 1                             | MAPKBP1  | 100.0 | 100.0 | 2  | 2  | 3   | 2   | 5    | 6   | 1.2  | 1.3  |

|                                                                     |          |       |       |    |    |    |    |     |     |      |      |
|---------------------------------------------------------------------|----------|-------|-------|----|----|----|----|-----|-----|------|------|
| Isoform 2 of Vitamin K-dependent protein Z                          | PROZ     | 100.0 | 100.0 | 6  | 6  | 6  | 6  | 11  | 11  | 13.5 | 13.5 |
| Isoform 2 of Neurochondrin                                          | NCDN     | 100.0 | NA    | 2  | NA | 2  | NA | 2   | NA  | 2.4  | NA   |
| Thyroxine-binding globulin                                          | SERPINA7 | 100.0 | 100.0 | 13 | 13 | 24 | 24 | 64  | 65  | 36.4 | 40.7 |
| Cholinesterase                                                      | BCHE     | 100.0 | 100.0 | 11 | 11 | 16 | 15 | 26  | 26  | 25.1 | 25.1 |
| Probable cation-transporting ATPase 13A5                            | ATP13A5  | 100.0 | NA    | 2  | NA | 2  | NA | 2   | NA  | 3.7  | NA   |
| Coiled-coil domain-containing protein 164                           | CCDC164  | 100.0 | NA    | 2  | NA | 2  | NA | 2   | NA  | 0.0  | NA   |
| Peptidyl-prolyl cis-trans isomerase G                               | PPIG     | 100.0 | NA    | 2  | NA | 2  | NA | 4   | NA  | 3.9  | NA   |
| Isoform 2 of CaiB/baiF CoA-transferase family protein C7orf10       | C7orf10  | 100.0 | NA    | 2  | NA | 2  | NA | 4   | NA  | 0.0  | NA   |
| Protocadherin-16                                                    | DCHS1    | 100.0 | NA    | 2  | NA | 2  | NA | 2   | NA  | 0.9  | NA   |
| Protein Shroom2                                                     | SHROOM2  | 100.0 | 100.0 | 2  | 2  | 2  | 2  | 2   | 2   | 1.4  | 1.4  |
| Sulfide:quinone oxidoreductase, mitochondrial                       | SQRDL    | 100.0 | NA    | 2  | NA | 2  | NA | 2   | NA  | 5.1  | NA   |
| Pyruvate carboxylase, mitochondrial                                 | PC       | 100.0 | NA    | 2  | NA | 2  | NA | 2   | NA  | 0.0  | NA   |
| Complement component C8 beta chain                                  | C8B      | 100.0 | 100.0 | 23 | 22 | 35 | 34 | 143 | 124 | 46.4 | 44.8 |
| Laminin subunit alpha-5                                             | LAMA5    | 100.0 | NA    | 3  | NA | 3  | NA | 3   | NA  | 0.0  | NA   |
| Isoform 4 of Phosphatidylinositol 3-kinase regulatory subunit alpha | PIK3R1   | 99.9  | NA    | 2  | NA | 2  | NA | 3   | NA  | 0.0  | NA   |
| Apolipoprotein C-I                                                  | APOC1    | 100.0 | 100.0 | 5  | 5  | 6  | 6  | 17  | 16  | 37.3 | 37.3 |
| Isoform 3 of Rho GTPase-activating protein 30                       | ARHGAP30 | 100.0 | NA    | 2  | NA | 2  | NA | 2   | NA  | 3.0  | NA   |
| G-protein coupled receptor-associated sorting protein 1             | GPRASP1  | 100.0 | 100.0 | 3  | 2  | 3  | 2  | 4   | 2   | 3.0  | 2.6  |

|                                                                               |          |       |       |    |    |    |    |     |     |      |      |
|-------------------------------------------------------------------------------|----------|-------|-------|----|----|----|----|-----|-----|------|------|
| Dynein heavy chain 12, axonemal                                               | DNAH12   | 100.0 | NA    | 3  | NA | 3  | NA | 3   | NA  | 1.6  | NA   |
| Apolipoprotein E                                                              | APOE     | 100.0 | 100.0 | 20 | 21 | 37 | 35 | 134 | 130 | 58.4 | 61.8 |
| Isoform 2 of Ectonucleotide pyrophosphatase/phosphodiesterase family member 2 | ENPP2    | 100.0 | 100.0 | 3  | 3  | 4  | 3  | 6   | 3   | 3.5  | 3.6  |
| Clustered mitochondria protein homolog                                        | CLUH     | 100.0 | NA    | 2  | NA | 2  | NA | 3   | NA  | 2.1  | NA   |
| Isoform 2 of DDB1- and CUL4-associated factor 6                               | DCAF6    | 100.0 | NA    | 2  | NA | 2  | NA | 2   | NA  | 2.2  | NA   |
| Vitamin D-binding protein                                                     | GC       | 100.0 | 100.0 | 32 | 32 | 74 | 72 | 505 | 561 | 72.0 | 72.0 |
| RAS protein activator like-3                                                  | RASAL3   | 100.0 | NA    | 2  | NA | 2  | NA | 2   | NA  | 0.0  | NA   |
| Terminal uridylyltransferase 7                                                | ZCCHC6   | 100.0 | 100.0 | 2  | 2  | 2  | 2  | 2   | 3   | 1.1  | 1.1  |
| Uncharacterized protein C12orf55                                              | C12orf55 | 100.0 | NA    | 4  | NA | 4  | NA | 4   | NA  | 1.8  | NA   |
| Isoform 2 of Peripheral-type benzodiazepine receptor-associated protein 1     | BZRAP1   | 100.0 | NA    | 2  | NA | 2  | NA | 2   | NA  | 2.1  | NA   |
| Zinc-alpha-2-glycoprotein                                                     | AZGP1    | 100.0 | 100.0 | 15 | 15 | 34 | 34 | 151 | 135 | 53.0 | 53.0 |
| Protein FAM3B                                                                 | FAM3B    | 100.0 | NA    | 2  | NA | 2  | NA | 2   | NA  | 14.0 | NA   |
| Dopamine beta-hydroxylase                                                     | DBH      | 100.0 | 100.0 | 3  | 4  | 5  | 5  | 9   | 8   | 6.8  | 10.2 |
| Di-N-acetylchitinase                                                          | CTBS     | 100.0 | 100.0 | 3  | 2  | 3  | 2  | 3   | 3   | 6.2  | 5.5  |
| Tyrosine-protein kinase Fgr                                                   | FGR      | 100.0 | NA    | 2  | NA | 2  | NA | 2   | NA  | 4.5  | NA   |
| Nestin                                                                        | NES      | 100.0 | 100.0 | 3  | 3  | 3  | 3  | 7   | 6   | 1.6  | 1.7  |
| Isoform 2 of Serine/arginine repetitive matrix protein 1                      | SRRM1    | 100.0 | NA    | 2  | NA | 2  | NA | 3   | NA  | 2.8  | NA   |
| Low affinity immunoglobulin gamma Fc region receptor III-B                    | FCGR3B   | 100.0 | 100.0 | 3  | 3  | 3  | 3  | 3   | 4   | 11.6 | 11.6 |
| ZAR1-like protein                                                             | ZAR1L    | 100.0 | NA    | 2  |    | 2  |    | 2   | NA  | 8.4  | NA   |

|                                                                |            |       |       |    |    |    |    |    |    |      |      |
|----------------------------------------------------------------|------------|-------|-------|----|----|----|----|----|----|------|------|
|                                                                |            |       |       |    | NA |    | NA |    |    |      |      |
| Keratin, type II cuticular Hb2                                 | KRT82      | 100.0 | 100.0 | 2  | 4  | 2  | 5  | 3  | 5  | 5.9  | 14.4 |
| Isoform 10 of Collectin-11                                     | COLEC11    | 100.0 | NA    | 2  | NA | 2  | NA | 3  | NA | 8.8  | NA   |
| Procollagen C-endopeptidase enhancer 1                         | PCOLCE     | 100.0 | 100.0 | 4  | 4  | 4  | 4  | 6  | 6  | 12.5 | 11.1 |
| Isoform 2 of Thioredoxin                                       | TXN        | 100.0 | 100.0 | 2  | 2  | 2  | 2  | 2  | 2  | 12.9 | 21.2 |
| Actin, cytoplasmic 1                                           | ACTB       | 100.0 | 100.0 | 12 | 11 | 18 | 20 | 36 | 40 | 48.5 | 42.4 |
| Uveal autoantigen with coiled-coil domains and ankyrin repeats | UACA       | 100.0 | 100.0 | 3  | 2  | 4  | 2  | 13 | 3  | 0.0  | 1.6  |
| Alpha-N-acetylgalactosaminide alpha-2,6-sialyltransferase 1    | ST6GALNAC1 | 100.0 | NA    | 2  | NA | 3  | NA | 3  | NA | 0.0  | NA   |
| Envoplakin                                                     | EVPL       | 100.0 | 100.0 | 2  | 2  | 2  | 2  | 2  | 2  | 0.9  | 1.3  |
| Apolipoprotein M                                               | APOM       | 100.0 | 100.0 | 6  | 6  | 9  | 11 | 31 | 36 | 36.7 | 36.7 |
| Spectrin beta chain, non-erythrocytic 1                        | SPTBN1     | 100.0 | 100.0 | 2  | 2  | 2  | 2  | 2  | 2  | 1.1  | 1.7  |
| Cytoplasmic dynein 2 heavy chain 1                             | DYNC2H1    | 100.0 | 100.0 | 4  | 2  | 4  | 2  | 4  | 3  | 1.4  | 0.7  |
| Mothers against decapentaplegic homolog 7                      | SMAD7      | 100.0 | NA    | 2  | NA | 2  | NA | 2  | NA | 4.5  | NA   |
| Putative Polycomb group protein ASXL3                          | ASXL3      | 100.0 | 100.0 | 2  | 2  | 2  | 2  | 4  | 4  | 0.0  | 0.0  |
| Isoform 2 of A-kinase anchor protein 9                         | AKAP9      | 100.0 | 100.0 | 2  | 4  | 2  | 4  | 2  | 4  | 0.0  | 0.0  |
| Testis-specific gene 10 protein (Fragment)                     | TSGA10     | 100.0 | NA    | 2  | NA | 2  | NA | 2  | NA | 0.0  | NA   |
| Vacuolar protein sorting-associated protein 16 homolog         | VPS16      | 100.0 | 100.0 | 2  | 2  | 2  | 2  | 2  | 3  | 0.0  | 0.0  |
| Peroxiredoxin-2                                                | PRDX2      | 100.0 | 100.0 | 9  | 8  | 10 | 8  | 23 | 22 | 37.4 | 32.8 |
| Isoform 3 of Oxysterol-binding protein-related protein 6       | OSBPL6     | 100.0 | NA    | 4  | NA | 4  | NA | 9  | NA | 0.0  | NA   |
| Protein FAM76A                                                 | FAM76A     | 100.0 | NA    | 2  | NA | 2  | NA | 2  | NA | 0.0  | NA   |
| Junction plakoglobin                                           | JUP        | 100.0 | 100.0 | 6  | 4  | 7  | 4  | 8  | 4  | 20.0 | 13.0 |

|                                                            |          |       |       |    |    |    |    |     |     |      |      |
|------------------------------------------------------------|----------|-------|-------|----|----|----|----|-----|-----|------|------|
| Isoform 2 of N-acetylmuramoyl-L-alanine amidase            | PGLYRP2  | 100.0 | 100.0 | 12 | 13 | 29 | 28 | 92  | 81  | 28.1 | 30.9 |
| Complement component C6                                    | C6       | 100.0 | 100.0 | 35 | 39 | 52 | 54 | 190 | 193 | 37.0 | 42.4 |
| SCO-spondin                                                | SSPO     | 100.0 | 100.0 | 2  | 2  | 2  | 3  | 4   | 4   | 0.5  | 0.5  |
| Isoform 3 of Agrin                                         | AGRN     | 100.0 | 100.0 | 2  | 2  | 2  | 2  | 2   | 2   | 0.0  | 0.0  |
| Splicing factor 3A subunit 1                               | SF3A1    | 100.0 | 100.0 | 3  | 4  | 3  | 4  | 5   | 7   | 4.0  | 5.1  |
| Ficolin-3                                                  | FCN3     | 100.0 | 100.0 | 9  | 9  | 15 | 14 | 68  | 60  | 34.8 | 34.8 |
| Paternally-expressed gene 3 protein                        | PEG3     | 100.0 | 100.0 | 2  | 2  | 3  | 3  | 7   | 10  | 0.0  | 0.0  |
| Huntingtin-associated protein 1                            | HAP1     | 100.0 | 100.0 | 2  | 3  | 2  | 3  | 5   | 13  | 4.5  | 8.2  |
| Isoform 6 of Titin                                         | TTN      | 100.0 | 100.0 | 2  | 2  | 2  | 2  | 2   | 11  | 0.6  | 0.0  |
| Glutathione synthetase                                     | GSS      | 100.0 | 100.0 | 2  | 3  | 2  | 3  | 2   | 3   | 11.3 | 9.5  |
| Rho GTPase-activating protein 21                           | ARHGAP21 | 100.0 | 100.0 | 4  | 3  | 4  | 3  | 5   | 5   | 3.8  | 2.8  |
| Probable exonuclease mut-7 homolog                         | EXD3     | 100.0 | 100.0 | 2  | 2  | 2  | 2  | 2   | 2   | 0.0  | 0.0  |
| Zinc finger protein 697                                    | ZNF697   | 100.0 | 100.0 | 2  | 2  | 2  | 2  | 9   | 5   | 0.0  | 0.0  |
| Oligoribonuclease, mitochondrial                           | REXO2    | 100.0 | NA    | 2  | NA | 2  | NA | 2   | NA  | 10.4 | NA   |
| Plasma protease C1 inhibitor                               | SERPING1 | 100.0 | 100.0 | 14 | 15 | 33 | 33 | 294 | 263 | 23.4 | 25.4 |
| Collagen alpha-3(VI) chain                                 | COL6A3   | 100.0 | 100.0 | 3  | 6  | 4  | 6  | 6   | 7   | 1.7  | 3.5  |
| Cystatin-C                                                 | CST3     | 100.0 | 100.0 | 3  | 3  | 5  | 5  | 8   | 7   | 19.2 | 19.2 |
| DNA polymerase                                             | POLA1    | 100.0 | NA    | 2  | NA | 2  | NA | 4   | NA  | 2.2  | NA   |
| Isoform 2 of Myosin-14                                     | MYH14    | 100.0 | 100.0 | 4  | 3  | 4  | 3  | 5   | 3   | 0.0  | 0.0  |
| Calcium-binding mitochondrial carrier protein Aralar1      | SLC25A12 | 100.0 | NA    | 2  | NA | 2  | NA | 3   | NA  | 4.6  | NA   |
| Uncharacterized protein KIAA0947                           | KIAA0947 | 100.0 | NA    | 2  | NA | 2  | NA | 3   | NA  | 0.0  | NA   |
| Microtubule-actin cross-linking factor 1, isoforms 1/2/3/5 | MACF1    | 100.0 | 100.0 | 3  | 5  | 3  | 5  | 5   | 6   | 0.0  | 0.8  |
| 78 kDa glucose-regulated protein                           | HSPA5    | 100.0 | 100.0 | 4  | 4  | 4  | 4  | 6   | 6   | 8.9  | 8.9  |
| Glyceraldehyde-3-phosphate dehydrogenase                   | GAPDH    | 100.0 | 100.0 | 4  | 5  | 4  | 5  | 10  | 7   | 17.6 | 24.6 |

|                                                                                   |          |       |       |    |    |    |    |     |     |      |      |
|-----------------------------------------------------------------------------------|----------|-------|-------|----|----|----|----|-----|-----|------|------|
| Isoform 2 of Cell surface glycoprotein MUC18                                      | MCAM     | 100.0 | 100.0 | 4  | 6  | 5  | 8  | 7   | 10  | 8.2  | 13.2 |
| Inhibin beta E chain                                                              | INHBE    | 100.0 | NA    | 2  | NA | 2  | NA | 2   | NA  | 8.0  | NA   |
| Mucin-19                                                                          | MUC19    | 100.0 | 100.0 | 2  | 4  | 2  | 4  | 2   | 4   | 0.0  | 0.0  |
| Isoform 2 of Autophagy-related protein 13                                         | ATG13    | 100.0 | NA    | 2  | NA | 2  | NA | 2   | NA  | 7.5  | NA   |
| Oncostatin-M-specific receptor subunit beta                                       | OSMR     | 100.0 | NA    | 2  | NA | 2  | NA | 2   | NA  | 2.6  | NA   |
| Selenoprotein P                                                                   | SEPP1    | 100.0 | 100.0 | 5  | 6  | 9  | 9  | 18  | 22  | 12.3 | 14.4 |
| Alpha-1B-glycoprotein                                                             | A1BG     | 100.0 | 100.0 | 15 | 16 | 30 | 34 | 269 | 229 | 53.9 | 58.0 |
| Arf-GAP with coiled-coil, ANK repeat and PH domain-containing protein 2           | ACAP2    | 100.0 | 100.0 | 2  | 2  | 2  | 2  | 3   | 2   | 0.0  | 0.0  |
| DmX-like protein 1                                                                | DMXL1    | 100.0 | 100.0 | 2  | 2  | 2  | 2  | 2   | 2   | 0.0  | 0.0  |
| Apolipoprotein C-II                                                               | APOC2    | 100.0 | 100.0 | 7  | 7  | 11 | 12 | 32  | 39  | 36.0 | 36.0 |
| Isoform 3 of Transcription initiation factor TFIID subunit 1                      | TAF1     | 100.0 | NA    | 2  | NA | 2  | NA | 2   | NA  | 1.1  | NA   |
| Isoform 2 of [Pyruvate dehydrogenase [lipoamide]] kinase isozyme 3, mitochondrial | PDK3     | 100.0 | NA    | 2  | NA | 2  | NA | 2   | NA  | 0.0  | NA   |
| Isoform 2 of Phosphatidylinositol 3,4,5-trisphosphate 5-phosphatase 2             | INPPL1   | 100.0 | NA    | 2  | NA | 2  | NA | 2   | NA  | 0.0  | NA   |
| Lumican                                                                           | LUM      | 100.0 | 100.0 | 11 | 11 | 23 | 21 | 94  | 96  | 37.6 | 37.6 |
| Nuclear receptor ROR-alpha                                                        | RORA     | 100.0 | NA    | 2  | NA | 2  | NA | 2   | NA  | 0.0  | NA   |
| Neutrophil gelatinase-associated lipocalin                                        | LCN2     | 100.0 | NA    | 2  | NA | 2  | NA | 2   | NA  | 16.0 | NA   |
| Isoform 4 of Uncharacterized protein KIAA1683                                     | KIAA1683 | 100.0 | 100.0 | 2  | 3  | 2  | 3  | 3   | 3   | 1.8  | 0.0  |
| Coiled-coil domain-containing protein 73                                          | CCDC73   | 100.0 | NA    | 2  | NA | 2  | NA | 2   | NA  | 0.0  | NA   |



|                                                                          |         |       |       |    |    |    |    |     |     |      |      |
|--------------------------------------------------------------------------|---------|-------|-------|----|----|----|----|-----|-----|------|------|
| Isoform 4 of Cell division cycle protein 20 homolog B                    | CDC20B  | 100.0 | NA    | 2  | NA | 2  | NA | 5   | NA  | 0.0  | NA   |
| Chromodomain-helicase-DNA-binding protein 7                              | CHD7    | 100.0 | NA    | 3  | NA | 3  | NA | 4   | NA  | 0.9  | NA   |
| Low-density lipoprotein receptor-related protein 4                       | LRP4    | 100.0 | NA    | 3  | NA | 3  | NA | 3   | NA  | 0.0  | NA   |
| Band 4.1-like protein 3                                                  | EPB41L3 | 100.0 | NA    | 2  | NA | 2  | NA | 2   | NA  | 0.0  | NA   |
| Isoform 6 of Voltage-dependent P/Q-type calcium channel subunit alpha-1A | CACNA1A | 100.0 | 100.0 | 2  | 4  | 2  | 4  | 2   | 4   | 0.0  | 0.0  |
| Cyclin-dependent kinase 13                                               | CDK13   | 100.0 | NA    | 2  | NA | 2  | NA | 3   | NA  | 1.4  | NA   |
| Isoform 2 of Hyaluronan-binding protein 2                                | HABP2   | 100.0 | 100.0 | 13 | 15 | 15 | 16 | 32  | 34  | 23.2 | 28.3 |
| Sex hormone-binding globulin                                             | SHBG    | 100.0 | 100.0 | 7  | 7  | 11 | 10 | 21  | 27  | 22.1 | 23.5 |
| Luc7-like protein 3                                                      | LUC7L3  | 100.0 | 100.0 | 2  | 2  | 2  | 2  | 3   | 3   | 5.3  | 4.7  |
| Isoform 2 of Neurobeachin-like protein 2                                 | NBEAL2  | 100.0 | NA    | 2  | NA | 2  | NA | 2   | NA  | 0.7  | NA   |
| Plasmalemma vesicle-associated protein                                   | PLVAP   | 100.0 | 100.0 | 2  | 3  | 2  | 3  | 2   | 4   | 0.0  | 0.0  |
| Potassium voltage-gated channel subfamily B member 1                     | KCNB1   | 100.0 | NA    | 2  | NA | 2  | NA | 2   | NA  | 0.0  | NA   |
| Inter-alpha-trypsin inhibitor heavy chain H4                             | ITIH4   | 100.0 | 100.0 | 32 | 31 | 60 | 56 | 345 | 345 | 41.6 | 40.9 |
| Epidermal growth factor receptor                                         | EGFR    | 100.0 | 100.0 | 2  | 2  | 2  | 2  | 2   | 2   | 1.8  | 1.8  |
| Baculoviral IAP repeat-containing protein 1 (Fragment)                   | psiNAIP | 100.0 | 100.0 | 2  | 2  | 2  | 2  | 5   | 4   | 0.0  | 0.0  |
| Prolactin-inducible protein                                              | PIP     | 100.0 | NA    | 2  | NA | 2  | NA | 3   | NA  | 15.8 | NA   |
| Keratin, type I cytoskeletal 9                                           | KRT9    | 100.0 | 100.0 | 24 | 24 | 45 | 42 | 140 | 152 | 57.8 | 57.6 |
| Obscurin                                                                 | OBSCN   | 100.0 | 100.0 | 4  | 4  | 4  | 4  | 7   | 5   | 0.5  | 0.6  |

|                                                                            |          |       |       |   |    |   |    |    |    |      |      |
|----------------------------------------------------------------------------|----------|-------|-------|---|----|---|----|----|----|------|------|
| Gamma-glutamyl hydrolase                                                   | GGH      | 100.0 | 100.0 | 2 | 4  | 2 | 4  | 2  | 5  | 7.2  | 14.2 |
| Uncharacterized protein C1orf173                                           | C1orf173 | 100.0 | NA    | 3 | NA | 3 | NA | 3  | NA | 3.2  | NA   |
| Isoform SERCA1A of Sarcoplasmic/endoplasmic reticulum calcium ATPase 1     | ATP2A1   | 100.0 | NA    | 2 | NA | 2 | NA | 2  | NA | 0.0  | NA   |
| Ig kappa chain C region                                                    | IGKC     | 100.0 | 100.0 | 5 | 4  | 5 | 4  | 6  | 6  | 80.2 | 67.0 |
| Isoform 2 of Helicase SRCAP                                                | SRCAP    | 100.0 | 100.0 | 3 | 3  | 3 | 3  | 3  | 3  | 0.0  | 0.0  |
| Ig lambda-2 chain C regions                                                | IGLC2    | 100.0 | 100.0 | 5 | 4  | 7 | 6  | 15 | 12 | 63.2 | 55.7 |
| Isoform 2 of Cytochrome P450 1A2                                           | CYP1A2   | 99.9  | 99.9  | 2 | 2  | 2 | 2  | 4  | 4  | 3.5  | 3.5  |
| PERQ amino acid-rich with GYF domain-containing protein 1                  | GIGYF1   | 100.0 | NA    | 2 | NA | 2 | NA | 2  | NA | 3.1  | NA   |
| Retinoblastoma-like protein 2                                              | RBL2     | 100.0 | NA    | 2 | NA | 2 | NA | 3  | NA | 0.0  | NA   |
| Complement C1q subcomponent subunit A                                      | C1QA     | 100.0 | 100.0 | 3 | 5  | 5 | 7  | 19 | 18 | 17.6 | 18.4 |
| Vacuolar protein sorting-associated protein 13D                            | VPS13D   | 100.0 | 100.0 | 6 | 4  | 6 | 4  | 6  | 5  | 1.6  | 1.2  |
| Golgi-specific brefeldin A-resistance guanine nucleotide exchange factor 1 | GBF1     | 100.0 | NA    | 2 | NA | 2 | NA | 2  | NA | 1.1  | NA   |
| Myomesin-1                                                                 | MYOM1    | 100.0 | 100.0 | 3 | 2  | 3 | 2  | 3  | 2  | 1.9  | 1.2  |
| Isoform 2 of Neural cell adhesion molecule L1-like protein                 | CHL1     | 100.0 | 100.0 | 4 | 5  | 4 | 5  | 5  | 6  | 3.3  | 4.7  |
| Isoform B of Interferon regulatory factor 7                                | IRF7     | 99.9  | NA    | 2 | NA | 2 | NA | 2  | NA | 7.4  | NA   |
| Isoform B of Coagulation factor VII                                        | F7       | 100.0 | NA    | 2 | NA | 2 | NA | 2  | NA | 9.5  | NA   |
| Protein IWS1 homolog                                                       | IWS1     | 100.0 | NA    | 2 | NA | 2 | NA | 2  | NA | 0.0  | NA   |
| Pentatricopeptide repeat-containing protein 2, mitochondrial               | PTCD2    | 100.0 | NA    | 3 | NA | 3 | NA | 3  | NA | 0.0  | NA   |

|                                                                                   |          |       |       |   |    |    |    |    |    |      |      |
|-----------------------------------------------------------------------------------|----------|-------|-------|---|----|----|----|----|----|------|------|
| Serine/threonine-protein phosphatase 2A 55 kDa regulatory subunit B delta isoform | PPP2R2D  | 100.0 | NA    | 2 | NA | 2  | NA | 6  | NA | 4.2  | NA   |
| Ras GTPase-activating protein 3                                                   | RASA3    | 100.0 | NA    | 2 | NA | 2  | NA | 2  | NA | 3.4  | NA   |
| Protein S100-A8                                                                   | S100A8   | 100.0 | 100.0 | 4 | 3  | 5  | 4  | 12 | 10 | 33.3 | 32.3 |
| Sodium channel and clathrin linker 1                                              | SCLT1    | 100.0 | NA    | 2 | NA | 2  | NA | 2  | NA | 3.2  | NA   |
| Isoform 2 of Dynein heavy chain 9, axonemal                                       | DNAH9    | 100.0 | 100.0 | 2 | 3  | 2  | 3  | 2  | 7  | 0.6  | 0.0  |
| Protein Shroom3                                                                   | SHROOM3  | 100.0 | NA    | 3 | NA | 3  | NA | 4  | NA | 0.0  | NA   |
| Laminin subunit gamma-1                                                           | LAMC1    | 100.0 | 100.0 | 2 | 3  | 2  | 3  | 2  | 3  | 0.0  | 0.0  |
| Ninein-like protein                                                               | NINL     | 100.0 | 100.0 | 2 | 2  | 2  | 2  | 3  | 2  | 1.6  | 1.6  |
| Isoform 2 of Zinc finger protein 839                                              | ZNF839   | 100.0 | NA    | 2 | NA | 2  | NA | 2  | NA | 4.1  | NA   |
| Keratin, type II cytoskeletal 74                                                  | KRT74    | 100.0 | NA    | 3 | NA | 3  | NA | 4  | NA | 9.6  | NA   |
| SAFB-like transcription modulator                                                 | SLTM     | 100.0 | 100.0 | 2 | 2  | 2  | 2  | 2  | 2  | 1.7  | 1.7  |
| Intercellular adhesion molecule 1                                                 | ICAM1    | 100.0 | 100.0 | 3 | 3  | 3  | 4  | 5  | 6  | 7.9  | 7.7  |
| Cartilage oligomeric matrix protein                                               | COMP     | 100.0 | 100.0 | 6 | 6  | 7  | 6  | 7  | 6  | 11.5 | 11.5 |
| WASH complex subunit strumpellin                                                  | KIAA0196 | 100.0 | 100.0 | 2 | 2  | 2  | 2  | 2  | 2  | 2.9  | 0.0  |
| Serum amyloid P-component                                                         | APCS     | 100.0 | 100.0 | 7 | 7  | 13 | 12 | 66 | 68 | 30.0 | 30.0 |
| Isoform Short of Adenomatous polyposis coli protein                               | APC      | 100.0 | 100.0 | 5 | 4  | 5  | 4  | 9  | 11 | 2.8  | 2.2  |
| Versican core protein                                                             | VCAN     | 100.0 | NA    | 2 | NA | 2  | NA | 4  | NA | 0.7  | NA   |
| Coagulation factor XIII A chain                                                   | F13A1    | 100.0 | 100.0 | 7 | 7  | 10 | 10 | 21 | 22 | 11.3 | 11.9 |
| Breast cancer type 2 susceptibility protein                                       | BRCA2    | 100.0 | NA    | 2 | NA | 2  | NA | 2  | NA | 0.0  | NA   |
| Centrosomal protein of 192 kDa                                                    | CEP192   | 100.0 | 100.0 | 2 | 2  | 2  | 2  | 2  | 2  | 1.1  | 0.0  |
| Carboxypeptidase B2                                                               | CPB2     | 100.0 | 100.0 | 9 | 9  | 12 | 13 | 31 | 27 | 25.3 | 28.1 |

|                                                                   |         |       |       |    |    |    |    |     |     |      |      |
|-------------------------------------------------------------------|---------|-------|-------|----|----|----|----|-----|-----|------|------|
| Isoform 2 of Zinc finger protein 292                              | ZNF292  | 100.0 | 100.0 | 2  | 2  | 2  | 2  | 2   | 2   | 0.0  | 0.0  |
| Isoform 2 of ATP-binding cassette sub-family C member 8           | ABCC8   | 100.0 | NA    | 2  | NA | 2  | NA | 2   | NA  | 0.0  | NA   |
| Isoform 2 of Scavenger receptor cysteine-rich type 1 protein M130 | CD163   | 100.0 | 100.0 | 2  | 2  | 2  | 2  | 2   | 2   | 1.6  | 1.7  |
| Coagulation factor IX                                             | F9      | 100.0 | 100.0 | 10 | 10 | 12 | 11 | 19  | 21  | 28.2 | 29.7 |
| Activity-dependent neuroprotector homeobox protein                | ADNP    | 100.0 | NA    | 2  | NA | 2  | NA | 2   | NA  | 0.0  | NA   |
| Peptidase inhibitor 16                                            | PI16    | 100.0 | 100.0 | 4  | 6  | 4  | 7  | 8   | 9   | 9.3  | 18.4 |
| Transient receptor potential cation channel subfamily M member 5  | TRPM5   | 100.0 | NA    | 3  | NA | 3  | NA | 3   | NA  | 3.0  | NA   |
| Mitogen-activated protein kinase kinase kinase MLK4               | MLK4    | 100.0 | NA    | 2  | NA | 2  | NA | 2   | NA  | 0.0  | NA   |
| Isoform 3 of Attractin                                            | ATRN    | 100.0 | 100.0 | 15 | 16 | 20 | 21 | 43  | 39  | 14.9 | 14.9 |
| Neuropilin-1                                                      | NRP1    | 100.0 | 100.0 | 3  | 2  | 3  | 2  | 5   | 3   | 4.5  | 3.5  |
| Microfibrillar-associated protein 1                               | MFAP1   | 100.0 | NA    | 3  | NA | 3  | NA | 3   | NA  | 0.0  | NA   |
| Hemopexin                                                         | HPX     | 100.0 | 100.0 | 24 | 23 | 50 | 51 | 604 | 587 | 58.4 | 54.8 |
| A disintegrin and metalloproteinase with thrombospondin motifs 9  | ADAMTS9 | 100.0 | 100.0 | 2  | 2  | 2  | 2  | 5   | 6   | 0.0  | 0.0  |
| Insulin-like growth factor-binding protein 3                      | IGFBP3  | 100.0 | 100.0 | 7  | 9  | 10 | 12 | 26  | 24  | 29.9 | 41.2 |
| DnaJ homolog subfamily C member 2                                 | DNAJC2  | 100.0 | NA    | 2  | NA | 2  | NA | 2   | NA  | 4.4  | NA   |
| Protein PRR14L                                                    | PRR14L  | 100.0 | NA    | 2  | NA | 2  | NA | 2   | NA  | 0.0  | NA   |
| A-kinase anchor protein 4                                         | AKAP4   | 100.0 | 100.0 | 2  | 2  | 2  | 2  | 18  | 13  | 0.0  | 0.0  |
| Zinc finger ZZ-type and EF-hand domain-containing protein 1       | ZZEF1   | 100.0 | NA    | 3  | NA | 3  | NA | 3   | NA  | 0.0  | NA   |
| Properdin                                                         | CFP     | 100.0 | 100.0 | 5  | 6  | 7  | 7  | 14  | 12  | 12.4 | 16.0 |
| Kaliocin-1 (Fragment)                                             | LTF     | 100.0 | 100.0 | 10 | 13 | 12 | 15 | 14  | 22  | 18.0 | 21.1 |

|                                                   |          |       |       |    |    |    |    |     |     |      |      |
|---------------------------------------------------|----------|-------|-------|----|----|----|----|-----|-----|------|------|
| Cofilin-1                                         | CFL1     | 100.0 | 100.0 | 2  | 2  | 3  | 2  | 3   | 3   | 15.1 | 15.1 |
| Catalase                                          | CAT      | 100.0 | 100.0 | 2  | 3  | 2  | 3  | 2   | 3   | 6.3  | 6.8  |
| Serine-protein kinase ATM                         | ATM      | 100.0 | 100.0 | 3  | 2  | 3  | 2  | 4   | 2   | 1.7  | 1.1  |
| Isoform 2 of Cyclic GMP-AMP synthase              | MB21D1   | 100.0 | 100.0 | 2  | 2  | 2  | 2  | 3   | 3   | 0.0  | 0.0  |
| CREB/ATF bZIP transcription factor                | CREBZF   | 99.9  | NA    | 2  | NA | 2  | NA | 2   | NA  | 7.8  | NA   |
| Unhealthy ribosome biogenesis protein 2 homolog   | URB2     | 100.0 | 100.0 | 2  | 2  | 2  | 2  | 3   | 2   | 0.0  | 0.0  |
| Isoform 4 of Nesprin-1                            | SYNE1    | 100.0 | 100.0 | 2  | 2  | 2  | 2  | 5   | 6   | 0.0  | 0.0  |
| Phospholipid transfer protein                     | PLTP     | 100.0 | 100.0 | 5  | 5  | 9  | 10 | 24  | 24  | 12.1 | 12.1 |
| Alpha-1-acid glycoprotein 1                       | ORM1     | 100.0 | 100.0 | 12 | 13 | 24 | 24 | 281 | 268 | 46.8 | 54.7 |
| Cysteine-rich secretory protein 3                 | CRISP3   | 100.0 | 100.0 | 2  | 3  | 3  | 3  | 4   | 5   | 6.2  | 9.1  |
| Rho GTPase-activating protein 23                  | ARHGAP23 | 100.0 | 100.0 | 6  | 5  | 6  | 5  | 6   | 5   | 0.0  | 0.0  |
| Sphingosine-1-phosphate lyase 1                   | SGPL1    | 100.0 | 100.0 | 2  | 2  | 2  | 2  | 2   | 2   | 3.2  | 3.2  |
| Centrosome-associated protein CEP250              | CEP250   | 100.0 | 100.0 | 2  | 2  | 2  | 2  | 4   | 2   | 0.0  | 0.0  |
| Isoform 20 of Fibroblast growth factor receptor 1 | FGFR1    | 100.0 | 100.0 | 2  | 3  | 2  | 3  | 2   | 3   | 3.9  | 4.7  |
| X-ray radiation resistance-associated protein 1   | XRRA1    | 100.0 | NA    | 2  | NA | 2  | NA | 6   | NA  | 3.5  | NA   |
| Isoform 2 of Intersectin-2                        | ITSN2    | 100.0 | 100.0 | 3  | 2  | 3  | 2  | 4   | 2   | 0.0  | 0.0  |
| Islet cell autoantigen 1-like protein             | ICA1L    | 100.0 | 100.0 | 2  | 2  | 2  | 3  | 6   | 8   | 0.0  | 0.0  |
| Isoform 3 of Protein FAM184A                      | FAM184A  | 100.0 | 100.0 | 2  | 2  | 2  | 3  | 2   | 3   | 0.0  | 2.1  |
| Preylcysteine oxidase 1                           | PCYOX1   | 100.0 | 100.0 | 9  | 8  | 16 | 13 | 25  | 26  | 22.8 | 19.6 |
| Vasorin                                           | VASN     | 100.0 | 100.0 | 4  | 3  | 5  | 5  | 8   | 6   | 8.0  | 6.4  |
| Keratin, type II cytoskeletal 2 epidermal         | KRT2     | 100.0 | 100.0 | 2  | 25 | 2  | 39 | 2   | 96  | 0.0  | 0.0  |
| Zinc finger RNA-binding protein                   | ZFR      | 100.0 | 100.0 | 2  | 2  | 2  | 2  | 2   | 2   | 0.0  | 0.0  |
| FYVE, RhoGEF and PH domain-containing protein 5   | FGD5     | 100.0 | 100.0 | 2  | 2  | 3  | 2  | 7   | 5   | 2.1  | 2.6  |

|                                                                   |          |       |       |    |    |    |    |     |     |      |      |
|-------------------------------------------------------------------|----------|-------|-------|----|----|----|----|-----|-----|------|------|
| Filamin-A                                                         | FLNA     | 100.0 | 100.0 | 2  | 2  | 3  | 3  | 5   | 4   | 0.7  | 0.7  |
| Complement factor H-related protein 2                             | CFHR2    | 100.0 | 100.0 | 3  | 2  | 3  | 3  | 6   | 8   | 24.1 | 20.4 |
| Isoform 2 of Nuclear receptor coactivator 7                       | NCOA7    | 100.0 | NA    | 2  | NA | 2  | NA | 2   | NA  | 0.0  | NA   |
| Transforming growth factor-beta-induced protein ig-h3             | TGFBI    | 100.0 | 100.0 | 10 | 9  | 11 | 12 | 15  | 19  | 20.6 | 19.3 |
| Inter-alpha-trypsin inhibitor heavy chain H2                      | ITIH2    | 100.0 | 100.0 | 28 | 27 | 56 | 57 | 496 | 516 | 35.4 | 35.3 |
| Protein polybromo-1                                               | PBRM1    | 100.0 | NA    | 2  | NA | 2  | NA | 2   | NA  | 1.1  | NA   |
| Dynein heavy chain 3, axonemal                                    | DNAH3    | 100.0 | NA    | 2  | NA | 2  | NA | 2   | NA  | 0.0  | NA   |
| Isoform 2 of Integrin alpha-7                                     | ITGA7    | 100.0 | 100.0 | 2  | 2  | 2  | 2  | 3   | 3   | 0.0  | 0.0  |
| Zinc finger Ran-binding domain-containing protein 2               | ZRANB2   | 100.0 | 100.0 | 3  | 2  | 3  | 2  | 3   | 3   | 11.5 | 7.3  |
| Inner nuclear membrane protein Man1                               | LEMD3    | 100.0 | 100.0 | 2  | 2  | 2  | 2  | 2   | 2   | 0.0  | 0.0  |
| Transcription termination factor 2                                | TTF2     | 100.0 | NA    | 2  | NA | 2  | NA | 8   | NA  | 2.5  | NA   |
| Fibrous sheath-interacting protein 2                              | FSIP2    | 100.0 | 100.0 | 3  | 2  | 3  | 2  | 3   | 2   | 0.0  | 0.4  |
| Basic helix-loop-helix domain-containing protein KIAA2018         | KIAA2018 | 100.0 | NA    | 2  | NA | 2  | NA | 2   | NA  | 1.4  | NA   |
| TRAF2 and NCK-interacting protein kinase                          | TNIK     | 100.0 | NA    | 2  | NA | 2  | NA | 2   | NA  | 0.0  | NA   |
| Msx2-interacting protein                                          | SPEN     | 100.0 | 100.0 | 3  | 2  | 3  | 2  | 13  | 16  | 0.0  | 0.0  |
| Isoform 2 of Hemicentin-1                                         | HMCN1    | 100.0 | NA    | 2  | NA | 2  | NA | 4   | NA  | 0.5  | NA   |
| Complement component C7                                           | C7       | 100.0 | 100.0 | 30 | 32 | 48 | 50 | 135 | 141 | 49.1 | 49.1 |
| Isoform 2 of Sodium/potassium-transporting ATPase subunit alpha-1 | ATP1A1   | 100.0 | NA    | 2  | NA | 2  | NA | 3   | NA  | 0.0  | NA   |
| Bone morphogenetic protein receptor type-2                        | BMPR2    | 100.0 | NA    | 2  | NA | 2  | NA | 3   | NA  | 3.3  | NA   |

|                                                     |          |       |       |    |    |    |    |     |     |      |      |
|-----------------------------------------------------|----------|-------|-------|----|----|----|----|-----|-----|------|------|
| Putative protein FAM71E2                            | FAM71E2  | 100.0 | NA    | 2  | NA | 2  | NA | 2   | NA  | 0.0  | NA   |
| Isoform 1B of Desmocollin-1                         | DSC1     | 100.0 | 100.0 | 2  | 2  | 2  | 2  | 3   | 3   | 3.0  | 2.7  |
| Isoform 3 of Acetyl-CoA carboxylase 1               | ACACA    | 100.0 | NA    | 2  | NA | 2  | NA | 6   | NA  | 1.5  | NA   |
| Ribosomal L1 domain-containing protein 1 (Fragment) | RSL1D1   | 100.0 | NA    | 2  | NA | 2  | NA | 2   | NA  | 4.0  | NA   |
| Isoform 2 of Cartilage acidic protein 1             | CRTAC1   | 100.0 | 100.0 | 7  | 7  | 8  | 9  | 8   | 11  | 16.3 | 16.3 |
| Glyoxylate reductase/hydroxypyruvate reductase      | GRHPR    | 100.0 | NA    | 2  | NA | 2  | NA | 2   | NA  | 0.0  | NA   |
| Complement C5                                       | C5       | 100.0 | 100.0 | 51 | 52 | 87 | 81 | 318 | 301 | 33.8 | 36.5 |
| Nuclear pore membrane glycoprotein 210              | NUP210   | 100.0 | NA    | 2  | NA | 2  | NA | 3   | NA  | 1.6  | NA   |
| Regulator of G-protein signaling 22                 | RGS22    | 100.0 | NA    | 2  | NA | 2  | NA | 2   | NA  | 0.0  | NA   |
| Complement C1q subcomponent subunit B               | C1QB     | 100.0 | 100.0 | 4  | 4  | 6  | 8  | 39  | 33  | 20.6 | 20.6 |
| Complement factor H-related protein 1               | CFHR1    | 100.0 | 100.0 | 5  | 5  | 8  | 7  | 19  | 16  | 45.8 | 33.6 |
| Isoform 2 of Uncharacterized protein C9orf174       | C9orf174 | 100.0 | 100.0 | 2  | 3  | 2  | 3  | 3   | 4   | 0.0  | 0.0  |
| General transcription factor 3C polypeptide 5       | GTF3C5   | 100.0 | 100.0 | 2  | 2  | 2  | 2  | 3   | 4   | 0.0  | 0.0  |
| Uncharacterized protein KIAA1210                    | KIAA1210 | 100.0 | NA    | 2  | NA | 2  | NA | 2   | NA  | 0.0  | NA   |
| L-lactate dehydrogenase B chain                     | LDHB     | 100.0 | 100.0 | 3  | 4  | 4  | 5  | 7   | 11  | 9.6  | 11.7 |
| Kinesin-like protein KIF11                          | KIF11    | 100.0 | NA    | 2  | NA | 2  | NA | 2   | NA  | 2.1  | NA   |
| KAT8 regulatory NSL complex subunit 2               | KANSL2   | 100.0 | NA    | 2  | NA | 2  | NA | 2   | NA  | 3.3  | NA   |
| Nucleolar transcription factor 1                    | UBTF     | 100.0 | 100.0 | 2  | 2  | 2  | 2  | 2   | 2   | 2.2  | 3.0  |
| Coiled-coil domain-containing protein 141           | CCDC141  | 100.0 | NA    | 2  | NA | 2  | NA | 3   | NA  | 0.0  | NA   |

|                                                           |         |       |       |       |    |     |     |      |      |      |      |
|-----------------------------------------------------------|---------|-------|-------|-------|----|-----|-----|------|------|------|------|
| Actin-binding protein anillin                             | ANLN    | 100.0 | NA    | 2     | NA | 2   | NA  | 2    | NA   | 2.8  | NA   |
| Isoform 3 of DmX-like protein 2                           | DMXL2   | 100.0 | 100.0 | 2     | 2  | 2   | 2   | 8    | 6    | 0.8  | 1.5  |
| Fetuin-B                                                  | FETUB   | 100.0 | 100.0 | 8     | 9  | 11  | 12  | 25   | 29   | 27.2 | 31.7 |
| Isoform 2 of Aminopeptidase O                             | AOPEP   | 100.0 | NA    | 3     | NA | 3   | NA  | 5    | NA   | 5.7  | NA   |
| Calpain-3                                                 | CAPN3   | 100.0 | NA    | 2     | NA | 2   | NA  | 2    | NA   | 5.4  | NA   |
| Dynein heavy chain 7, axonemal                            | DNAH7   | 100.0 | 100.0 | 4     | 3  | 4   | 3   | 5    | 5    | 0.0  | 0.0  |
| Adipocyte plasma membrane-associated protein (Fragment)   | APMAP   | 100.0 | 100.0 | 2     | 5  | 2   | 5   | 2    | 5    | 8.6  | 15.9 |
| Filaggrin                                                 | FLG     | 100.0 | 100.0 | 2     | 2  | 2   | 2   | 2    | 2    | 1.0  | 0.4  |
| Myosin-9                                                  | MYH9    | 100.0 | 100.0 | 2     | 2  | 2   | 2   | 2    | 4    | 2.8  | 2.0  |
| Serum amyloid A-1 protein                                 | SAA1    | 100.0 | 100.0 | 8     | 7  | 10  | 9   | 34   | 32   | 73.8 | 65.6 |
| Talin-1                                                   | TLN1    | 100.0 | NA    | 4     | NA | 4   | NA  | 4    | NA   | 2.4  | NA   |
| Keratin, type I cytoskeletal 13                           | KRT13   | 100.0 | 100.0 | 4     | 4  | 4   | 4   | 4    | 4    | 19.3 | 24.5 |
| Leucine-rich repeat and IQ domain-containing protein 3    | LRRIQ3  | 100.0 | 100.0 | 4     | 2  | 4   | 2   | 7    | 5    | 7.9  | 4.2  |
| DNA-directed RNA polymerase                               | POLR1B  | 100.0 | 100.0 | 2     | 2  | 2   | 2   | 4    | 6    | 2.4  | 2.1  |
| Fibulin-1                                                 | FBLN1   | 100.0 | 100.0 | 9     | 7  | 11  | 8   | 18   | 12   | 16.8 | 14.4 |
| Apolipoprotein B-100                                      | APOB    | 100.0 | 100.0 | ##### |    | 358 | 353 | 1638 | 1634 | 50.9 | 51.1 |
| Protein FAM179B                                           | FAM179B | 100.0 | 100.0 | 2     | 2  | 2   | 2   | 4    | 4    | 0.0  | 0.0  |
| Eukaryotic translation initiation factor 2-alpha kinase 4 | EIF2AK4 | 100.0 | NA    | 3     | NA | 3   | NA  | 3    | NA   | 1.7  | NA   |
| Keratin, type I cuticular Ha1                             | KRT31   | 100.0 | 100.0 | 5     | 5  | 6   | 6   | 6    | 6    | 12.7 | 13.5 |
| Bone morphogenetic protein 3                              | BMP3    | 100.0 | NA    | 2     | NA | 2   | NA  | 2    | NA   | 5.7  | NA   |
| Focadhesin                                                | FOCAD   | 100.0 | NA    | 2     | NA | 2   | NA  | 2    | NA   | 1.3  | NA   |
| Isoform 2 of E3 ubiquitin-protein ligase UBR4             | UBR4    | 100.0 | 100.0 | 4     | 2  | 4   | 2   | 6    | 4    | 0.0  | 0.0  |



|                                                                                       |           |       |       |    |    |     |     |     |     |      |      |
|---------------------------------------------------------------------------------------|-----------|-------|-------|----|----|-----|-----|-----|-----|------|------|
| Isoform 5 of Immunoglobulin-like and fibronectin type III domain-containing protein 1 | IGFN1     | 100.0 | 100.0 | 2  | 2  | 2   | 2   | 4   | 2   | 0.7  | 0.8  |
| Fibrinogen alpha chain                                                                | FGA       | 100.0 | 100.0 | 33 | 34 | 70  | 73  | 593 | 569 | 40.6 | 39.3 |
| Serine/threonine-protein kinase LMTK3                                                 | LMTK3     | 100.0 | NA    | 2  | NA | 2   | NA  | 2   | NA  | 2.2  | NA   |
| Isoform Beta of Apoptosis regulator BAX                                               | BAX       | 100.0 | 99.9  | 2  | 2  | 2   | 2   | 4   | 3   | 11.9 | 11.9 |
| Zinc finger CCHC domain-containing protein 3                                          | ZCCHC3    | 99.9  | NA    | 2  | NA | 2   | NA  | 2   | NA  | 0.0  | NA   |
| Hemoglobin subunit beta                                                               | HBB       | 100.0 | 100.0 | 7  | 6  | 11  | 10  | 29  | 23  | 59.9 | 53.7 |
| Protein Z-dependent protease inhibitor                                                | SERPINA10 | 100.0 | 100.0 | 10 | 11 | 11  | 15  | 21  | 24  | 25.4 | 27.1 |
| Putative DNA repair and recombination protein RAD26-like                              | RAD26L    | 100.0 | 100.0 | 2  | 2  | 2   | 2   | 2   | 2   | 0.0  | 0.0  |
| Spermatid-specific manchette-related protein 1                                        | SMRP1     | 100.0 | 100.0 | 2  | 2  | 2   | 2   | 3   | 3   | 12.6 | 12.6 |
| Nucleus accumbens-associated protein 2                                                | NACC2     | 100.0 | NA    | 2  | NA | 2   | NA  | 3   | NA  | 5.1  | NA   |
| Putative ATP-dependent RNA helicase DHX30                                             | DHX30     | 100.0 | NA    | 2  | NA | 2   | NA  | 2   | NA  | 2.3  | NA   |
| Aggrecan core protein                                                                 | ACAN      | 100.0 | NA    | 2  | NA | 2   | NA  | 3   | NA  | 0.5  | NA   |
| Uncharacterized protein FLJ46347                                                      |           | 100.0 | 100.0 | 2  | 2  | 2   | 2   | 3   | 2   | 4.8  | 0.0  |
| Complement factor H                                                                   | CFH       | 100.0 | 100.0 | 60 | 60 | 124 | 117 | 689 | 718 | 59.1 | 55.9 |
| Isoform 5 of WD and tetratricopeptide repeats protein 1                               | WDTC1     | 100.0 | NA    | 2  | NA | 2   | NA  | 2   | NA  | 3.9  | NA   |
| Isoform 2 of Janus kinase and microtubule-interacting protein 2                       | JAKMIP2   | 100.0 | 100.0 | 2  | 2  | 3   | 3   | 3   | 3   | 3.0  | 4.1  |
| Pre-mRNA-splicing factor ATP-dependent RNA helicase PRP16                             | DHX38     | 100.0 | 100.0 | 2  | 4  | 2   | 4   | 2   | 4   | 2.6  | 0.0  |
| POTE ankyrin domain family member                                                     | POTED     | 100.0 | NA    | 2  |    | 2   |     | 3   | NA  | 5.0  | NA   |

| D                                                            |          |       |       | NA    | NA |     |     |      |      |      |      |  |
|--------------------------------------------------------------|----------|-------|-------|-------|----|-----|-----|------|------|------|------|--|
| Plexin domain-containing protein 2                           | PLXDC2   | 100.0 | 100.0 | 3     | 4  | 3   | 4   | 5    | 5    | 7.6  | 9.5  |  |
| Isoform 2 of Glycogen phosphorylase, muscle form             | PYGM     | 100.0 | NA    | 2     | NA | 2   | NA  | 2    | NA   | 0.0  | NA   |  |
| Kinesin-like protein KIFC3                                   | KIFC3    | 100.0 | NA    | 2     | NA | 2   | NA  | 2    | NA   | 4.4  | NA   |  |
| Death-inducer obliterator 1                                  | DIDO1    | 100.0 | 100.0 | 2     | 2  | 2   | 2   | 3    | 2    | 0.0  | 0.0  |  |
| Plasma serine protease inhibitor                             | SERPINA5 | 100.0 | 100.0 | 11    | 13 | 18  | 20  | 44   | 48   | 29.1 | 32.3 |  |
| Isoform 4 of Coiled-coil domain-containing protein 88B       | CCDC88B  | 100.0 | 100.0 | 2     | 2  | 2   | 2   | 3    | 2    | 2.1  | 1.6  |  |
| Isoform 2 of Spectrin beta chain, erythrocytic               | SPTB     | 100.0 | NA    | 2     | NA | 2   | NA  | 2    | NA   | 0.0  | NA   |  |
| Isoform 3 of CDK5 regulatory subunit-associated protein 1    | CDK5RAP1 | 100.0 | 99.9  | 2     | 2  | 2   | 2   | 3    | 2    | 5.3  | 0.0  |  |
| Anaphase-promoting complex subunit 1                         | ANAPC1   | 100.0 | NA    | 2     | NA | 2   | NA  | 3    | NA   | 0.0  | NA   |  |
| Complement C3                                                | C3       | 100.0 | 100.0 | ##### |    | 263 | 261 | 3192 | 3033 | 71.9 | 72.1 |  |
| Isoform 2 of Collagen alpha-3(IV) chain                      | COL4A3   | 100.0 | NA    | 2     | NA | 2   | NA  | 2    | NA   | 1.8  | NA   |  |
| Protein pitchfork                                            | PIFO     | 100.0 | NA    | 2     | NA | 2   | NA  | 2    | NA   | 5.8  | NA   |  |
| Basal cell adhesion molecule                                 | BCAM     | 100.0 | NA    | 2     | NA | 2   | NA  | 2    | NA   | 6.2  | NA   |  |
| Protein very KIND                                            | KNDC1    | 100.0 | NA    | 3     | NA | 3   | NA  | 8    | NA   | 1.9  | NA   |  |
| Methylcrotonoyl-CoA carboxylase subunit alpha, mitochondrial | MCCC1    | 100.0 | NA    | 2     | NA | 2   | NA  | 2    | NA   | 0.0  | NA   |  |
| Isoform 2 of Spermatogenesis-associated protein 20           | SPATA20  | 100.0 | NA    | 2     | NA | 2   | NA  | 2    | NA   | 2.5  | NA   |  |
| Tetratricopeptide repeat protein 40                          | TTC40    | 100.0 | NA    | 2     | NA | 2   | NA  | 5    | NA   | 0.7  | NA   |  |

|                                                                    |        |       |       |    |    |     |     |     |     |      |      |
|--------------------------------------------------------------------|--------|-------|-------|----|----|-----|-----|-----|-----|------|------|
| Probable E3 ubiquitin-protein ligase MYCBP2                        | MYCBP2 | 100.0 | 100.0 | 2  | 2  | 2   | 2   | 3   | 4   | 0.5  | 0.4  |
| Inositol 1,4,5-trisphosphate receptor type 3                       | ITPR3  | 100.0 | NA    | 2  | NA | 2   | NA  | 2   | NA  | 0.9  | NA   |
| Lymphatic vessel endothelial hyaluronic acid receptor 1            | LYVE1  | 100.0 | 100.0 | 5  | 5  | 8   | 8   | 13  | 18  | 14.3 | 14.3 |
| Isoform 4 of WW domain-containing adapter protein with coiled-coil | WAC    | 100.0 | NA    | 2  | NA | 2   | NA  | 5   | NA  | 0.0  | NA   |
| Spectrin beta chain, non-erythrocytic 5                            | SPTBN5 | 100.0 | NA    | 3  | NA | 3   | NA  | 3   | NA  | 1.1  | NA   |
| Isoform Beta-4B of Integrin beta-4                                 | ITGB4  | 100.0 | NA    | 2  | NA | 2   | NA  | 2   | NA  | 0.0  | NA   |
| Isoform 14 of Fibronectin                                          | FN1    | 100.0 | 100.0 | 61 | 60 | 106 | 104 | 470 | 453 | 41.8 | 41.0 |
| F-box only protein 10                                              | FBXO10 | 100.0 | 99.9  | 2  | 2  | 2   | 2   | 3   | 2   | 0.0  | 0.0  |
| Ephrin type-B receptor 1                                           | EPHB1  | 100.0 | NA    | 2  | NA | 2   | NA  | 2   | NA  | 2.9  | NA   |
| Insulin-like growth factor-binding protein 4                       | IGFBP4 | 100.0 | NA    | 2  | NA | 2   | NA  | 2   | NA  | 7.8  | NA   |
| Complement component C8 gamma chain                                | C8G    | 100.0 | 100.0 | 8  | 9  | 12  | 12  | 51  | 53  | 49.0 | 55.0 |
| Isoform 2 of Chromodomain-helicase-DNA-binding protein 8           | CHD8   | 100.0 | NA    | 2  | NA | 2   | NA  | 2   | NA  | 0.7  | NA   |
| Speckle-type POZ protein-like                                      | SPOPL  | 100.0 | NA    | 2  | NA | 2   | NA  | 2   | NA  | 0.0  | NA   |
| Poly [ADP-ribose] polymerase 14                                    | PARP14 | 100.0 | NA    | 2  | NA | 2   | NA  | 2   | NA  | 0.0  | NA   |
| Chromodomain-helicase-DNA-binding protein 2                        | CHD2   | 100.0 | NA    | 3  | NA | 3   | NA  | 3   | NA  | 3.5  | NA   |
| Cadherin-5                                                         | CDH5   | 100.0 | 100.0 | 4  | 6  | 4   | 7   | 9   | 9   | 5.9  | 8.9  |
| Monocyte differentiation antigen CD14                              | CD14   | 100.0 | 100.0 | 9  | 7  | 13  | 11  | 30  | 28  | 29.6 | 22.7 |
| Caspase-14                                                         | CASP14 | 100.0 | 100.0 | 2  | 3  | 2   | 3   | 5   | 4   | 12.8 | 18.6 |
| DNA polymerase theta                                               | POLQ   | 100.0 | NA    | 2  |    | 2   |     | 4   | NA  | 1.2  | NA   |

|                                                          |          |       |       |    |    |    |    |     |     |      |      |
|----------------------------------------------------------|----------|-------|-------|----|----|----|----|-----|-----|------|------|
|                                                          |          |       |       |    | NA |    | NA |     |     |      |      |
| Vitamin K-dependent protein C heavy chain                | PROC     | 100.0 | 100.0 | 8  | 7  | 11 | 8  | 26  | 25  | 22.5 | 23.0 |
| Coiled-coil domain-containing protein 67                 | CCDC67   | 100.0 | NA    | 2  | NA | 2  | NA | 2   | NA  | 0.0  | NA   |
| Prickle-like protein 2                                   | PRICKLE2 | 100.0 | NA    | 2  | NA | 2  | NA | 3   | NA  | 0.0  | NA   |
| Zinc finger protein 831                                  | ZNF831   | 100.0 | NA    | 2  | NA | 2  | NA | 2   | NA  | 0.0  | NA   |
| Pre-mRNA-splicing factor SYF1                            | XAB2     | 100.0 | NA    | 3  | NA | 3  | NA | 3   | NA  | 0.0  | NA   |
| Very low-density lipoprotein receptor                    | VLDLR    | 100.0 | 100.0 | 3  | 2  | 3  | 2  | 3   | 2   | 4.8  | 2.8  |
| Isoform 2 of E3 ubiquitin-protein ligase HUWE1           | HUWE1    | 100.0 | 100.0 | 3  | 4  | 3  | 4  | 5   | 6   | 0.0  | 0.0  |
| Intercellular adhesion molecule 2                        | ICAM2    | 100.0 | 100.0 | 2  | 3  | 3  | 6  | 5   | 9   | 11.3 | 14.9 |
| Complement C1r subcomponent                              | C1R      | 100.0 | 100.0 | 22 | 23 | 38 | 39 | 120 | 119 | 40.0 | 41.1 |
| Trinucleotide repeat-containing gene 18 protein          | TNRC18   | 100.0 | NA    | 2  | NA | 2  | NA | 2   | NA  | 0.0  | NA   |
| Pleckstrin homology domain-containing family G member 4B | PLEKHG4B | 100.0 | NA    | 2  | NA | 2  | NA | 3   | NA  | 1.9  | NA   |
| Periplakin                                               | PPL      | 100.0 | NA    | 3  | NA | 3  | NA | 3   | NA  | 0.0  | NA   |
| Plasma kallikrein heavy chain (Fragment)                 | KLKB1    | 100.0 | 100.0 | 26 | 25 | 41 | 39 | 143 | 133 | 40.5 | 42.3 |
| Coagulation factor XI                                    | F11      | 100.0 | 100.0 | 14 | 16 | 18 | 24 | 21  | 29  | 24.0 | 31.0 |
| Isoform 2 of Myotubularin-related protein 12             | MTMR12   | 100.0 | NA    | 2  | NA | 2  | NA | 2   | NA  | 4.2  | NA   |
| Isoform 2 of Transcription factor 20                     | TCF20    | 100.0 | NA    | 3  | NA | 3  | NA | 6   | NA  | 0.0  | NA   |
| Cartilage intermediate layer protein 1                   | CILP     | 100.0 | 100.0 | 2  | 2  | 2  | 3  | 2   | 4   | 0.0  | 2.7  |
| Dedicator of cytokinesis protein 2                       | DOCK2    | 100.0 | NA    | 2  | NA | 2  | NA | 3   | NA  | 0.0  | NA   |

|                                                                        |         |       |       |    |    |     |     |      |      |      |      |
|------------------------------------------------------------------------|---------|-------|-------|----|----|-----|-----|------|------|------|------|
| Insulin receptor substrate 4                                           | IRS4    | 100.0 | 100.0 | 2  | 2  | 2   | 2   | 2    | 2    | 2.0  | 1.4  |
| Plasminogen                                                            | PLG     | 100.0 | 100.0 | 36 | 38 | 72  | 73  | 360  | 350  | 60.5 | 59.8 |
| Isoform 2 of Autoimmune regulator                                      | AIRE    | 100.0 | NA    | 2  | NA | 2   | NA  | 2    | NA   | 0.0  | NA   |
| AT-rich interactive domain-containing protein 1A                       | ARID1A  | 100.0 | 100.0 | 2  | 3  | 2   | 3   | 2    | 4    | 1.1  | 3.2  |
| Endoplasmic reticulum chaperone protein                                | HSP90B1 | 100.0 | 100.0 | 2  | 3  | 2   | 3   | 2    | 3    | 3.5  | 4.5  |
| Isoform 4 of Extracellular matrix protein 1                            | ECM1    | 100.0 | 100.0 | 16 | 17 | 17  | 20  | 32   | 34   | 37.6 | 35.4 |
| Isoform 2 of ALS2 C-terminal-like protein                              | ALS2CL  | 100.0 | NA    | 3  | NA | 3   | NA  | 3    | NA   | 4.5  | NA   |
| Utrophin                                                               | UTRN    | 100.0 | 100.0 | 3  | 3  | 3   | 3   | 3    | 4    | 0.0  | 0.0  |
| Creatine kinase M-type                                                 | CKM     | 100.0 | NA    | 2  | NA | 2   | NA  | 3    | NA   | 6.0  | NA   |
| Isoform 2 of LON peptidase N-terminal domain and RING finger protein 3 | LONRF3  | 100.0 | 100.0 | 3  | 2  | 3   | 2   | 7    | 2    | 6.0  | 0.0  |
| Isoform 2 of Ig mu chain C region                                      | IGHM    | 100.0 | 100.0 | 13 | 13 | 18  | 18  | 39   | 39   | 31.9 | 30.2 |
| Receptor-type tyrosine-protein phosphatase eta                         | PTPRJ   | 100.0 | 100.0 | 3  | 4  | 4   | 4   | 7    | 4    | 3.2  | 5.2  |
| Isoform 11 of Amyloid beta A4 protein                                  | APP     | 100.0 | 100.0 | 2  | 3  | 2   | 3   | 2    | 3    | 3.4  | 5.2  |
| Angiogenin                                                             | ANG     | 100.0 | 100.0 | 3  | 3  | 3   | 3   | 6    | 6    | 26.5 | 26.5 |
| Folliculin-interacting protein 1                                       | FNIP1   | 100.0 | 100.0 | 2  | 2  | 2   | 2   | 2    | 4    | 0.0  | 1.1  |
| L-lactate dehydrogenase                                                | LDHA    | 100.0 | 100.0 | 2  | 2  | 2   | 2   | 2    | 3    | 5.9  | 5.7  |
| Alpha-2-macroglobulin                                                  | A2M     | 100.0 | 100.0 | 65 | 65 | 168 | 163 | 3553 | 3418 | 58.1 | 57.5 |
| SPARC-like protein 1                                                   | SPARCL1 | 100.0 | 100.0 | 2  | 3  | 2   | 3   | 6    | 6    | 3.6  | 5.0  |
| Conserved oligomeric Golgi complex subunit 6                           | COG6    | 100.0 | NA    | 2  | NA | 2   | NA  | 2    | NA   | 0.0  | NA   |
| Rho-associated protein kinase 1                                        | ROCK1   | 100.0 | NA    | 2  | NA | 2   | NA  | 2    | NA   | 1.2  | NA   |
| Oxytocin-neurophysin 1                                                 | OXT     | 100.0 | NA    | 2  | NA | 2   | NA  | 2    | NA   | 25.6 | NA   |

|                                                                                     |          |       |       |    |    |    |    |     |     |      |      |
|-------------------------------------------------------------------------------------|----------|-------|-------|----|----|----|----|-----|-----|------|------|
| TSC22 domain family protein 4                                                       | TSC22D4  | 100.0 | NA    | 2  | NA | 2  | NA | 2   | NA  | 6.1  | NA   |
| Thrombospondin-1                                                                    | THBS1    | 100.0 | 100.0 | 28 | 26 | 41 | 38 | 83  | 80  | 29.5 | 28.3 |
| Isoform 2 of Insulin-like growth factor-binding protein complex acid labile subunit | IGFALS   | 100.0 | 100.0 | 17 | 18 | 27 | 27 | 94  | 92  | 34.5 | 35.8 |
| Reticulon-4 receptor (Fragment)                                                     | RTN4R    | 100.0 | NA    | 2  | NA | 2  | NA | 2   | NA  | 3.7  | NA   |
| Fructose-bisphosphate aldolase A                                                    | ALDOA    | 100.0 | 100.0 | 2  | 3  | 2  | 3  | 2   | 4   | 7.7  | 9.9  |
| Isoform 2 of Telomere-associated protein RIF1                                       | RIF1     | 100.0 | NA    | 2  | NA | 2  | NA | 3   | NA  | 0.0  | NA   |
| Eukaryotic peptide chain release factor subunit 1                                   | ETF1     | 100.0 | NA    | 2  | NA | 2  | NA | 2   | NA  | 5.0  | NA   |
| Unconventional myosin-1e                                                            | MYO1E    | 100.0 | 100.0 | 2  | 3  | 2  | 3  | 3   | 4   | 2.5  | 0.0  |
| Isoform 2 of EGF-containing fibulin-like extracellular matrix protein 1             | EFEMP1   | 100.0 | 100.0 | 3  | 4  | 5  | 5  | 7   | 7   | 8.3  | 10.3 |
| Histidine-rich glycoprotein                                                         | HRG      | 100.0 | 100.0 | 16 | 17 | 27 | 28 | 169 | 176 | 34.9 | 36.4 |
| Glutamate--cysteine ligase catalytic subunit                                        | GCLC     | 99.9  | NA    | 2  | NA | 2  | NA | 2   | NA  | 4.1  | NA   |
| Cytochrome P450 1B1                                                                 | CYP1B1   | 100.0 | NA    | 2  | NA | 2  | NA | 2   | NA  | 3.7  | NA   |
| Beta-Ala-His dipeptidase                                                            | CNDP1    | 100.0 | 100.0 | 15 | 14 | 20 | 18 | 38  | 35  | 38.3 | 34.3 |
| CASP8-associated protein 2                                                          | CASP8AP2 | 100.0 | NA    | 2  | NA | 2  | NA | 2   | NA  | 0.0  | NA   |
| Serum amyloid A-4 protein                                                           | SAA4     | 100.0 | 100.0 | 6  | 6  | 11 | 10 | 53  | 51  | 46.9 | 46.9 |
| Desmoplakin                                                                         | DSP      | 100.0 | 100.0 | 10 | 11 | 11 | 12 | 12  | 16  | 4.2  | 4.5  |
| Isoform 2 of Annexin A2                                                             | ANXA2    | 100.0 | NA    | 2  | NA | 2  | NA | 2   | NA  | 5.6  | NA   |
| Isoform 2 of Synaptopodin-2                                                         | SYNPO2   | 100.0 | NA    | 2  | NA | 2  | NA | 2   | NA  | 1.9  | NA   |
| Chondroitin sulfate proteoglycan 4                                                  | CSPG4    | 100.0 | 100.0 | 3  | 2  | 3  | 2  | 3   | 2   | 1.8  | 0.0  |
| Zinc finger protein basonuclin-2                                                    | BNC2     | 100.0 | NA    | 2  |    | 3  |    | 10  | NA  | 1.9  | NA   |

|                                                                            |          |       |       |    |    |    |    |     |     |      |      |
|----------------------------------------------------------------------------|----------|-------|-------|----|----|----|----|-----|-----|------|------|
|                                                                            |          |       |       |    | NA |    | NA |     |     |      |      |
| Lysosome-associated membrane glycoprotein 2                                | LAMP2    | 100.0 | 100.0 | 2  | 2  | 2  | 3  | 5   | 8   | 5.5  | 4.9  |
| DNA polymerase zeta catalytic subunit                                      | REV3L    | 100.0 | NA    | 2  | NA | 2  | NA | 2   | NA  | 0.6  | NA   |
| Kallistatin                                                                | SERPINA4 | 100.0 | 100.0 | 18 | 18 | 30 | 27 | 121 | 119 | 44.7 | 44.7 |
| Ribosome-binding protein 1                                                 | RRBP1    | 100.0 | 100.0 | 2  | 2  | 2  | 2  | 2   | 6   | 0.0  | 0.0  |
| Maestro heat-like repeat-containing protein family member 2B               | MROH2B   | 100.0 | NA    | 2  | NA | 2  | NA | 2   | NA  | 1.2  | NA   |
| Immunoglobulin J chain (Fragment)                                          | IGJ      | 100.0 | NA    | 2  | NA | 2  | NA | 2   | NA  | 12.7 | NA   |
| Ankyrin repeat domain-containing protein 30A                               | ANKRD30A | 100.0 | NA    | 2  | NA | 2  | NA | 2   | NA  | 1.8  | NA   |
| Probable cation-transporting ATPase 13A3                                   | ATP13A3  | 100.0 | NA    | 2  | NA | 2  | NA | 4   | NA  | 0.0  | NA   |
| Arf-GAP with Rho-GAP domain, ANK repeat and PH domain-containing protein 1 | ARAP1    | 100.0 | NA    | 2  | NA | 2  | NA | 3   | NA  | 0.0  | NA   |
| Hornerin                                                                   | HRNR     | 100.0 | 100.0 | 6  | 4  | 6  | 4  | 9   | 13  | 4.2  | 3.4  |
| Isoform 2 of RRP12-like protein                                            | RRP12    | 100.0 | 100.0 | 2  | 2  | 2  | 2  | 2   | 2   | 1.5  | 0.0  |
| Condensin complex subunit 1                                                | NCAPD2   | 100.0 | 100.0 | 4  | 2  | 4  | 2  | 5   | 3   | 2.9  | 1.8  |
| Obscurin-like protein 1                                                    | OBSL1    | 100.0 | NA    | 2  | NA | 2  | NA | 3   | NA  | 1.3  | NA   |
| Usherin                                                                    | USH2A    | 100.0 | 100.0 | 2  | 2  | 2  | 2  | 2   | 2   | 0.4  | 0.0  |
| Leucine-rich repeat and death domain-containing protein 1                  | LRRD1    | 100.0 | 100.0 | 2  | 2  | 2  | 2  | 2   | 2   | 0.0  | 0.0  |
| Zinc finger protein 106                                                    | ZNF106   | 100.0 | NA    | 2  | NA | 2  | NA | 2   | NA  | 0.9  | NA   |
| BPI fold-containing family A member 1                                      | BPIFA1   | 100.0 | 100.0 | 3  | 3  | 5  | 4  | 6   | 4   | 13.7 | 15.6 |
| Isoform A of Endothelin-converting enzyme 1                                | ECE1     | 100.0 | 100.0 | 2  | 2  | 2  | 2  | 3   | 3   | 0.0  | 0.0  |

|                                                       |        |       |       |    |    |    |    |     |     |      |      |
|-------------------------------------------------------|--------|-------|-------|----|----|----|----|-----|-----|------|------|
| Inter-alpha-trypsin inhibitor heavy chain H1          | ITIH1  | 100.0 | 100.0 | 21 | 21 | 47 | 48 | 347 | 310 | 30.8 | 29.0 |
| Keratin, type II cytoskeletal 4                       | KRT4   | 100.0 | 100.0 | 4  | 8  | 6  | 11 | 7   | 12  | 13.4 | 20.6 |
| Isoform 2 of A-kinase anchor protein SPHKAP           | SPHKAP | 100.0 | NA    | 2  | NA | 2  | NA | 2   | NA  | 1.6  | NA   |
| VWFA and cache domain-containing protein 1            | CACHD1 | 100.0 | NA    | 2  | NA | 2  | NA | 2   | NA  | 1.4  | NA   |
| Prolow-density lipoprotein receptor-related protein 1 | LRP1   | 100.0 | 100.0 | 2  | 3  | 2  | 3  | 2   | 3   | 0.5  | 0.7  |
| Receptor-type tyrosine-protein phosphatase gamma      | PTPRG  | 100.0 | 100.0 | 2  | 2  | 2  | 2  | 5   | 4   | 1.9  | 2.0  |
| Beta-2-microglobulin                                  | B2M    | 100.0 | 100.0 | 2  | 2  | 2  | 2  | 7   | 7   | 16.8 | 16.8 |
| Aminopeptidase N                                      | ANPEP  | 100.0 | 100.0 | 7  | 7  | 7  | 8  | 7   | 9   | 10.4 | 10.7 |
| Dipeptidase 2                                         | DPEP2  | 100.0 | NA    | 2  | NA | 2  | NA | 2   | NA  | 6.6  | NA   |
| Ryanodine receptor 2                                  | RYR2   | 100.0 | NA    | 2  | NA | 2  | NA | 2   | NA  | 0.0  | NA   |
| Carboxypeptidase N catalytic chain                    | CPN1   | 100.0 | 100.0 | 11 | 12 | 14 | 14 | 39  | 47  | 28.2 | 34.5 |
| Haptoglobin                                           | HP     | 100.0 | 100.0 | 12 | 15 | 23 | 26 | 65  | 61  | 33.0 | 44.6 |
| Dipeptidyl peptidase 4                                | DPP4   | 100.0 | 100.0 | 4  | 4  | 4  | 4  | 4   | 4   | 5.1  | 5.5  |
| Keratin, type I cytoskeletal 16                       | KRT16  | 100.0 | 100.0 | 7  | 8  | 7  | 9  | 11  | 12  | 32.6 | 42.1 |
| Matrix metalloproteinase-9                            | MMP9   | 100.0 | 100.0 | 2  | 2  | 4  | 3  | 6   | 5   | 3.7  | 3.7  |
| Mannose-binding protein C                             | MBL2   | 100.0 | 100.0 | 6  | 8  | 8  | 10 | 13  | 17  | 33.1 | 36.3 |
| Cell division cycle 7-related protein kinase          | CDC7   | 100.0 | NA    | 2  | NA | 2  | NA | 3   | NA  | 0.0  | NA   |
| ERO1-like protein beta                                | ERO1LB | 100.0 | NA    | 2  | NA | 2  | NA | 2   | NA  | 5.6  | NA   |
| Isoform 3 of Protein Jumonji                          | JARID2 | 100.0 | 100.0 | 2  | 2  | 2  | 2  | 2   | 2   | 3.1  | 0.0  |
| Acyl-CoA synthetase family member 2, mitochondrial    | ACSF2  | 99.9  | NA    | 2  | NA | 2  | NA | 2   | NA  | 0.0  | NA   |
| C-reactive protein                                    | CRP    | 100.0 | 100.0 | 6  | 5  | 8  | 8  | 17  | 14  | 24.6 | 21.0 |



|                                                                  |          |       |       |    |    |    |    |     |     |      |      |
|------------------------------------------------------------------|----------|-------|-------|----|----|----|----|-----|-----|------|------|
| 1-phosphatidylinositol 3-phosphate 5-kinase                      | PIKFYVE  | 100.0 | NA    | 2  | NA | 2  | NA | 2   | NA  | 1.0  | NA   |
| Dynein heavy chain 10, axonemal                                  | DNAH10   | 100.0 | 100.0 | 2  | 2  | 2  | 2  | 3   | 2   | 0.7  | 0.8  |
| Isoform 3 of Zinc finger protein 541                             | ZNF541   | 100.0 | NA    | 2  | NA | 2  | NA | 2   | NA  | 0.0  | NA   |
| Myomesin-2                                                       | MYOM2    | 100.0 | 100.0 | 4  | 2  | 4  | 2  | 4   | 2   | 4.0  | 1.8  |
| Biotinidase                                                      | BTD      | 100.0 | 100.0 | 10 | 10 | 13 | 14 | 38  | 31  | 23.7 | 23.7 |
| Dermcidin                                                        | DCD      | 100.0 | 100.0 | 5  | 5  | 7  | 6  | 15  | 18  | 42.7 | 42.7 |
| F-box/WD repeat-containing protein 1A                            | BTRC     | 100.0 | NA    | 2  | NA | 2  | NA | 3   | NA  | 4.8  | NA   |
| Vascular cell adhesion protein 1                                 | VCAM1    | 100.0 | 100.0 | 4  | 3  | 4  | 3  | 4   | 3   | 7.0  | 5.1  |
| Low-density lipoprotein receptor-related protein 1B              | LRP1B    | 100.0 | 100.0 | 2  | 2  | 2  | 2  | 3   | 2   | 0.4  | 0.4  |
| Coagulation factor V                                             | F5       | 100.0 | 100.0 | 33 | 2  | 40 | 3  | 71  | 4   | 17.6 | 0.0  |
| Coatomer subunit gamma-1                                         | COPG1    | 100.0 | 100.0 | 3  | 3  | 3  | 3  | 3   | 3   | 0.0  | 0.0  |
| UPF0505 protein C16orf62                                         | C16orf62 | 100.0 | NA    | 2  | NA | 2  | NA | 3   | NA  | 0.0  | NA   |
| Isoform 2 of Nitric oxide synthase, brain                        | NOS1     | 100.0 | NA    | 2  | NA | 2  | NA | 2   | NA  | 1.7  | NA   |
| Isoform Gamma-A of Fibrinogen gamma chain                        | FGG      | 100.0 | 100.0 | 24 | 23 | 48 | 46 | 322 | 295 | 58.8 | 58.8 |
| Zinc finger protein 816                                          | ZNF816   | 100.0 | NA    | 4  | NA | 4  | NA | 5   | NA  | 0.0  | NA   |
| Isoform 2 of Cholesteryl ester transfer protein                  | CETP     | 100.0 | 100.0 | 4  | 4  | 6  | 8  | 9   | 11  | 11.5 | 11.5 |
| Isoform 2 of Haptoglobin-related protein                         | HPR      | 100.0 | 100.0 | 3  | 4  | 3  | 4  | 6   | 6   | 24.2 | 31.2 |
| RING finger protein 39                                           | RNF39    | 100.0 | NA    | 2  | NA | 2  | NA | 2   | NA  | 5.7  | NA   |
| CLIP-associating protein 1                                       | CLASP1   | 100.0 | 100.0 | 3  | 2  | 3  | 2  | 6   | 5   | 0.0  | 0.0  |
| Isoform 2 of EF-hand calcium-binding domain-containing protein 5 | EFCAB5   | 100.0 | 100.0 | 2  | 2  | 2  | 2  | 2   | 2   | 0.0  | 2.2  |

|                                                              |          |       |       |    |    |    |    |     |     |      |      |
|--------------------------------------------------------------|----------|-------|-------|----|----|----|----|-----|-----|------|------|
| Isoform 4 of Protein sidekick-2                              | SDK2     | 100.0 | NA    | 2  | NA | 2  | NA | 2   | NA  | 0.0  | NA   |
| Oxysterol-binding protein-related protein 10                 | OSBPL10  | 100.0 | NA    | 2  | NA | 2  | NA | 2   | NA  | 0.0  | NA   |
| Glutathione peroxidase 3                                     | GPX3     | 100.0 | 100.0 | 4  | 4  | 9  | 8  | 33  | 24  | 21.7 | 21.7 |
| Complement C1s subcomponent                                  | C1S      | 100.0 | 100.0 | 20 | 20 | 37 | 35 | 105 | 107 | 40.0 | 40.0 |
| Complement factor B                                          | CFB      | 100.0 | 100.0 | 49 | 53 | 83 | 85 | 414 | 412 | 42.2 | 47.6 |
| Protein FAM208A                                              | FAM208A  | 100.0 | NA    | 2  | NA | 2  | NA | 3   | NA  | 2.2  | NA   |
| S1 RNA-binding domain-containing protein 1                   | SRBD1    | 100.0 | NA    | 2  | NA | 2  | NA | 2   | NA  | 2.9  | NA   |
| THO complex subunit 4                                        | ALYREF   | 100.0 | NA    | 3  | NA | 3  | NA | 3   | NA  | 19.1 | NA   |
| Isoform 5 of Nuclear receptor coactivator 3                  | NCOA3    | 100.0 | NA    | 2  | NA | 2  | NA | 2   | NA  | 1.9  | NA   |
| Cytoplasmic dynein 1 heavy chain 1                           | DYNC1H1  | 100.0 | 100.0 | 2  | 2  | 2  | 2  | 5   | 2   | 0.5  | 0.0  |
| Tau-tubulin kinase 1                                         | TTBK1    | 100.0 | 100.0 | 2  | 2  | 2  | 2  | 2   | 2   | 1.7  | 0.0  |
| Fibrinogen beta chain                                        | FGB      | 100.0 | 100.0 | 28 | 27 | 62 | 62 | 393 | 418 | 67.0 | 67.0 |
| TSNARE1 protein                                              | TSNARE1  | 100.0 | NA    | 2  | NA | 2  | NA | 3   | NA  | 4.3  | NA   |
| Isoform 2 of Structural maintenance of chromosomes protein 6 | SMC6     | 100.0 | 100.0 | 2  | 3  | 2  | 3  | 2   | 4   | 0.0  | 0.0  |
| Zinc finger and BTB domain-containing protein 48             | ZBTB48   | 100.0 | 100.0 | 2  | 2  | 2  | 2  | 2   | 2   | 0.0  | 0.0  |
| V-type proton ATPase 116 kDa subunit a isoform 2             | ATP6V0A2 | 100.0 | NA    | 2  | NA | 2  | NA | 2   | NA  | 4.0  | NA   |
| Isoform 3 of ER membrane protein complex subunit 1           | EMC1     | 99.9  | NA    | 2  | NA | 2  | NA | 2   | NA  | 0.0  | NA   |
| Centromere protein I                                         | CENPI    | 100.0 | NA    | 2  | NA | 3  | NA | 4   | NA  | 3.9  | NA   |
| Sortilin-related receptor                                    | SORL1    | 100.0 | NA    | 2  | NA | 2  | NA | 2   | NA  | 1.9  | NA   |

|                                                                              |          |       |       |    |    |    |    |     |     |      |      |
|------------------------------------------------------------------------------|----------|-------|-------|----|----|----|----|-----|-----|------|------|
| Arf-GAP with Rho-GAP domain, ANK repeat and PH domain-containing protein 2   | ARAP2    | 100.0 | NA    | 2  | NA | 2  | NA | 3   | NA  | 0.0  | NA   |
| Vitronectin                                                                  | VTN      | 100.0 | 100.0 | 10 | 11 | 22 | 25 | 145 | 152 | 23.2 | 24.9 |
| Complement component C8 alpha chain                                          | C8A      | 100.0 | 100.0 | 13 | 14 | 23 | 23 | 69  | 93  | 33.0 | 33.0 |
| Isoform 2 of 6-phosphofructokinase, liver type                               | PFKL     | 100.0 | 100.0 | 2  | 2  | 2  | 2  | 2   | 2   | 3.5  | 3.6  |
| Isoform 3 of Acyl-CoA synthetase family member 4                             | AASDH    | 100.0 | NA    | 2  | NA | 2  | NA | 3   | NA  | 3.3  | NA   |
| Angiotensinogen                                                              | AGT      | 100.0 | 100.0 | 10 | 12 | 18 | 20 | 93  | 99  | 20.4 | 25.6 |
| Keratin, type II cytoskeletal 5                                              | KRT5     | 100.0 | 100.0 | 16 | 2  | 21 | 2  | 35  | 2   | 0.0  | 0.0  |
| Protein dpy-19 homolog 1                                                     | DPY19L1  | 100.0 | 100.0 | 2  | 2  | 2  | 2  | 2   | 3   | 4.6  | 4.6  |
| Phosphatidylinositol 4-phosphate 3-kinase C2 domain-containing subunit alpha | PIK3C2A  | 100.0 | NA    | 2  | NA | 2  | NA | 2   | NA  | 0.0  | NA   |
| von Willebrand factor                                                        | VWF      | 100.0 | 100.0 | 14 | 24 | 17 | 25 | 32  | 46  | 6.8  | 11.2 |
| TNFAIP3-interacting protein 2                                                | TNIP2    | 100.0 | 100.0 | 2  | 2  | 2  | 2  | 3   | 6   | 0.0  | 0.0  |
| Complement factor I                                                          | CFI      | 100.0 | 100.0 | 18 | 19 | 28 | 29 | 94  | 92  | 34.1 | 34.3 |
| Isoform 4 of Receptor-type tyrosine-protein phosphatase N2                   | PTPRN2   | 100.0 | 100.0 | 2  | 2  | 3  | 2  | 5   | 3   | 2.9  | 2.9  |
| Isoform 3 of Collagen alpha-1(XVIII) chain                                   | COL18A1  | 100.0 | NA    | 2  | NA | 2  | NA | 2   | NA  | 0.0  | NA   |
| Rab GDP dissociation inhibitor beta                                          | GDI2     | 100.0 | 100.0 | 2  | 2  | 2  | 2  | 2   | 2   | 6.7  | 6.7  |
| Protein YIPF3 (Fragment)                                                     | YIPF3    | 100.0 | NA    | 2  | NA | 2  | NA | 2   | NA  | 8.0  | NA   |
| Isoform 4 of Hepatocyte growth factor                                        | HGF      | 100.0 | NA    | 2  | NA | 2  | NA | 2   | NA  | 6.8  | NA   |
| Isoform 2 of Insulin-like growth factor-binding protein 7                    | IGFBP7   | 100.0 | NA    | 2  | NA | 2  | NA | 3   | NA  | 9.3  | NA   |
| EPM2A-interacting protein 1                                                  | EPM2AIP1 | 100.0 | NA    | 2  |    | 2  |    | 3   | NA  | 4.0  | NA   |

|                                                                               |         |       |       |    |    |    |    |     |     |      |      |
|-------------------------------------------------------------------------------|---------|-------|-------|----|----|----|----|-----|-----|------|------|
|                                                                               |         |       |       |    | NA | NA |    |     |     |      |      |
| Carboxypeptidase N subunit 2                                                  | CPN2    | 100.0 | 100.0 | 10 | 10 | 16 | 16 | 41  | 45  | 21.1 | 21.1 |
| ER lumen protein retaining receptor 1                                         | KDELRL1 | 100.0 | NA    | 2  | NA | 2  | NA | 4   | NA  | 14.2 | NA   |
| Aspartate aminotransferase, mitochondrial                                     | GOT2    | 100.0 | NA    | 2  | NA | 2  | NA | 2   | NA  | 0.0  | NA   |
| FH2 domain-containing protein 1                                               | FHDC1   | 100.0 | NA    | 2  | NA | 2  | NA | 2   | NA  | 0.0  | NA   |
| Protein angel homolog 2                                                       | ANGEL2  | 100.0 | NA    | 2  | NA | 2  | NA | 2   | NA  | 5.0  | NA   |
| Complement C1r subcomponent-like protein                                      | C1RL    | 100.0 | 100.0 | 5  | 5  | 7  | 6  | 15  | 12  | 11.7 | 11.7 |
| Isoform 2 of L-selectin                                                       | SELL    | 100.0 | 100.0 | 4  | 5  | 5  | 6  | 7   | 8   | 9.1  | 13.5 |
| Coiled-coil domain-containing protein 85C                                     | CCDC85C | 99.9  | NA    | 2  | NA | 2  | NA | 2   | NA  | 6.9  | NA   |
| Echinoderm microtubule associated protein like 3, isoform CRA_e               | EML3    | 100.0 | NA    | 2  | NA | 2  | NA | 2   | NA  | 4.1  | NA   |
| Apolipoprotein A-IV                                                           | APOA4   | 100.0 | 100.0 | 32 | 32 | 55 | 55 | 350 | 310 | 67.7 | 67.7 |
| MAGUK p55 subfamily member 2                                                  | MPP2    | 100.0 | NA    | 2  | NA | 2  | NA | 2   | NA  | 6.2  | NA   |
| Isoform 2 of 1-phosphatidylinositol 4,5-bisphosphate phosphodiesterase beta-2 | PLCB2   | 100.0 | NA    | 2  | NA | 2  | NA | 2   | NA  | 0.0  | NA   |
| snRNA-activating protein complex subunit 4                                    | SNAPC4  | 100.0 | NA    | 2  | NA | 2  | NA | 2   | NA  | 0.0  | NA   |
| Mannan-binding lectin serine protease 2                                       | MASP2   | 100.0 | 100.0 | 5  | 4  | 7  | 6  | 10  | 8   | 9.2  | 7.7  |
| tRNA pseudouridine(38/39) synthase                                            | PUS3    | 100.0 | NA    | 2  | NA | 3  | NA | 4   | NA  | 7.9  | NA   |
| ELM2 and SANT domain-containing protein 1                                     | ELMSAN1 | 100.0 | 100.0 | 2  | 2  | 2  | 2  | 2   | 2   | 1.6  | 1.9  |

|                                                     |           |       |       |    |    |    |    |     |     |      |      |
|-----------------------------------------------------|-----------|-------|-------|----|----|----|----|-----|-----|------|------|
| Neuroblast differentiation-associated protein AHNAK | AHNAK     | 100.0 | 100.0 | 2  | 4  | 2  | 4  | 2   | 5   | 0.5  | 0.9  |
| Zinc finger homeobox protein 3                      | ZFH3      | 100.0 | 100.0 | 3  | 2  | 3  | 2  | 3   | 2   | 0.0  | 0.5  |
| Contactin-associated protein-like 2                 | CNTNAP2   | 100.0 | NA    | 2  | NA | 2  | NA | 6   | NA  | 0.0  | NA   |
| Protein DENND6A                                     | DENND6A   | 100.0 | NA    | 2  | NA | 2  | NA | 4   | NA  | 0.0  | NA   |
| Complement C2                                       | C2        | 100.0 | 100.0 | 6  | 7  | 10 | 12 | 39  | 35  | 39.5 | 43.0 |
| Glycocalicin                                        | GP1BA     | 100.0 | 100.0 | 5  | 6  | 5  | 7  | 11  | 9   | 8.1  | 10.1 |
| Keratin, type II cuticular Hb3                      | KRT83     | 100.0 | 100.0 | 9  | 10 | 10 | 12 | 14  | 18  | 17.6 | 17.8 |
| Alpha-2-HS-glycoprotein                             | AHSG      | 100.0 | 100.0 | 10 | 10 | 25 | 24 | 398 | 333 | 45.2 | 45.2 |
| Keratin, type II cytoskeletal 75                    | KRT75     | 100.0 | NA    | 2  | NA | 2  | NA | 2   | NA  | 14.9 | NA   |
| Desmoglein-1                                        | DSG1      | 100.0 | 100.0 | 3  | 2  | 3  | 2  | 3   | 2   | 3.7  | 2.8  |
| Neutrophil defensin 3                               | DEFA3     | 100.0 | 100.0 | 3  | 2  | 3  | 2  | 8   | 6   | 20.2 | 19.1 |
| U3 small nucleolar ribonucleoprotein protein MPP10  | MPHOSPH10 | 100.0 | NA    | 2  | NA | 2  | NA | 2   | NA  | 0.0  | NA   |
| Coagulation factor XII                              | F12       | 100.0 | 100.0 | 11 | 13 | 15 | 17 | 59  | 51  | 23.3 | 32.0 |
| Coagulation factor XIII B chain                     | F13B      | 100.0 | 100.0 | 19 | 20 | 30 | 32 | 65  | 59  | 41.1 | 42.8 |
| Serum albumin                                       | ALB       | 100.0 | 100.0 | 30 | 30 | 38 | 39 | 69  | 67  | 0.0  | 0.0  |
| Nebulin                                             | NEB       | 100.0 | 100.0 | 2  | 4  | 2  | 4  | 2   | 4   | 0.2  | 0.0  |
| MLL cleavage product C180                           | MLL       | 100.0 | NA    | 2  | NA | 2  | NA | 2   | NA  | 0.5  | NA   |
| Tetranectin                                         | CLEC3B    | 100.0 | 100.0 | 8  | 11 | 13 | 16 | 36  | 45  | 46.0 | 68.3 |
| Uncharacterized protein KIAA1671                    | KIAA1671  | 100.0 | NA    | 3  | NA | 3  | NA | 3   | NA  | 0.0  | NA   |
| Pumilio homolog 1 (Fragment)                        | PUM1      | 100.0 | NA    | 2  | NA | 2  | NA | 4   | NA  | 0.0  | NA   |
| Terminal uridylyltransferase 4                      | ZCCHC11   | 100.0 | 100.0 | 2  | 3  | 2  | 3  | 3   | 3   | 1.2  | 1.7  |
| Putative uncharacterized protein MLLT4-AS1          | MLLT4-AS1 | 100.0 | NA    | 2  | NA | 2  | NA | 3   | NA  | 0.0  | NA   |

|                                                                                  |         |       |       |   |    |    |    |     |     |      |      |
|----------------------------------------------------------------------------------|---------|-------|-------|---|----|----|----|-----|-----|------|------|
| Segment polarity protein dishevelled homolog DVL-1                               | DVL1    | 100.0 | NA    | 2 | NA | 2  | NA | 2   | NA  | 5.5  | NA   |
| Poly [ADP-ribose] polymerase 4                                                   | PARP4   | 100.0 | 100.0 | 2 | 2  | 2  | 2  | 5   | 3   | 1.1  | 1.1  |
| Vesicle-fusing ATPase                                                            | NSF     | 100.0 | NA    | 2 | NA | 2  | NA | 2   | NA  | 2.8  | NA   |
| Amyloid beta A4 precursor protein-binding family B member 1                      | APBB1   | 100.0 | NA    | 2 | NA | 2  | NA | 2   | NA  | 4.7  | NA   |
| Isoform 2 of Protein strawberry notch homolog 2                                  | SBNO2   | 100.0 | NA    | 2 | NA | 2  | NA | 2   | NA  | 1.6  | NA   |
| Nuclear receptor corepressor 1                                                   | NCOR1   | 100.0 | 100.0 | 2 | 2  | 2  | 2  | 3   | 2   | 0.7  | 0.0  |
| Coiled-coil alpha-helical rod protein 1                                          | CCHCR1  | 100.0 | NA    | 2 | NA | 2  | NA | 3   | NA  | 0.0  | NA   |
| Serine/threonine-protein kinase ULK2                                             | ULK2    | 100.0 | NA    | 2 | NA | 2  | NA | 2   | NA  | 2.0  | NA   |
| Cytoskeleton-associated protein 2                                                | CKAP2   | 100.0 | 100.0 | 2 | 2  | 2  | 2  | 3   | 3   | 4.6  | 4.3  |
| Adiponectin                                                                      | ADIPOQ  | 100.0 | 100.0 | 2 | 3  | 2  | 3  | 4   | 6   | 12.3 | 15.6 |
| Structural maintenance of chromosomes flexible hinge domain-containing protein 1 | SMCHD1  | 100.0 | NA    | 3 | NA | 3  | NA | 3   | NA  | 0.0  | NA   |
| Rab proteins geranylgeranyltransferase component A 2                             | CHML    | 100.0 | NA    | 2 | NA | 2  | NA | 2   | NA  | 2.9  | NA   |
| 14-3-3 protein zeta/delta (Fragment)                                             | YWHAZ   | 100.0 | 100.0 | 5 | 5  | 6  | 5  | 9   | 6   | 21.5 | 23.7 |
| Oxysterol-binding protein-related protein 1                                      | OSBPL1A | 100.0 | 100.0 | 4 | 3  | 4  | 3  | 5   | 5   | 0.0  | 0.0  |
| Isoform 3 of FCH and double SH3 domains protein 1                                | FCHSD1  | 100.0 | NA    | 2 | NA | 2  | NA | 2   | NA  | 3.9  | NA   |
| Isoform 2 of C4b-binding protein beta chain                                      | C4BPB   | 100.0 | 100.0 | 4 | 4  | 5  | 5  | 8   | 8   | 21.1 | 21.9 |
| Alpha-1-acid glycoprotein 2                                                      | ORM2    | 100.0 | 100.0 | 7 | 7  | 19 | 18 | 117 | 111 | 46.8 | 54.7 |
| Isoform 5 of SH3 domain-containing protein 21                                    | SH3D21  | 100.0 | NA    | 2 | NA | 2  | NA | 2   | NA  | 4.1  | NA   |

|                                                                                 |          |       |       |    |    |    |    |     |     |      |      |
|---------------------------------------------------------------------------------|----------|-------|-------|----|----|----|----|-----|-----|------|------|
| DNA polymerase epsilon catalytic subunit A                                      | POLE     | 100.0 | NA    | 2  | NA | 2  | NA | 2   | NA  | 1.4  | NA   |
| FERM domain-containing protein 4B                                               | FRMD4B   | 100.0 | 100.0 | 2  | 3  | 2  | 3  | 2   | 3   | 0.0  | 0.0  |
| RING finger protein 112                                                         | RNF112   | 100.0 | NA    | 2  | NA | 2  | NA | 2   | NA  | 0.0  | NA   |
| Isoform 2 of Keratin, type I cuticular Ha6                                      | KRT36    | 100.0 | NA    | 2  | NA | 2  | NA | 6   | NA  | 6.0  | NA   |
| Isoform BMAL1A of Aryl hydrocarbon receptor nuclear translocator-like protein 1 | ARNTL    | 100.0 | NA    | 2  | NA | 2  | NA | 2   | NA  | 0.0  | NA   |
| Alpha-1-antitrypsin                                                             | SERPINA1 | 100.0 | 100.0 | 10 | 10 | 13 | 12 | 37  | 35  | 29.2 | 28.7 |
| Alpha-1-antichymotrypsin                                                        | SERPINA3 | 100.0 | 100.0 | 18 | 19 | 37 | 37 | 517 | 536 | 38.2 | 40.2 |
| Neurofilament light polypeptide                                                 | NEFL     | 99.9  | NA    | 2  | NA | 2  | NA | 2   | NA  | 4.1  | NA   |
| Ankyrin and armadillo repeat-containing protein                                 | ANKAR    | 100.0 | NA    | 2  | NA | 2  | NA | 2   | NA  | 2.1  | NA   |
| 1-phosphatidylinositol 4,5-bisphosphate phosphodiesterase gamma-2               | PLCG2    | 100.0 | NA    | 2  | NA | 2  | NA | 2   | NA  | 2.8  | NA   |
| Centrosomal protein of 290 kDa                                                  | CEP290   | 100.0 | 100.0 | 3  | 6  | 3  | 6  | 4   | 9   | 1.5  | 2.4  |
| Protein unc-13 homolog B                                                        | UNC13B   | 100.0 | NA    | 2  | NA | 2  | NA | 2   | NA  | 1.6  | NA   |
| Carnitine O-palmitoyltransferase 1, liver isoform                               | CPT1A    | 100.0 | NA    | 2  | NA | 2  | NA | 3   | NA  | 3.4  | NA   |
| Low-density lipoprotein receptor-related protein 2                              | LRP2     | 100.0 | NA    | 3  | NA | 3  | NA | 3   | NA  | 0.0  | NA   |
| Translation initiation factor eIF-2B subunit delta                              | EIF2B4   | 100.0 | 99.9  | 2  | 2  | 2  | 2  | 2   | 2   | 4.2  | 6.3  |
| Leucine-rich alpha-2-glycoprotein                                               | LRG1     | 100.0 | 100.0 | 8  | 10 | 14 | 15 | 82  | 81  | 31.1 | 39.5 |
| Isoform G of Protein SON                                                        | SON      | 100.0 | 100.0 | 3  | 3  | 3  | 3  | 3   | 3   | 0.0  | 1.1  |
| E3 ubiquitin-protein ligase BRE1A                                               | RNF20    | 100.0 | NA    | 2  | NA | 2  | NA | 2   | NA  | 2.5  | NA   |

|                                                           |         |       |       |    |    |    |    |     |     |      |      |
|-----------------------------------------------------------|---------|-------|-------|----|----|----|----|-----|-----|------|------|
| Dynein heavy chain 2, axonemal                            | DNAH2   | 100.0 | 100.0 | 3  | 4  | 3  | 4  | 3   | 4   | 1.0  | 1.0  |
| Serum paraoxonase/arylesterase 1                          | PON1    | 100.0 | 100.0 | 10 | 11 | 28 | 28 | 139 | 147 | 49.9 | 55.2 |
| Protein PRRC2B                                            | PRRC2B  | 100.0 | 100.0 | 2  | 3  | 2  | 3  | 2   | 3   | 0.0  | 0.0  |
| Heat shock 70 kDa protein 4                               | HSPA4   | 100.0 | NA    | 2  | NA | 3  | NA | 13  | NA  | 0.0  | NA   |
| Phosphate-regulating neutral endopeptidase                | PHEX    | 100.0 | NA    | 2  | NA | 2  | NA | 2   | NA  | 2.9  | NA   |
| Laminin subunit alpha-2                                   | LAMA2   | 100.0 | 100.0 | 2  | 3  | 2  | 3  | 2   | 4   | 0.0  | 0.0  |
| Isoform 2 of La-related protein 1                         | LARP1   | 100.0 | NA    | 2  | NA | 2  | NA | 2   | NA  | 1.6  | NA   |
| Protein NPAT                                              | NPAT    | 100.0 | NA    | 3  | NA | 3  | NA | 4   | NA  | 0.0  | NA   |
| RNA-binding motif protein, X-linked-like-3                | RBMXL3  | 100.0 | 100.0 | 2  | 2  | 2  | 2  | 2   | 2   | 0.0  | 2.8  |
| Isoform 2 of SUN domain-containing ossification factor    | SUCO    | 100.0 | NA    | 2  | NA | 3  | NA | 7   | NA  | 0.0  | NA   |
| Oxysterol-binding protein-related protein 11              | OSBPL11 | 100.0 | NA    | 2  | NA | 2  | NA | 19  | NA  | 4.3  | NA   |
| Isoform 3 of Histone-lysine N-methyltransferase MLL2      | MLL2    | 100.0 | 100.0 | 2  | 2  | 2  | 2  | 2   | 2   | 0.0  | 0.0  |
| Platelet basic protein                                    | PPBP    | 100.0 | 100.0 | 8  | 8  | 14 | 13 | 70  | 75  | 51.6 | 51.6 |
| Protein SOGA2                                             | SOGA2   | 100.0 | 100.0 | 3  | 3  | 3  | 3  | 3   | 5   | 0.0  | 0.0  |
| Isoform 2 of Nucleolar protein 16                         | NOP16   | 100.0 | NA    | 2  | NA | 2  | NA | 2   | NA  | 9.8  | NA   |
| Insulin-degrading enzyme                                  | IDE     | 100.0 | 100.0 | 2  | 2  | 2  | 2  | 2   | 2   | 2.2  | 0.0  |
| Isoform 5 of Cysteine-rich with EGF-like domain protein 2 | CRELD2  | 100.0 | NA    | 2  | NA | 2  | NA | 5   | NA  | 0.0  | NA   |
| Bromodomain-containing protein 9                          | BRD9    | 99.9  | NA    | 2  | NA | 2  | NA | 4   | NA  | 0.0  | NA   |
| Alpha-enolase                                             | ENO1    | 100.0 | NA    | 2  | NA | 2  | NA | 2   | NA  | 6.5  | NA   |



|                                                                         |         |       |       |   |    |   |    |    |    |      |      |
|-------------------------------------------------------------------------|---------|-------|-------|---|----|---|----|----|----|------|------|
| Isoform 2 of MAP7 domain-containing protein 3                           | MAP7D3  | 100.0 | NA    | 2 | NA | 2 | NA | 2  | NA | 3.1  | NA   |
| Pregnancy zone protein                                                  | PZP     | 100.0 | 100.0 | 8 | 8  | 9 | 8  | 12 | 11 | 13.3 | 13.6 |
| von Willebrand factor A domain-containing protein 8                     | VWA8    | 100.0 | NA    | 2 | NA | 2 | NA | 2  | NA | 0.0  | NA   |
| Protocadherin-15                                                        | PCDH15  | 100.0 | NA    | 2 | NA | 2 | NA | 2  | NA | 1.2  | NA   |
| C-type lectin domain family 11 member A                                 | CLEC11A | 100.0 | NA    | 2 | NA | 2 | NA | 3  | NA | 5.1  | NA   |
| Isoform 2 of Centrosomal protein of 170 kDa protein B                   | CEP170B | 100.0 | NA    | 2 | NA | 2 | NA | 2  | NA | 1.9  | NA   |
| Isoform 10 of Voltage-dependent T-type calcium channel subunit alpha-1G | CACNA1G | 100.0 | 100.0 | 2 | 2  | 3 | 2  | 14 | 2  | 0.0  | 1.3  |
| Zinc finger protein 770                                                 | ZNF770  | 100.0 | NA    | 2 | NA | 2 | NA | 2  | NA | 4.2  | NA   |
| Isoform 2 of Treslin                                                    | TICRR   | 100.0 | 100.0 | 3 | 2  | 3 | 2  | 3  | 3  | 1.5  | 1.0  |
| AT-rich interactive domain-containing protein 3B                        | ARID3B  | 100.0 | NA    | 2 | NA | 2 | NA | 2  | NA | 0.0  | NA   |
| Kinectin                                                                | KTN1    | 100.0 | 100.0 | 2 | 2  | 2 | 2  | 2  | 3  | 2.0  | 0.0  |
| Isoform 7 of cAMP-specific 3',5'-cyclic phosphodiesterase 4D            | PDE4D   | 100.0 | NA    | 2 | NA | 2 | NA | 2  | NA | 3.1  | NA   |
| Centromere protein F                                                    | CENPF   | 100.0 | NA    | 3 | NA | 3 | NA | 4  | NA | 0.0  | NA   |
| Alpha-N-acetylglucosaminidase                                           | NAGLU   | 100.0 | 100.0 | 2 | 3  | 3 | 3  | 4  | 4  | 5.1  | 7.1  |
| Kinesin light chain 1                                                   | KLC1    | 100.0 | NA    | 2 | NA | 2 | NA | 2  | NA | 0.0  | NA   |
| Unconventional myosin-XVI                                               | MYO16   | 100.0 | NA    | 2 | NA | 2 | NA | 2  | NA | 0.0  | NA   |
| Glyoxalase domain-containing protein 4                                  | GLOD4   | 100.0 | NA    | 2 | NA | 2 | NA | 2  | NA | 0.0  | NA   |

|                                                                        |          |       |       |    |    |    |    |    |    |      |      |
|------------------------------------------------------------------------|----------|-------|-------|----|----|----|----|----|----|------|------|
| Isoform 2 of Zinc finger CCCH domain-containing protein 13             | ZC3H13   | 100.0 | 100.0 | 2  | 2  | 2  | 2  | 5  | 4  | 0.0  | 0.0  |
| Tankyrase-2                                                            | TNKS2    | 100.0 | NA    | 4  | NA | 4  | NA | 4  | NA | 6.3  | NA   |
| NEDD4-like E3 ubiquitin-protein ligase WWP2                            | WWP2     | 100.0 | NA    | 3  | NA | 3  | NA | 3  | NA | 4.4  | NA   |
| Tissue alpha-L-fucosidase                                              | FUCA1    | 100.0 | 100.0 | 2  | 2  | 3  | 3  | 3  | 3  | 4.7  | 4.7  |
| ATP-binding cassette sub-family A member 3                             | ABCA3    | 100.0 | NA    | 2  | NA | 3  | NA | 4  | NA | 0.0  | NA   |
| Isoform 2 of Voltage-dependent T-type calcium channel subunit alpha-1H | CACNA1H  | 100.0 | 100.0 | 2  | 2  | 2  | 2  | 2  | 2  | 0.0  | 0.0  |
| Inactive dual specificity phosphatase 27                               | DUSP27   | 100.0 | NA    | 3  | NA | 3  | NA | 3  | NA | 0.0  | NA   |
| Sulfhydryl oxidase 1                                                   | QSOX1    | 100.0 | 100.0 | 8  | 9  | 9  | 10 | 13 | 18 | 13.3 | 17.7 |
| Isoform 3 of Xaa-Pro dipeptidase                                       | PEPD     | 100.0 | 100.0 | 2  | 3  | 2  | 3  | 2  | 3  | 4.2  | 5.3  |
| Isoform 3 of Ryanodine receptor 1                                      | RYR1     | 100.0 | NA    | 2  | NA | 2  | NA | 2  | NA | 0.0  | NA   |
| Isoform 3 of Golgin subfamily A member 4                               | GOLGA4   | 100.0 | NA    | 2  | NA | 2  | NA | 2  | NA | 0.0  | NA   |
| CD44 antigen (Fragment)                                                | CD44     | 100.0 | 100.0 | 2  | 2  | 2  | 2  | 6  | 5  | 8.8  | 8.4  |
| Isoform F of Proteoglycan 4                                            | PRG4     | 100.0 | 100.0 | 13 | 13 | 15 | 14 | 20 | 21 | 9.9  | 10.0 |
| Isoform 2 of ATP-binding cassette sub-family G member 1                | ABCG1    | 100.0 | NA    | 3  | NA | 3  | NA | 3  | NA | 0.0  | NA   |
| Isoform 2 of Plasminogen activator inhibitor 1                         | SERPINE1 | 100.0 | NA    | 2  | NA | 2  | NA | 2  | NA | 4.9  | NA   |
| Tolloid-like protein 2                                                 | TLL2     | 100.0 | NA    | 3  | NA | 3  | NA | 4  | NA | 3.9  | NA   |
| Isoform 2 of E3 ubiquitin-protein ligase NEDD4                         | NEDD4    | 100.0 | 100.0 | 2  | 2  | 2  | 2  | 2  | 3  | 0.0  | 0.0  |
| Hemoglobin subunit alpha                                               | HBA1     | 100.0 | 100.0 | 2  | 4  | 4  | 8  | 7  | 14 | 16.9 | 48.6 |

|                                                                           |          |       |       |    |    |    |    |     |     |      |      |
|---------------------------------------------------------------------------|----------|-------|-------|----|----|----|----|-----|-----|------|------|
| Vacuolar protein sorting-associated protein 18 homolog                    | VPS18    | 100.0 | NA    | 2  | NA | 2  | NA | 2   | NA  | 2.2  | NA   |
| WASH complex subunit 7                                                    | KIAA1033 | 100.0 | NA    | 2  | NA | 2  | NA | 2   | NA  | 0.0  | NA   |
| Isoform 2 of Signal peptide, CUB and EGF-like domain-containing protein 2 | SCUBE2   | 100.0 | 100.0 | 2  | 2  | 2  | 2  | 3   | 3   | 0.0  | 0.0  |
| Probable JmjC domain-containing histone demethylation protein 2C          | JMJD1C   | 100.0 | 100.0 | 3  | 2  | 3  | 2  | 4   | 2   | 1.5  | 0.0  |
| Conserved oligomeric Golgi complex subunit 7                              | COG7     | 100.0 | NA    | 2  | NA | 2  | NA | 2   | NA  | 3.3  | NA   |
| Isoform 6 of Plectin                                                      | PLEC     | 100.0 | 100.0 | 4  | 4  | 4  | 4  | 6   | 4   | 0.8  | 0.9  |
| Isoform 2 of PAS domain-containing serine/threonine-protein kinase        | PASK     | 100.0 | NA    | 2  | NA | 3  | NA | 10  | NA  | 2.0  | NA   |
| Complement C1q subcomponent subunit C                                     | C1QC     | 100.0 | 100.0 | 5  | 5  | 7  | 6  | 25  | 22  | 25.3 | 25.3 |
| Erythroid transcription factor                                            | GATA1    | 100.0 | NA    | 2  | NA | 2  | NA | 2   | NA  | 8.1  | NA   |
| Isoform 2 of DNA-dependent protein kinase catalytic subunit               | PRKDC    | 100.0 | 100.0 | 5  | 4  | 5  | 4  | 5   | 8   | 0.0  | 0.0  |
| ATP-binding cassette sub-family A member 2                                | ABCA2    | 100.0 | NA    | 2  | NA | 2  | NA | 2   | NA  | 1.3  | NA   |
| Keratin, type II cytoskeletal 1                                           | KRT1     | 100.0 | 100.0 | 31 | 31 | 56 | 55 | 234 | 230 | 0.0  | 0.0  |
| Carbonic anhydrase 1                                                      | CA1      | 100.0 | 100.0 | 10 | 9  | 15 | 13 | 51  | 47  | 52.9 | 46.0 |
| Desmoglein-2                                                              | DSG2     | 100.0 | 100.0 | 3  | 3  | 3  | 3  | 4   | 3   | 3.9  | 3.5  |
| Ubiquitin (Fragment)                                                      | RPS27A   | 100.0 | NA    | 3  | NA | 4  | NA | 6   | NA  | 32.1 | NA   |
| IgGFc-binding protein                                                     | FCGBP    | 100.0 | 100.0 | 12 | 12 | 13 | 13 | 17  | 18  | 3.1  | 3.2  |
| Laminin subunit beta-1                                                    | LAMB1    | 100.0 | 100.0 | 2  | 2  | 2  | 2  | 6   | 2   | 0.0  | 1.6  |
| DNA repair endonuclease XPF                                               | ERCC4    | 100.0 | NA    | 2  | NA | 2  | NA | 2   | NA  | 2.2  | NA   |
| Isoform 2 of Teneurin-1                                                   | TENM1    | 100.0 | NA    | 2  |    | 2  |    | 4   | NA  | 0.0  | NA   |

|                                                                                               |          |       |       |   |    |   |    |    |     |      |      |
|-----------------------------------------------------------------------------------------------|----------|-------|-------|---|----|---|----|----|-----|------|------|
| Mucin-5B                                                                                      | MUC5B    | 100.0 | 100.0 | 3 | NA | 3 | NA | 3  | 2   | 0.6  | 0.8  |
| Soluble scavenger receptor cysteine-rich domain-containing protein SSC5D                      | SSC5D    | 100.0 | 100.0 | 2 | 2  | 2 | 2  | 3  | 2   | 1.8  | 1.8  |
| FYVE and coiled-coil domain-containing protein 1                                              | FYCO1    | 100.0 | NA    | 2 | NA | 2 | NA | 3  | NA  | 0.0  | NA   |
| Isoform 2 of Immunoglobulin superfamily member 1                                              | IGSF1    | 100.0 | NA    | 2 | NA | 2 | NA | 2  | NA  | 0.0  | NA   |
| Leucine-rich repeat, immunoglobulin-like domain and transmembrane domain-containing protein 1 | LRIT1    | 100.0 | 100.0 | 2 | 2  | 2 | 3  | 2  | 4   | 0.0  | 0.0  |
| Isoform LMW of Kininogen-1                                                                    | KNG1     | 100.0 | 100.0 | 3 | 26 | 4 | 49 | 28 | 289 | 54.1 | 54.1 |
| Coronin-1A                                                                                    | CORO1A   | 100.0 | 100.0 | 2 | 2  | 2 | 2  | 2  | 2   | 5.6  | 5.6  |
| Centromere-associated protein E                                                               | CENPE    | 100.0 | NA    | 3 | NA | 3 | NA | 3  | NA  | 1.3  | NA   |
| Pygopus homolog 1                                                                             | PYGO1    | 100.0 | NA    | 2 | NA | 2 | NA | 2  | NA  | 3.3  | NA   |
| Phosphatidylcholine-sterol acyltransferase                                                    | LCAT     | 100.0 | 100.0 | 5 | 6  | 6 | 8  | 6  | 9   | 19.8 | 23.0 |
| Glutamine-rich protein 2                                                                      | QRICH2   | 100.0 | 100.0 | 2 | 3  | 2 | 3  | 2  | 3   | 1.3  | 0.0  |
| Neurolysin, mitochondrial                                                                     | NLN      | 100.0 | NA    | 3 | NA | 3 | NA | 5  | NA  | 4.8  | NA   |
| Isoform 2 of Gamma-2-syntrophin                                                               | SNTG2    | 100.0 | NA    | 2 | NA | 2 | NA | 2  | NA  | 7.0  | NA   |
| Platelet factor 4                                                                             | PF4      | 100.0 | 100.0 | 4 | 4  | 9 | 9  | 40 | 35  | 35.6 | 35.6 |
| Transmembrane protein 132C                                                                    | TMEM132C | 100.0 | NA    | 2 | NA | 2 | NA | 2  | NA  | 5.2  | NA   |
| Isoform 2 of Collagen alpha-1(VII) chain                                                      | COL7A1   | 100.0 | 100.0 | 2 | 2  | 2 | 2  | 2  | 2   | 0.0  | 1.0  |
| SPARC                                                                                         | SPARC    | 100.0 | 100.0 | 3 | 4  | 3 | 4  | 5  | 5   | 11.6 | 15.5 |
| Microtubule-associated protein                                                                | MAP4     | 100.0 | 100.0 | 2 | 2  | 2 | 2  | 7  | 5   | 2.5  | 2.5  |

|                                                                     |         |       |       |    |    |    |    |     |     |      |      |
|---------------------------------------------------------------------|---------|-------|-------|----|----|----|----|-----|-----|------|------|
| Isoform 4 of Histone-lysine N-methyltransferase NSD3                | WHSC1L1 | 100.0 | NA    | 2  | NA | 2  | NA | 2   | NA  | 0.0  | NA   |
| Beta-2-glycoprotein 1                                               | APOH    | 100.0 | 100.0 | 17 | 17 | 29 | 30 | 212 | 220 | 58.0 | 58.0 |
| Protein FAM179A                                                     | FAM179A | 100.0 | NA    | 2  | NA | 2  | NA | 2   | NA  | 3.0  | NA   |
| Isoform 2 of Protein strawberry notch homolog 1                     | SBNO1   | 100.0 | 99.9  | 2  | 2  | 2  | 2  | 2   | 2   | 2.7  | 2.7  |
| Vinculin                                                            | VCL     | 100.0 | 100.0 | 3  | 5  | 3  | 5  | 3   | 5   | 4.3  | 5.2  |
| Platelet-derived growth factor receptor alpha                       | PDGFRA  | 100.0 | NA    | 2  | NA | 2  | NA | 2   | NA  | 2.6  | NA   |
| Interferon-induced, double-stranded RNA-activated protein kinase    | EIF2AK2 | 100.0 | 100.0 | 2  | 2  | 3  | 2  | 3   | 4   | 0.0  | 0.0  |
| Tensin-1                                                            | TNS1    | 100.0 | NA    | 2  | NA | 2  | NA | 2   | NA  | 0.0  | NA   |
| 1-phosphatidylinositol 4,5-bisphosphate phosphodiesterase epsilon-1 | PLCE1   | 100.0 | 100.0 | 3  | 3  | 4  | 3  | 7   | 8   | 0.0  | 2.0  |
| Isoform 2 of Protein dopey-2                                        | DOPEY2  | 100.0 | NA    | 2  | NA | 2  | NA | 9   | NA  | 0.0  | NA   |
| Transaldolase                                                       | TALDO1  | 100.0 | 100.0 | 3  | 2  | 3  | 2  | 3   | 2   | 8.6  | 6.2  |
| Golgin subfamily A member 1                                         | GOLGA1  | 100.0 | NA    | 2  | NA | 2  | NA | 2   | NA  | 0.0  | NA   |
| HEAT repeat-containing protein 5A                                   | HEATR5A | 100.0 | NA    | 2  | NA | 2  | NA | 2   | NA  | 0.9  | NA   |
| N-alpha-acetyltransferase 35, NatC auxiliary subunit                | NAA35   | 100.0 | NA    | 2  | NA | 2  | NA | 2   | NA  | 0.0  | NA   |
| Transcription factor COE1                                           | EBF1    | 99.9  | NA    | 2  | NA | 2  | NA | 2   | NA  | 0.0  | NA   |
| DNA mismatch repair protein Msh3                                    | MSH3    | 100.0 | 100.0 | 3  | 3  | 3  | 3  | 4   | 7   | 4.7  | 4.7  |
| Histone-lysine N-methyltransferase                                  | SETMAR  | 100.0 | NA    | 2  | NA | 2  | NA | 2   | NA  | 0.0  | NA   |

|                                                           |          |       |       |    |    |    |    |      |      |      |      |
|-----------------------------------------------------------|----------|-------|-------|----|----|----|----|------|------|------|------|
| Regulating synaptic membrane exocytosis protein 1         | RIMS1    | 100.0 | NA    | 3  | NA | 3  | NA | 3    | NA   | 0.0  | NA   |
| Isoform 2 of CDK5 regulatory subunit-associated protein 2 | CDK5RAP2 | 100.0 | 100.0 | 2  | 2  | 3  | 2  | 3    | 2    | 1.5  | 2.1  |
| Zinc finger protein 800                                   | ZNF800   | 100.0 | NA    | 2  | NA | 2  | NA | 2    | NA   | 2.3  | NA   |
| Isoform 4 of Serine/threonine-protein kinase 40           | STK40    | 100.0 | 100.0 | 2  | 2  | 2  | 2  | 3    | 2    | 7.7  | 7.7  |
| Protein TANC2                                             | TANC2    | 100.0 | NA    | 2  | NA | 2  | NA | 2    | NA   | 1.0  | NA   |
| Zinc finger protein with KRAB and SCAN domains 3          | ZKSCAN3  | 100.0 | NA    | 2  | NA | 2  | NA | 2    | NA   | 3.9  | NA   |
| Hepatocyte growth factor activator                        | HGFAC    | 100.0 | 100.0 | 11 | 11 | 13 | 13 | 23   | 23   | 17.6 | 19.6 |
| Apolipoprotein A-I                                        | APOA1    | 100.0 | 100.0 | 33 | 33 | 78 | 78 | 1116 | 1038 | 75.7 | 76.4 |
| Complement component C9                                   | C9       | 100.0 | 100.0 | 19 | 21 | 30 | 36 | 118  | 129  | 41.3 | 41.9 |
| Bromodomain and WD repeat-containing protein 1            | BRWD1    | 100.0 | NA    | 2  | NA | 2  | NA | 2    | NA   | 0.8  | NA   |
| Hemicentin-2                                              | HMCN2    | 100.0 | 100.0 | 2  | 3  | 2  | 3  | 2    | 3    | 0.4  | 0.0  |
| Alpha-2-antiplasmin                                       | SERPINF2 | 100.0 | 100.0 | 16 | 18 | 26 | 27 | 132  | 124  | 41.1 | 49.5 |
| Putative uncharacterized protein CXorf49                  | CXorf49  | 100.0 | 100.0 | 2  | 2  | 3  | 2  | 3    | 4    | 7.8  | 7.8  |
| Uncharacterized protein KIAA1551                          | KIAA1551 | 100.0 | 100.0 | 4  | 2  | 4  | 2  | 4    | 3    | 0.0  | 0.0  |
| Isoform 4 of FH1/FH2 domain-containing protein 3          | FHOD3    | 100.0 | NA    | 2  | NA | 2  | NA | 2    | NA   | 1.2  | NA   |
| Nebulette                                                 | NEBL     | 100.0 | 100.0 | 2  | 2  | 2  | 2  | 2    | 2    | 0.0  | 1.6  |
| NFX1-type zinc finger-containing protein 1                | ZNFX1    | 100.0 | 100.0 | 2  | 2  | 2  | 2  | 3    | 2    | 1.8  | 0.0  |
| RasGAP-activating-like protein 1                          | RASAL1   | 99.9  | NA    | 2  | NA | 2  | NA | 2    | NA   | 3.6  | NA   |
| Lysine-specific demethylase 7                             | JHDM1D   | 100.0 | NA    | 2  | NA | 2  | NA | 9    | NA   | 0.0  | NA   |

|                                                                      |          |       |       |    |    |    |    |     |     |      |      |
|----------------------------------------------------------------------|----------|-------|-------|----|----|----|----|-----|-----|------|------|
| Transformer-2 protein homolog alpha                                  | TRA2A    | 100.0 | NA    | 2  | NA | 2  | NA | 2   | NA  | 10.3 | NA   |
| Glucoside xylosyltransferase 2                                       | GXYLT2   | 100.0 | NA    | 2  | NA | 2  | NA | 2   | NA  | 9.0  | NA   |
| DENN domain-containing protein 3                                     | DENND3   | 100.0 | 100.0 | 2  | 2  | 2  | 2  | 5   | 4   | 0.0  | 0.0  |
| Dynein heavy chain 6, axonemal                                       | DNAH6    | 100.0 | 100.0 | 2  | 2  | 2  | 2  | 4   | 2   | 0.0  | 0.0  |
| WD repeat-containing protein 60                                      | WDR60    | 100.0 | NA    | 2  | NA | 2  | NA | 2   | NA  | 0.0  | NA   |
| Protein FAM13A                                                       | FAM13A   | 100.0 | 100.0 | 2  | 2  | 2  | 2  | 2   | 2   | 2.3  | 0.0  |
| Prothrombin                                                          | F2       | 100.0 | 100.0 | 28 | 28 | 55 | 52 | 270 | 255 | 53.5 | 53.5 |
| Isoform 3 of E3 ubiquitin-protein ligase TRIP12                      | TRIP12   | 100.0 | NA    | 2  | NA | 2  | NA | 3   | NA  | 0.9  | NA   |
| Isoform B of GC-rich sequence DNA-binding factor 1                   | GCFC1    | 100.0 | NA    | 2  | NA | 2  | NA | 2   | NA  | 0.0  | NA   |
| Lysozyme C                                                           | LYZ      | 100.0 | 100.0 | 4  | 4  | 4  | 6  | 23  | 25  | 38.5 | 38.5 |
| Codanin-1                                                            | CDAN1    | 100.0 | NA    | 2  | NA | 2  | NA | 3   | NA  | 0.0  | NA   |
| Protein piccolo                                                      | PCLO     | 100.0 | 100.0 | 3  | 2  | 3  | 2  | 6   | 2   | 0.0  | 0.0  |
| Ankyrin repeat domain-containing protein 34A                         | ANKRD34A | 100.0 | NA    | 2  | NA | 2  | NA | 2   | NA  | 0.0  | NA   |
| AT-rich interactive domain-containing protein 3A                     | ARID3A   | 99.9  | NA    | 2  | NA | 2  | NA | 5   | NA  | 0.0  | NA   |
| TPR repeat-containing big gene cloned at Keio                        | TPRBK    | 100.0 | NA    | 3  | NA | 3  | NA | 3   | NA  | 0.0  | NA   |
| Isoform 3 of Pleckstrin homology domain-containing family G member 2 | PLEKHG2  | 100.0 | NA    | 2  | NA | 2  | NA | 2   | NA  | 0.0  | NA   |
| Polyadenylate-binding protein 2                                      | PABPN1   | 100.0 | NA    | 2  | NA | 2  | NA | 2   | NA  | 9.2  | NA   |
| Synaptonemal complex protein 2                                       | SYCP2    | 100.0 | NA    | 2  | NA | 2  | NA | 2   | NA  | 0.0  | NA   |
| Integrin alpha-8                                                     | ITGA8    | 100.0 | NA    | 2  | NA | 2  | NA | 2   | NA  | 1.7  | NA   |

|                                                                            |          |       |       |    |    |    |    |    |    |     |      |
|----------------------------------------------------------------------------|----------|-------|-------|----|----|----|----|----|----|-----|------|
| Lysine-specific demethylase 3A                                             | KDM3A    | 100.0 | 100.0 | 2  | 2  | 2  | 3  | 7  | 4  | 1.3 | 1.3  |
| Laminin subunit alpha-1                                                    | LAMA1    | 100.0 | NA    | 2  | NA | 2  | NA | 2  | NA | 0.9 | NA   |
| C-Maf-inducing protein                                                     | CMIP     | 100.0 | 100.0 | 2  | 2  | 3  | 3  | 8  | 7  | 0.0 | 0.0  |
| Serine/threonine-protein phosphatase 6 regulatory ankyrin repeat subunit B | ANKRD44  | NA    | 100.0 | NA | 2  | NA | 2  | NA | 2  | NA  | 0.0  |
| Stabilin-1                                                                 | STAB1    | NA    | 100.0 | NA | 2  | NA | 2  | NA | 3  | NA  | 1.3  |
| Isoform 2 of Regulation of nuclear pre-mRNA domain-containing protein 2    | RPRD2    | NA    | 100.0 | NA | 2  | NA | 2  | NA | 4  | NA  | 0.0  |
| Endonuclease ZRANB3                                                        | ZRANB3   | NA    | 100.0 | NA | 2  | NA | 2  | NA | 5  | NA  | 2.6  |
| Rho-related BTB domain-containing protein 1                                | RHOBTB1  | NA    | 100.0 | NA | 2  | NA | 2  | NA | 4  | NA  | 4.9  |
| Mucin-2                                                                    | MUC2     | NA    | 100.0 | NA | 2  | NA | 2  | NA | 2  | NA  | 0.0  |
| Tetratricopeptide repeat protein 16                                        | TTC16    | NA    | 100.0 | NA | 2  | NA | 2  | NA | 2  | NA  | 2.4  |
| Isoform 4 of E3 ubiquitin-protein ligase UBR2                              | UBR2     | NA    | 100.0 | NA | 2  | NA | 2  | NA | 2  | NA  | 1.1  |
| Isoform 2 of RING finger protein 145                                       | RNF145   | NA    | 100.0 | NA | 2  | NA | 2  | NA | 2  | NA  | 4.2  |
| ADAMTS-like protein 3                                                      | ADAMTSL3 | NA    | 100.0 | NA | 2  | NA | 2  | NA | 2  | NA  | 0.0  |
| Isoform 2 of Testis-specific chromodomain protein Y 1                      | CDY1     | NA    | 100.0 | NA | 2  | NA | 2  | NA | 2  | NA  | 4.3  |
| Isoform 2 of Trinucleotide repeat-containing gene 6B protein               | TNRC6B   | NA    | 100.0 | NA | 2  | NA | 2  | NA | 2  | NA  | 1.7  |
| Zymogen granule protein 16 homolog B                                       | ZG16B    | NA    | 100.0 | NA | 3  | NA | 3  | NA | 3  | NA  | 12.0 |
| Inhibin beta C chain                                                       | INHBC    | NA    | 100.0 | NA | 2  | NA | 2  | NA | 2  | NA  | 5.4  |
| Adenylate cyclase type 7                                                   | ADCY7    | NA    | 100.0 | NA | 2  | NA | 2  | NA | 2  | NA  | 0.0  |
| Telomerase protein component 1                                             | TEP1     | NA    | 100.0 | NA | 2  | NA | 2  | NA | 2  | NA  | 1.0  |
| Multiple inositol polyphosphate phosphatase 1                              | MINPP1   | NA    | 100.0 | NA | 2  | NA | 2  | NA | 2  | NA  | 4.7  |
| Isoform 2 of Asparagine synthetase [glutamine-hydrolyzing]                 | ASNS     | NA    | 100.0 | NA | 2  | NA | 2  | NA | 2  | NA  | 4.1  |



|                                                                            |           |    |       |    |   |    |   |    |   |    |      |
|----------------------------------------------------------------------------|-----------|----|-------|----|---|----|---|----|---|----|------|
| Protein RIC-3                                                              | RIC3      | NA | 100.0 | NA | 2 | NA | 2 | NA | 2 | NA | 5.7  |
| E3 ubiquitin-protein ligase NEURL3                                         | NEURL3    | NA | 100.0 | NA | 2 | NA | 2 | NA | 2 | NA | 11.1 |
| WD repeat and FYVE domain-containing protein 3                             | WDFY3     | NA | 100.0 | NA | 2 | NA | 2 | NA | 4 | NA | 0.6  |
| Isoform 2 of Ubiquitin carboxyl-terminal hydrolase 43                      | USP43     | NA | 99.9  | NA | 2 | NA | 2 | NA | 2 | NA | 5.0  |
| Putative RNA-binding protein Luc7-like 2                                   | LUC7L2    | NA | 100.0 | NA | 2 | NA | 2 | NA | 2 | NA | 11.0 |
| RAB3GAP1 protein                                                           | RAB3GAP1  | NA | 100.0 | NA | 2 | NA | 2 | NA | 2 | NA | 2.3  |
| Protein LOC388210 (Fragment)                                               | LOC388210 | NA | 100.0 | NA | 3 | NA | 3 | NA | 3 | NA | 2.1  |
| Carbonic anhydrase 2                                                       | CA2       | NA | 100.0 | NA | 3 | NA | 3 | NA | 3 | NA | 13.5 |
| Isoform 3 of Protocadherin gamma-C3                                        | PCDHGC3   | NA | 100.0 | NA | 2 | NA | 2 | NA | 3 | NA | 0.0  |
| mTERF domain-containing protein 2                                          | MTERFD2   | NA | 100.0 | NA | 2 | NA | 2 | NA | 2 | NA | 7.4  |
| Zinc finger RNA-binding protein 2                                          | ZFR2      | NA | 100.0 | NA | 2 | NA | 2 | NA | 4 | NA | 0.0  |
| Isoform SERCA3A of Sarcoplasmic/endoplasmic reticulum calcium ATPase 3     | ATP2A3    | NA | 100.0 | NA | 2 | NA | 2 | NA | 2 | NA | 0.0  |
| Isoform 2 of Transcription cofactor HES-6                                  | HES6      | NA | 100.0 | NA | 2 | NA | 2 | NA | 2 | NA | 7.9  |
| Isoform 2 of Ankyrin repeat domain-containing protein 24                   | ANKRD24   | NA | 100.0 | NA | 2 | NA | 2 | NA | 2 | NA | 3.2  |
| Epiplakin                                                                  | EPPK1     | NA | 100.0 | NA | 5 | NA | 5 | NA | 5 | NA | 0.0  |
| Diacylglycerol kinase alpha                                                | DGKA      | NA | 100.0 | NA | 2 | NA | 2 | NA | 2 | NA | 4.6  |
| BTB/POZ domain-containing protein 10                                       | BTBD10    | NA | 100.0 | NA | 2 | NA | 2 | NA | 3 | NA | 5.1  |
| Ubiquitin carboxyl-terminal hydrolase                                      | USP19     | NA | 100.0 | NA | 2 | NA | 2 | NA | 2 | NA | 1.5  |
| Phosphatidylinositol 3,4,5-trisphosphate-dependent Rac exchanger 1 protein | PREX1     | NA | 100.0 | NA | 2 | NA | 2 | NA | 2 | NA | 0.0  |
| Isoform 2 of Centrosomal protein of 97 kDa                                 | CEP97     | NA | 100.0 | NA | 3 | NA | 3 | NA | 3 | NA | 6.4  |

|                                                                         |         |    |       |    |   |    |   |    |   |    |      |
|-------------------------------------------------------------------------|---------|----|-------|----|---|----|---|----|---|----|------|
| Isoform 10 of Voltage-dependent L-type calcium channel subunit alpha-1C | CACNA1C | NA | 100.0 | NA | 2 | NA | 2 | NA | 6 | NA | 0.0  |
| Sulfatase-modifying factor 2                                            | SUMF2   | NA | 100.0 | NA | 2 | NA | 2 | NA | 3 | NA | 5.3  |
| Myosin phosphatase Rho-interacting protein (Fragment)                   | MPRIP   | NA | 100.0 | NA | 2 | NA | 2 | NA | 2 | NA | 0.0  |
| Insulin-like growth factor-binding protein 6                            | IGFBP6  | NA | 100.0 | NA | 2 | NA | 2 | NA | 3 | NA | 10.4 |
| Ubiquitin-protein ligase E3A                                            | UBE3A   | NA | 99.9  | NA | 2 | NA | 2 | NA | 2 | NA | 3.7  |
| Fanconi anemia group A protein                                          | FANCA   | NA | 100.0 | NA | 2 | NA | 2 | NA | 3 | NA | 1.8  |
| Zinc finger protein ZPR1 (Fragment)                                     | ZNF259  | NA | 100.0 | NA | 2 | NA | 2 | NA | 2 | NA | 3.0  |
| Isoform 3 of PR domain zinc finger protein 2                            | PRDM2   | NA | 100.0 | NA | 2 | NA | 2 | NA | 2 | NA | 0.0  |
| Cathepsin D                                                             | CTSD    | NA | 100.0 | NA | 2 | NA | 3 | NA | 4 | NA | 6.8  |
| Isoform Short of Autism susceptibility gene 2 protein                   | AUTS2   | NA | 100.0 | NA | 2 | NA | 2 | NA | 2 | NA | 0.0  |
| Cartilage matrix protein                                                | MATN1   | NA | 100.0 | NA | 2 | NA | 2 | NA | 2 | NA | 0.0  |
| DNA transposase THAP9                                                   | THAP9   | NA | 100.0 | NA | 2 | NA | 2 | NA | 2 | NA | 2.9  |
| Centrosomal protein of 170 kDa (Fragment)                               | CEP170  | NA | 100.0 | NA | 3 | NA | 3 | NA | 3 | NA | 0.0  |
| Progesterone-induced-blocking factor 1                                  | PIBF1   | NA | 100.0 | NA | 2 | NA | 2 | NA | 2 | NA | 3.0  |
| Isoform 2 of AT-hook-containing transcription factor                    | AKNA    | NA | 100.0 | NA | 2 | NA | 2 | NA | 2 | NA | 0.7  |
| FRAS1-related extracellular matrix protein 2                            | FREM2   | NA | 100.0 | NA | 2 | NA | 2 | NA | 2 | NA | 1.1  |
| Zinc finger CCHC domain-containing protein 2 (Fragment)                 | ZCCHC2  | NA | 100.0 | NA | 2 | NA | 2 | NA | 2 | NA | 2.2  |
| Isoform 4 of Serine/threonine-protein kinase WNK2                       | WNK2    | NA | 100.0 | NA | 3 | NA | 3 | NA | 9 | NA | 0.0  |

|                                                          |          |    |       |    |   |    |   |    |   |    |      |
|----------------------------------------------------------|----------|----|-------|----|---|----|---|----|---|----|------|
| Inter-alpha-trypsin inhibitor heavy chain H6             | ITIH6    | NA | 100.0 | NA | 2 | NA | 2 | NA | 3 | NA | 0.0  |
| Zinc finger protein 33A                                  | ZNF33A   | NA | 100.0 | NA | 2 | NA | 2 | NA | 2 | NA | 0.0  |
| Coiled-coil domain-containing protein 102A               | CCDC102A | NA | 100.0 | NA | 2 | NA | 2 | NA | 3 | NA | 4.0  |
| Cutaneous T-cell lymphoma-associated antigen 5           | CTAGE5   | NA | 100.0 | NA | 2 | NA | 2 | NA | 5 | NA | 1.5  |
| Adipocyte enhancer-binding protein 1                     | AEBP1    | NA | 100.0 | NA | 2 | NA | 2 | NA | 2 | NA | 0.0  |
| Isoform 6 of Papilin                                     | PAPLN    | NA | 100.0 | NA | 2 | NA | 2 | NA | 2 | NA | 0.0  |
| E3 ubiquitin-protein ligase MIB2                         | MIB2     | NA | 100.0 | NA | 2 | NA | 2 | NA | 2 | NA | 3.8  |
| TIP41-like protein                                       | TIPRL    | NA | 100.0 | NA | 2 | NA | 2 | NA | 2 | NA | 0.0  |
| Coiled-coil domain-containing protein 150                | CCDC150  | NA | 100.0 | NA | 2 | NA | 2 | NA | 2 | NA | 2.2  |
| Slit homolog 1 protein                                   | SLIT1    | NA | 100.0 | NA | 2 | NA | 2 | NA | 3 | NA | 2.0  |
| Chitinase-3-like protein 1                               | CHI3L1   | NA | 100.0 | NA | 2 | NA | 2 | NA | 2 | NA | 0.0  |
| GRB2-associated and regulator of MAPK protein-like       | GAREML   | NA | 100.0 | NA | 2 | NA | 2 | NA | 3 | NA | 3.3  |
| Isoform 2 of Importin-4                                  | IPO4     | NA | 100.0 | NA | 2 | NA | 2 | NA | 2 | NA | 2.0  |
| Zinc finger and BTB domain-containing protein 1          | ZBTB1    | NA | 100.0 | NA | 2 | NA | 2 | NA | 2 | NA | 4.9  |
| Zinc finger homeobox protein 2                           | ZFHX2    | NA | 100.0 | NA | 2 | NA | 2 | NA | 2 | NA | 1.9  |
| Actin-related protein 5                                  | ACTR5    | NA | 100.0 | NA | 2 | NA | 2 | NA | 6 | NA | 2.8  |
| Kinesin-like protein KIF26B                              | KIF26B   | NA | 100.0 | NA | 2 | NA | 2 | NA | 2 | NA | 0.0  |
| E3 ubiquitin-protein ligase TTC3                         | TTC3     | NA | 100.0 | NA | 2 | NA | 2 | NA | 2 | NA | 0.0  |
| Isoform 6 of Fas-binding factor 1                        | FBF1     | NA | 100.0 | NA | 2 | NA | 2 | NA | 2 | NA | 1.8  |
| Neuron navigator 3                                       | NAV3     | NA | 100.0 | NA | 2 | NA | 2 | NA | 2 | NA | 1.0  |
| Isoform 4 of Breast cancer type 1 susceptibility protein | BRCA1    | NA | 100.0 | NA | 4 | NA | 4 | NA | 7 | NA | 0.0  |
| Dynein heavy chain 17, axonemal                          | DNAH17   | NA | 100.0 | NA | 4 | NA | 4 | NA | 4 | NA | 0.9  |
| 40S ribosomal protein S2                                 | RPS2     | NA | 100.0 | NA | 2 | NA | 2 | NA | 2 | NA | 12.6 |

|                                                                             |          |    |       |    |   |    |   |    |   |    |     |
|-----------------------------------------------------------------------------|----------|----|-------|----|---|----|---|----|---|----|-----|
| Zinc finger protein 518A                                                    | ZNF518A  | NA | 100.0 | NA | 2 | NA | 2 | NA | 2 | NA | 0.0 |
| Isoform 2 of Uncharacterized protein KIAA1586                               | KIAA1586 | NA | 100.0 | NA | 2 | NA | 2 | NA | 2 | NA | 3.3 |
| Ficolin-1                                                                   | FCN1     | NA | 100.0 | NA | 2 | NA | 2 | NA | 2 | NA | 8.9 |
| Pleckstrin homology domain-containing family H member 2                     | PLEKHH2  | NA | 100.0 | NA | 2 | NA | 2 | NA | 2 | NA | 0.0 |
| Structural maintenance of chromosomes protein 1A                            | SMC1A    | NA | 100.0 | NA | 2 | NA | 2 | NA | 2 | NA | 2.1 |
| Isoform 3 of Coiled-coil domain-containing protein 132                      | CCDC132  | NA | 100.0 | NA | 2 | NA | 2 | NA | 2 | NA | 0.0 |
| V-type proton ATPase subunit S1                                             | ATP6AP1  | NA | 100.0 | NA | 2 | NA | 2 | NA | 2 | NA | 4.7 |
| MON2 protein                                                                | MON2     | NA | 100.0 | NA | 2 | NA | 2 | NA | 2 | NA | 1.0 |
| Osteopetrosis-associated transmembrane protein 1                            | OSTM1    | NA | 100.0 | NA | 2 | NA | 2 | NA | 2 | NA | 9.0 |
| Anoctamin-3                                                                 | ANO3     | NA | 100.0 | NA | 2 | NA | 2 | NA | 2 | NA | 0.0 |
| Uncharacterized protein C2orf16                                             | C2orf16  | NA | 100.0 | NA | 2 | NA | 2 | NA | 3 | NA | 1.6 |
| Zinc finger protein 471                                                     | ZNF471   | NA | 100.0 | NA | 2 | NA | 2 | NA | 2 | NA | 0.0 |
| Isoform B of Annexin A13                                                    | ANXA13   | NA | 100.0 | NA | 2 | NA | 2 | NA | 7 | NA | 0.0 |
| Periostin                                                                   | POSTN    | NA | 100.0 | NA | 2 | NA | 2 | NA | 2 | NA | 3.2 |
| Diacylglycerol kinase iota                                                  | DGKI     | NA | 100.0 | NA | 2 | NA | 2 | NA | 2 | NA | 4.0 |
| Collagen alpha-1(III) chain                                                 | COL3A1   | NA | 100.0 | NA | 2 | NA | 2 | NA | 2 | NA | 0.0 |
| Isoform 2 of Multidrug resistance-associated protein 1                      | ABCC1    | NA | 100.0 | NA | 2 | NA | 2 | NA | 5 | NA | 0.0 |
| Isoform B of Disintegrin and metalloproteinase domain-containing protein 19 | ADAM19   | NA | 100.0 | NA | 2 | NA | 2 | NA | 2 | NA | 0.0 |
| tRNA (guanine(26)-N(2))-dimethyltransferase                                 | TRMT1    | NA | 100.0 | NA | 2 | NA | 2 | NA | 6 | NA | 2.7 |
| Microtubule-associated protein 1B                                           | MAP1B    | NA | 100.0 | NA | 2 | NA | 2 | NA | 3 | NA | 0.0 |
| Protein CBFA2T3                                                             | CBFA2T3  | NA | 100.0 | NA | 2 | NA | 2 | NA | 2 | NA | 3.9 |

|                                                                        |         |    |       |    |   |    |   |    |   |    |      |
|------------------------------------------------------------------------|---------|----|-------|----|---|----|---|----|---|----|------|
| G patch domain-containing protein 8                                    | GPATCH8 | NA | 100.0 | NA | 3 | NA | 3 | NA | 4 | NA | 0.0  |
| Roundabout homolog 3                                                   | ROBO3   | NA | 100.0 | NA | 2 | NA | 2 | NA | 2 | NA | 1.3  |
| DNA mismatch repair protein Msh6                                       | MSH6    | NA | 100.0 | NA | 2 | NA | 2 | NA | 2 | NA | 1.5  |
| Reversion-inducing cysteine-rich protein with Kazal motifs             | RECK    | NA | 100.0 | NA | 2 | NA | 2 | NA | 2 | NA | 3.6  |
| HEAT repeat-containing protein 3                                       | HEATR3  | NA | 100.0 | NA | 2 | NA | 2 | NA | 2 | NA | 0.0  |
| Cullin-9                                                               | CUL9    | NA | 100.0 | NA | 2 | NA | 2 | NA | 2 | NA | 0.9  |
| ATP-binding cassette sub-family F member 1                             | ABCF1   | NA | 99.9  | NA | 2 | NA | 2 | NA | 2 | NA | 0.0  |
| Isoform 2 of Protocadherin gamma-A2                                    | PCDHGA2 | NA | 99.9  | NA | 2 | NA | 2 | NA | 2 | NA | 0.0  |
| Iporin                                                                 | RUSC2   | NA | 100.0 | NA | 2 | NA | 2 | NA | 3 | NA | 2.8  |
| Actin, alpha skeletal muscle                                           | ACTA1   | NA | 100.0 | NA | 2 | NA | 2 | NA | 2 | NA | 26.8 |
| Isoform 2 of Golgin subfamily B member 1                               | GOLGB1  | NA | 100.0 | NA | 2 | NA | 2 | NA | 2 | NA | 0.6  |
| Isoform 3 of Cleavage and polyadenylation specificity factor subunit 7 | CPSF7   | NA | 100.0 | NA | 2 | NA | 2 | NA | 2 | NA | 0.0  |
| Down syndrome cell adhesion molecule-like protein 1                    | DSCAML1 | NA | 100.0 | NA | 2 | NA | 2 | NA | 2 | NA | 1.9  |
| Isoform 2 of Angiomotin-like protein 1                                 | AMOTL1  | NA | 100.0 | NA | 2 | NA | 2 | NA | 2 | NA | 2.4  |
| Isoform 2 of Partitioning defective 3 homolog B                        | PARD3B  | NA | 100.0 | NA | 2 | NA | 2 | NA | 2 | NA | 0.0  |
| Isoform 5 of Protein PRRC2C                                            | PRRC2C  | NA | 100.0 | NA | 2 | NA | 2 | NA | 2 | NA | 1.0  |
| DBIRD complex subunit ZNF326                                           | ZNF326  | NA | 100.0 | NA | 3 | NA | 3 | NA | 4 | NA | 0.0  |
| Isoform 3 of Unconventional prefoldin RPB5 interactor 1                | URI1    | NA | 99.9  | NA | 2 | NA | 2 | NA | 2 | NA | 6.7  |
| Endoplasmic reticulum metalloproteinase 1                              | ERMP1   | NA | 100.0 | NA | 2 | NA | 2 | NA | 2 | NA | 3.1  |
| DDB1- and CUL4-associated factor 8                                     | DCAF8   | NA | 100.0 | NA | 2 | NA | 2 | NA | 2 | NA | 0.0  |
| Protein-tyrosine sulfotransferase 1                                    | TPST1   | NA | 99.9  | NA | 2 | NA | 2 | NA | 2 | NA | 0.0  |

|                                                                          |         |    |       |    |   |    |   |    |   |    |      |
|--------------------------------------------------------------------------|---------|----|-------|----|---|----|---|----|---|----|------|
| Coiled-coil domain-containing protein 175                                | CCDC175 | NA | 100.0 | NA | 2 | NA | 2 | NA | 2 | NA | 0.0  |
| Filaggrin-2                                                              | FLG2    | NA | 100.0 | NA | 2 | NA | 2 | NA | 2 | NA | 0.9  |
| Mannosyl-oligosaccharide 1,2-alpha-mannosidase IA                        | MAN1A1  | NA | 100.0 | NA | 2 | NA | 2 | NA | 3 | NA | 3.4  |
| Adseverin                                                                | SCIN    | NA | 99.9  | NA | 2 | NA | 2 | NA | 4 | NA | 0.0  |
| Isoform 1 of Leucine-rich repeat-containing G-protein coupled receptor 6 | LGR6    | NA | 100.0 | NA | 2 | NA | 2 | NA | 2 | NA | 5.9  |
| Sarcalumenin                                                             | SRL     | NA | 100.0 | NA | 2 | NA | 2 | NA | 2 | NA | 0.0  |
| Isoform 3 of GON-4-like protein                                          | GON4L   | NA | 100.0 | NA | 3 | NA | 3 | NA | 3 | NA | 1.8  |
| Abnormal spindle-like microcephaly-associated protein                    | ASPM    | NA | 100.0 | NA | 3 | NA | 3 | NA | 3 | NA | 1.1  |
| Myosin-7                                                                 | MYH7    | NA | 100.0 | NA | 3 | NA | 3 | NA | 4 | NA | 2.0  |
| Cornifin-A                                                               | SPRR1A  | NA | 100.0 | NA | 2 | NA | 2 | NA | 2 | NA | 18.0 |
| Probable G-protein coupled receptor 125                                  | GPR125  | NA | 100.0 | NA | 4 | NA | 4 | NA | 5 | NA | 0.0  |
| Coiled-coil domain-containing protein 151                                | CCDC151 | NA | 100.0 | NA | 2 | NA | 2 | NA | 2 | NA | 0.0  |
| Isoform 2 of ATP-citrate synthase                                        | ACLY    | NA | 100.0 | NA | 2 | NA | 2 | NA | 2 | NA | 0.0  |
| Prostaglandin-H2 D-isomerase (Fragment)                                  | PTGDS   | NA | 100.0 | NA | 2 | NA | 2 | NA | 3 | NA | 15.5 |
| Zinc finger protein 142                                                  | ZNF142  | NA | 100.0 | NA | 2 | NA | 2 | NA | 2 | NA | 0.0  |
| Collagen alpha-1(VI) chain                                               | COL6A1  | NA | 100.0 | NA | 2 | NA | 2 | NA | 2 | NA | 1.9  |
| Isoform 3 of Histone-lysine N-methyltransferase MLL3                     | MLL3    | NA | 100.0 | NA | 3 | NA | 3 | NA | 3 | NA | 1.2  |
| Kalirin                                                                  | KALRN   | NA | 100.0 | NA | 2 | NA | 2 | NA | 2 | NA | 0.0  |
| Receptor-type tyrosine-protein phosphatase beta                          | PTPRB   | NA | 100.0 | NA | 3 | NA | 3 | NA | 3 | NA | 1.8  |
| Bromodomain adjacent to zinc finger domain protein 2B                    | BAZ2B   | NA | 100.0 | NA | 2 | NA | 2 | NA | 2 | NA | 0.0  |

|                                                                   |           |    |       |    |   |    |   |    |   |    |      |
|-------------------------------------------------------------------|-----------|----|-------|----|---|----|---|----|---|----|------|
| Spermatogenesis-associated protein 31C1                           | SPATA31C1 | NA | 100.0 | NA | 2 | NA | 2 | NA | 2 | NA | 0.0  |
| Double-stranded RNA-specific editase B2                           | ADARB2    | NA | 100.0 | NA | 2 | NA | 2 | NA | 2 | NA | 2.3  |
| Flavin reductase (NADPH)                                          | BLVRB     | NA | 100.0 | NA | 3 | NA | 3 | NA | 4 | NA | 23.8 |
| Isoform BMP1-7 of Bone morphogenetic protein 1                    | BMP1      | NA | 100.0 | NA | 2 | NA | 2 | NA | 2 | NA | 2.6  |
| Isoform ZA of Plasma membrane calcium-transporting ATPase 3       | ATP2B3    | NA | 100.0 | NA | 2 | NA | 2 | NA | 2 | NA | 0.0  |
| Huntingtin                                                        | HTT       | NA | 100.0 | NA | 2 | NA | 2 | NA | 2 | NA | 0.0  |
| A disintegrin and metalloproteinase with thrombospondin motifs 20 | ADAMTS20  | NA | 100.0 | NA | 2 | NA | 2 | NA | 2 | NA | 1.5  |
| E3 ubiquitin-protein ligase HECW1                                 | HECW1     | NA | 100.0 | NA | 2 | NA | 2 | NA | 3 | NA | 0.0  |
| Isoform 2 of Receptor-type tyrosine-protein phosphatase F         | PTPRF     | NA | 100.0 | NA | 5 | NA | 5 | NA | 5 | NA | 3.0  |
| Putative protein FAM74A3                                          | FAM74A3   | NA | 100.0 | NA | 2 | NA | 2 | NA | 2 | NA | 12.6 |
| Transitional endoplasmic reticulum ATPase                         | VCP       | NA | 100.0 | NA | 2 | NA | 2 | NA | 2 | NA | 0.0  |
| Isoform 3 of Uncharacterized protein C10orf68                     | C10orf68  | NA | 100.0 | NA | 2 | NA | 2 | NA | 4 | NA | 3.2  |
| Isoform 1 of Metabotropic glutamate receptor 5                    | GRM5      | NA | 100.0 | NA | 2 | NA | 2 | NA | 2 | NA | 0.0  |
| RNA-binding protein 44                                            | RBM44     | NA | 100.0 | NA | 2 | NA | 2 | NA | 2 | NA | 0.0  |
| Cell adhesion molecule 1 (Fragment)                               | CADM1     | NA | 100.0 | NA | 2 | NA | 2 | NA | 2 | NA | 6.3  |
| Heterogeneous nuclear ribonucleoprotein L                         | HNRNPL    | NA | 100.0 | NA | 2 | NA | 2 | NA | 2 | NA | 4.2  |
| APC membrane recruitment protein 2                                | AMER2     | NA | 100.0 | NA | 2 | NA | 2 | NA | 2 | NA | 0.0  |
| Coatomer subunit gamma-2                                          | COPG2     | NA | 99.9  | NA | 2 | NA | 2 | NA | 2 | NA | 3.1  |
| Sarcoplasmic reticulum histidine-rich calcium-binding protein     | HRC       | NA | 100.0 | NA | 2 | NA | 2 | NA | 2 | NA | 6.2  |

|                                                      |          |    |       |    |   |    |   |    |   |    |      |
|------------------------------------------------------|----------|----|-------|----|---|----|---|----|---|----|------|
| Sterile alpha motif domain-containing protein 9-like | SAMD9L   | NA | 100.0 | NA | 2 | NA | 2 | NA | 2 | NA | 1.7  |
| Isoform 2 of Ectopic P granules protein 5 homolog    | EPG5     | NA | 100.0 | NA | 2 | NA | 2 | NA | 2 | NA | 1.0  |
| Myosin-3                                             | MYH3     | NA | 100.0 | NA | 2 | NA | 2 | NA | 2 | NA | 0.0  |
| Serine/threonine-protein kinase LMTK2                | LMTK2    | NA | 100.0 | NA | 2 | NA | 2 | NA | 4 | NA | 1.6  |
| Isoform 2 of Neuralized-like protein 4               | NEURL4   | NA | 100.0 | NA | 2 | NA | 2 | NA | 2 | NA | 0.0  |
| Aflatoxin B1 aldehyde reductase member 2             | AKR7A2   | NA | 100.0 | NA | 2 | NA | 2 | NA | 3 | NA | 0.0  |
| Probable E3 ubiquitin-protein ligase TRIML2          | TRIML2   | NA | 100.0 | NA | 2 | NA | 2 | NA | 2 | NA | 0.0  |
| ADP-ribosylation factor GTPase-activating protein 3  | ARFGAP3  | NA | 100.0 | NA | 2 | NA | 2 | NA | 2 | NA | 8.1  |
| Isoform 2 of Ras GTPase-activating protein SynGAP    | SYNGAP1  | NA | 100.0 | NA | 2 | NA | 2 | NA | 2 | NA | 0.0  |
| Zinc finger protein 615                              | ZNF615   | NA | 100.0 | NA | 2 | NA | 2 | NA | 2 | NA | 2.3  |
| Metallophosphoesterase 1 (Fragment)                  | MPPE1    | NA | 100.0 | NA | 2 | NA | 2 | NA | 3 | NA | 6.8  |
| Uncharacterized protein KIAA1522                     | KIAA1522 | NA | 100.0 | NA | 2 | NA | 2 | NA | 2 | NA | 1.3  |
| Hydroxymethylglutaryl-CoA lyase, mitochondrial       | HMGCL    | NA | 100.0 | NA | 2 | NA | 2 | NA | 2 | NA | 0.0  |
| Acetyl-coenzyme A synthetase, cytoplasmic            | ACSS2    | NA | 99.9  | NA | 2 | NA | 2 | NA | 3 | NA | 2.3  |
| 4F2 cell-surface antigen heavy chain                 | SLC3A2   | NA | 100.0 | NA | 2 | NA | 2 | NA | 3 | NA | 3.0  |
| VPS10 domain-containing receptor SorCS2              | SORCS2   | NA | 100.0 | NA | 2 | NA | 2 | NA | 2 | NA | 0.0  |
| Thioredoxin reductase 2, mitochondrial               | TXNRD2   | NA | 100.0 | NA | 2 | NA | 2 | NA | 2 | NA | 6.1  |
| Serine/threonine-protein kinase pim-2                | PIM2     | NA | 99.9  | NA | 2 | NA | 2 | NA | 3 | NA | 9.0  |
| E3 ubiquitin-protein ligase Hakai                    | CBLL1    | NA | 100.0 | NA | 2 | NA | 2 | NA | 2 | NA | 35.8 |
| Alpha-parvin                                         | PARVA    | NA | 100.0 | NA | 2 | NA | 2 | NA | 4 | NA | 0.0  |



|                                                                                  |               |    |       |    |   |    |   |    |   |    |      |
|----------------------------------------------------------------------------------|---------------|----|-------|----|---|----|---|----|---|----|------|
| Zinc finger protein 543                                                          | ZNF543        | NA | 99.9  | NA | 2 | NA | 2 | NA | 2 | NA | 5.0  |
| Isoform 2 of Semaphorin-7A                                                       | SEMA7A        | NA | 100.0 | NA | 2 | NA | 2 | NA | 2 | NA | 6.6  |
| AT-rich interactive domain-containing protein 5B                                 | ARID5B        | NA | 100.0 | NA | 3 | NA | 3 | NA | 6 | NA | 4.4  |
| Isoform 4 of Mediator of RNA polymerase II transcription subunit 12-like protein | MED12L        | NA | 100.0 | NA | 2 | NA | 2 | NA | 2 | NA | 0.9  |
| Complement receptor type 2                                                       | CR2           | NA | 100.0 | NA | 2 | NA | 2 | NA | 2 | NA | 3.0  |
| Cohesin subunit SA-1                                                             | DKFZp781D1416 | NA | 100.0 | NA | 2 | NA | 2 | NA | 2 | NA | 1.9  |
| Isoform 2 of Cyclic nucleotide-gated cation channel alpha-3                      | CNGA3         | NA | 100.0 | NA | 2 | NA | 2 | NA | 3 | NA | 3.4  |
| von Willebrand factor A domain-containing protein 5B1                            | VWA5B1        | NA | 100.0 | NA | 2 | NA | 2 | NA | 2 | NA | 0.0  |
| Isoform 4 of Myotubularin-related protein 5                                      | SBF1          | NA | 100.0 | NA | 2 | NA | 2 | NA | 2 | NA | 0.0  |
| Isoform 2 of General transcription factor 3C polypeptide 1                       | GTF3C1        | NA | 100.0 | NA | 2 | NA | 2 | NA | 2 | NA | 0.0  |
| Sodium-driven chloride bicarbonate exchanger                                     | SLC4A10       | NA | 100.0 | NA | 2 | NA | 2 | NA | 2 | NA | 1.7  |
| Disks large homolog 2                                                            | DLG2          | NA | 99.9  | NA | 2 | NA | 2 | NA | 2 | NA | 4.9  |
| Peptidyl-prolyl cis-trans isomerase A                                            | PPIA          | NA | 100.0 | NA | 2 | NA | 2 | NA | 2 | NA | 10.9 |
| Heterochromatin protein 1-binding protein 3                                      | HP1BP3        | NA | 100.0 | NA | 2 | NA | 2 | NA | 3 | NA | 5.2  |
| Double-strand break repair protein MRE11A                                        | MRE11A        | NA | 100.0 | NA | 2 | NA | 2 | NA | 5 | NA | 2.4  |
| Tripeptidyl-peptidase 2                                                          | TPP2          | NA | 100.0 | NA | 2 | NA | 2 | NA | 6 | NA | 2.0  |
| Isoform 11 of Transient receptor potential cation channel subfamily M member 3   | TRPM3         | NA | 100.0 | NA | 2 | NA | 2 | NA | 2 | NA | 2.0  |

|                                                                          |         |    |       |    |   |    |   |    |    |    |      |
|--------------------------------------------------------------------------|---------|----|-------|----|---|----|---|----|----|----|------|
| Isoform 2 of Lipopolysaccharide-responsive and beige-like anchor protein | LRBA    | NA | 100.0 | NA | 2 | NA | 2 | NA | 3  | NA | 0.0  |
| Telomerase reverse transcriptase                                         | TERT    | NA | 100.0 | NA | 2 | NA | 2 | NA | 2  | NA | 0.0  |
| Golgin subfamily A member 2                                              | GOLGA2  | NA | 100.0 | NA | 2 | NA | 2 | NA | 2  | NA | 2.5  |
| Isoform 4 of M-phase inducer phosphatase 2                               | CDC25B  | NA | 100.0 | NA | 2 | NA | 2 | NA | 3  | NA | 0.0  |
| Isoform 2 of Ubiquitin carboxyl-terminal hydrolase 34                    | USP34   | NA | 100.0 | NA | 2 | NA | 2 | NA | 2  | NA | 0.0  |
| HCG2033702, isoform CRA_a                                                | PPAN    | NA | 100.0 | NA | 2 | NA | 2 | NA | 2  | NA | 0.0  |
| Reticulon-4                                                              | RTN4    | NA | 100.0 | NA | 2 | NA | 2 | NA | 11 | NA | 2.3  |
| PHD finger protein 12                                                    | PHF12   | NA | 100.0 | NA | 2 | NA | 2 | NA | 2  | NA | 2.9  |
| Integrin alpha-11                                                        | ITGA11  | NA | 100.0 | NA | 2 | NA | 2 | NA | 8  | NA | 0.0  |
| Histone-lysine N-methyltransferase MLL4                                  | WBP7    | NA | 100.0 | NA | 2 | NA | 2 | NA | 2  | NA | 1.1  |
| Fanconi anemia group J protein                                           | BRIP1   | NA | 100.0 | NA | 2 | NA | 2 | NA | 2  | NA | 0.0  |
| Isoform 3 of Thyroid adenoma-associated protein                          | THADA   | NA | 100.0 | NA | 3 | NA | 3 | NA | 3  | NA | 2.3  |
| Myosin-6                                                                 | MYH6    | NA | 100.0 | NA | 2 | NA | 2 | NA | 2  | NA | 0.0  |
| Hamartin                                                                 | TSC1    | NA | 100.0 | NA | 2 | NA | 2 | NA | 4  | NA | 1.5  |
| Mediator of RNA polymerase II transcription subunit 23                   | MED23   | NA | 100.0 | NA | 3 | NA | 3 | NA | 6  | NA | 3.3  |
| Protocadherin beta-9                                                     | PCDHB9  | NA | 100.0 | NA | 2 | NA | 2 | NA | 2  | NA | 0.0  |
| Isoform 1 of NACHT, LRR and PYD domains-containing protein 3             | NLRP3   | NA | 100.0 | NA | 2 | NA | 2 | NA | 3  | NA | 3.6  |
| Tubulin polymerization-promoting protein family member 2 (Fragment)      | TPPP2   | NA | 100.0 | NA | 2 | NA | 2 | NA | 2  | NA | 21.2 |
| Isoform 2 of Dipeptidyl peptidase 9                                      | DPP9    | NA | 100.0 | NA | 2 | NA | 2 | NA | 2  | NA | 2.5  |
| Prolyl 3-hydroxylase 2                                                   | LEPREL1 | NA | 100.0 | NA | 2 | NA | 2 | NA | 2  | NA | 3.8  |
| Apolipoprotein F                                                         | APOF    | NA | 100.0 | NA | 2 | NA | 2 | NA | 3  | NA | 7.7  |

|                                                                           |          |    |       |    |   |    |   |    |   |    |     |
|---------------------------------------------------------------------------|----------|----|-------|----|---|----|---|----|---|----|-----|
| Ryanodine receptor 3                                                      | RYR3     | NA | 100.0 | NA | 2 | NA | 2 | NA | 3 | NA | 0.0 |
| Uncharacterized protein C5orf42                                           | C5orf42  | NA | 100.0 | NA | 4 | NA | 4 | NA | 6 | NA | 0.0 |
| Isoform 2 of ADP-ribosylation factor-like protein 6-interacting protein 4 | ARL6IP4  | NA | 100.0 | NA | 2 | NA | 2 | NA | 2 | NA | 5.1 |
| Protocadherin Fat 1                                                       | FAT1     | NA | 100.0 | NA | 2 | NA | 2 | NA | 2 | NA | 0.9 |
| von Willebrand factor A domain-containing protein 2                       | VWA2     | NA | 100.0 | NA | 2 | NA | 2 | NA | 2 | NA | 2.5 |
| Wings apart-like protein homolog                                          | WAPAL    | NA | 100.0 | NA | 2 | NA | 2 | NA | 2 | NA | 0.0 |
| Isoform 3 of Pro-neuregulin-2, membrane-bound isoform                     | NRG2     | NA | 100.0 | NA | 2 | NA | 2 | NA | 2 | NA | 3.4 |
| Isoform PLD1D of Phospholipase D1                                         | PLD1     | NA | 100.0 | NA | 2 | NA | 2 | NA | 2 | NA | 3.7 |
| Ankyrin repeat domain-containing protein SOWAHD                           | SOWAHD   | NA | 99.9  | NA | 2 | NA | 2 | NA | 9 | NA | 7.6 |
| Nuclear pore membrane glycoprotein 210-like                               | NUP210L  | NA | 100.0 | NA | 2 | NA | 2 | NA | 3 | NA | 1.1 |
| Isoform 2 of Schlafen family member 14                                    | SLFN14   | NA | 100.0 | NA | 2 | NA | 2 | NA | 2 | NA | 0.0 |
| EMILIN-2                                                                  | EMILIN2  | NA | 100.0 | NA | 2 | NA | 2 | NA | 2 | NA | 0.0 |
| Insulinoma-associated protein 2                                           | INSM2    | NA | 100.0 | NA | 2 | NA | 2 | NA | 3 | NA | 4.2 |
| NADP-dependent malic enzyme, mitochondrial                                | ME3      | NA | 100.0 | NA | 2 | NA | 2 | NA | 2 | NA | 0.0 |
| Poly [ADP-ribose] polymerase 1                                            | PARP1    | NA | 100.0 | NA | 2 | NA | 2 | NA | 2 | NA | 0.0 |
| Rho guanine nucleotide exchange factor 1                                  | ARHGEF1  | NA | 100.0 | NA | 2 | NA | 2 | NA | 3 | NA | 0.0 |
| Ubiquitin carboxyl-terminal hydrolase                                     | USP15    | NA | 100.0 | NA | 2 | NA | 2 | NA | 2 | NA | 2.4 |
| Uncharacterized protein C10orf12                                          | C10orf12 | NA | 100.0 | NA | 2 | NA | 2 | NA | 2 | NA | 2.0 |
| Uncharacterized protein C18orf8                                           | C18orf8  | NA | 100.0 | NA | 2 | NA | 2 | NA | 2 | NA | 6.2 |
| Probable G-protein coupled receptor 110                                   | GPR110   | NA | 100.0 | NA | 2 | NA | 2 | NA | 2 | NA | 0.0 |
| Isoform 2 of Mast/stem cell growth factor receptor Kit                    | KIT      | NA | 100.0 | NA | 2 | NA | 2 | NA | 3 | NA | 3.8 |

|                                                                 |          |    |       |    |   |    |   |    |   |    |     |
|-----------------------------------------------------------------|----------|----|-------|----|---|----|---|----|---|----|-----|
| ATP-dependent RNA helicase DDX50                                | DDX50    | NA | 100.0 | NA | 2 | NA | 2 | NA | 2 | NA | 0.0 |
| Cardiomyopathy-associated protein 5                             | CMYA5    | NA | 100.0 | NA | 2 | NA | 2 | NA | 3 | NA | 0.0 |
| Serine/arginine repetitive matrix protein 2                     | SRRM2    | NA | 100.0 | NA | 2 | NA | 2 | NA | 2 | NA | 0.7 |
| Mis18-binding protein 1                                         | MIS18BP1 | NA | 100.0 | NA | 2 | NA | 2 | NA | 2 | NA | 1.7 |
| Isoform 3 of Putative E3 ubiquitin-protein ligase UNKL          | UNKL     | NA | 100.0 | NA | 2 | NA | 2 | NA | 2 | NA | 8.7 |
| Alstrom syndrome protein 1                                      | ALMS1    | NA | 100.0 | NA | 2 | NA | 2 | NA | 2 | NA | 0.0 |
| Suppressor of tumorigenicity 14 protein                         | ST14     | NA | 100.0 | NA | 2 | NA | 2 | NA | 3 | NA | 2.0 |
| Isoform 3 of Structural maintenance of chromosomes protein 1B   | SMC1B    | NA | 100.0 | NA | 3 | NA | 3 | NA | 3 | NA | 3.9 |
| NACHT, LRR and PYD domains-containing protein 4                 | NLRP4    | NA | 100.0 | NA | 2 | NA | 2 | NA | 2 | NA | 2.1 |
| Isoform III of AT-rich interactive domain-containing protein 4A | ARID4A   | NA | 100.0 | NA | 3 | NA | 3 | NA | 3 | NA | 0.0 |
| AT-rich interactive domain-containing protein 2                 | ARID2    | NA | 100.0 | NA | 2 | NA | 2 | NA | 2 | NA | 3.1 |
| Conserved oligomeric Golgi complex subunit 1                    | COG1     | NA | 100.0 | NA | 3 | NA | 3 | NA | 4 | NA | 0.0 |
| Isoform SV1 of Cyclin-dependent kinase 11A                      | CDK11A   | NA | 100.0 | NA | 2 | NA | 2 | NA | 2 | NA | 0.0 |
| Zinc finger protein 799                                         | ZNF799   | NA | 100.0 | NA | 2 | NA | 2 | NA | 2 | NA | 0.0 |
| Protein FAM65A                                                  | FAM65A   | NA | 100.0 | NA | 2 | NA | 3 | NA | 3 | NA | 0.0 |
| Gap junction alpha-10 protein                                   | GJA10    | NA | 100.0 | NA | 2 | NA | 2 | NA | 2 | NA | 5.3 |
| Isoform 3A of Myosin light chain kinase, smooth muscle          | MYLK     | NA | 100.0 | NA | 2 | NA | 2 | NA | 2 | NA | 2.3 |
| Leucine-rich repeat-containing protein 16C                      | RLTPR    | NA | 100.0 | NA | 2 | NA | 2 | NA | 2 | NA | 1.6 |
| Isoform 2 of Putative ribosomal RNA methyltransferase NOP2      | NOP2     | NA | 100.0 | NA | 3 | NA | 3 | NA | 3 | NA | 0.0 |

|                                                                  |         |    |       |    |   |    |   |    |   |    |      |
|------------------------------------------------------------------|---------|----|-------|----|---|----|---|----|---|----|------|
| Secreted phosphoprotein 24                                       | SPP2    | NA | 100.0 | NA | 2 | NA | 2 | NA | 2 | NA | 10.0 |
| DNA damage-binding protein 1                                     | DDB1    | NA | 100.0 | NA | 2 | NA | 2 | NA | 6 | NA | 0.0  |
| F-box only protein 38                                            | FBXO38  | NA | 100.0 | NA | 2 | NA | 2 | NA | 2 | NA | 2.4  |
| Isoform 4 of Transcription factor 7-like 2                       | TCF7L2  | NA | 100.0 | NA | 2 | NA | 2 | NA | 3 | NA | 4.8  |
| Isoform 2 of Protein arginine N-methyltransferase 1              | PRMT1   | NA | 100.0 | NA | 2 | NA | 2 | NA | 3 | NA | 0.0  |
| E3 ubiquitin-protein ligase MARCH7                               | MARCH7  | NA | 100.0 | NA | 2 | NA | 2 | NA | 2 | NA | 2.8  |
| Lethal(2) giant larvae protein homolog 1                         | LLGL1   | NA | 100.0 | NA | 2 | NA | 2 | NA | 2 | NA | 2.7  |
| Keratin-like protein KRT222                                      | KRT222  | NA | 100.0 | NA | 2 | NA | 2 | NA | 2 | NA | 11.9 |
| D site-binding protein                                           | DBP     | NA | 100.0 | NA | 2 | NA | 2 | NA | 2 | NA | 5.2  |
| Isoform 3 of Histone deacetylase complex subunit SAP130          | SAP130  | NA | 100.0 | NA | 2 | NA | 2 | NA | 2 | NA | 3.0  |
| Exostosin-like 3                                                 | EXTL3   | NA | 100.0 | NA | 2 | NA | 2 | NA | 3 | NA | 3.5  |
| Junctophilin-4                                                   | JPH4    | NA | 100.0 | NA | 2 | NA | 2 | NA | 2 | NA | 2.1  |
| Isoform 2 of Coiled-coil domain-containing protein 171           | CCDC171 | NA | 100.0 | NA | 2 | NA | 2 | NA | 2 | NA | 1.4  |
| Isoform 2 of Insulin-like growth factor II                       | IGF2    | NA | 100.0 | NA | 2 | NA | 3 | NA | 3 | NA | 13.7 |
| Heat shock 70 kDa protein 4L                                     | HSPA4L  | NA | 100.0 | NA | 2 | NA | 2 | NA | 2 | NA | 2.3  |
| Probable phospholipid-transporting ATPase IF                     | ATP11B  | NA | 100.0 | NA | 2 | NA | 2 | NA | 2 | NA | 0.0  |
| A disintegrin and metalloproteinase with thrombospondin motifs 5 | ADAMTS5 | NA | 100.0 | NA | 2 | NA | 2 | NA | 2 | NA | 0.0  |
| Isoform 3 of Myocardin                                           | MYOCD   | NA | 100.0 | NA | 2 | NA | 2 | NA | 2 | NA | 0.0  |
| Bifunctional protein NCOAT                                       | MGEA5   | NA | 99.9  | NA | 2 | NA | 2 | NA | 2 | NA | 4.2  |
| Isoform 2 of Heterogeneous nuclear ribonucleoprotein M           | HNRNPM  | NA | 100.0 | NA | 2 | NA | 2 | NA | 2 | NA | 4.2  |
| Isoform 3 of Mismatch repair endonuclease PMS2                   | PMS2    | NA | 100.0 | NA | 2 | NA | 2 | NA | 2 | NA | 4.4  |

|                                                                |        |    |       |    |   |    |   |    |   |    |      |
|----------------------------------------------------------------|--------|----|-------|----|---|----|---|----|---|----|------|
| Isoform 2 of Cyclin-dependent kinase-like 1                    | CDKL1  | NA | 100.0 | NA | 2 | NA | 2 | NA | 2 | NA | 1.3  |
| Isoform 4 of Tyrosine-protein phosphatase non-receptor type 13 | PTPN13 | NA | 100.0 | NA | 2 | NA | 2 | NA | 4 | NA | 0.0  |
| Isoform 2 of Protein kintoun                                   | DNAAF2 | NA | 100.0 | NA | 2 | NA | 2 | NA | 2 | NA | 3.9  |
| E3 ubiquitin-protein ligase TRIM36                             | TRIM36 | NA | 100.0 | NA | 2 | NA | 2 | NA | 3 | NA | 0.0  |
| Prolyl 4-hydroxylase subunit alpha-3                           | P4HA3  | NA | 100.0 | NA | 2 | NA | 2 | NA | 3 | NA | 7.0  |
| Actin-binding LIM protein 2                                    | ABLIM2 | NA | 100.0 | NA | 2 | NA | 2 | NA | 2 | NA | 0.0  |
| Probable phospholipid-transporting ATPase IM                   | ATP8B4 | NA | 100.0 | NA | 3 | NA | 3 | NA | 3 | NA | 2.4  |
| DNA replication factor Cdt1                                    | CDT1   | NA | 100.0 | NA | 2 | NA | 2 | NA | 3 | NA | 3.7  |
| RING finger protein 11                                         | RNF11  | NA | 99.9  | NA | 2 | NA | 2 | NA | 2 | NA | 25.3 |
| Heat shock 70 kDa protein 1-like                               | HSPA1L | NA | 100.0 | NA | 2 | NA | 2 | NA | 2 | NA | 3.0  |
| Isoform 2 of Golgin subfamily A member 3                       | GOLGA3 | NA | 100.0 | NA | 3 | NA | 3 | NA | 3 | NA | 2.7  |
| Zinc finger protein 821                                        | ZNF821 | NA | 100.0 | NA | 2 | NA | 2 | NA | 2 | NA | 0.0  |
| Protein kinase C theta type                                    | PRKCQ  | NA | 100.0 | NA | 2 | NA | 2 | NA | 2 | NA | 6.7  |
| Actin-related protein 3                                        | ACTR3  | NA | 100.0 | NA | 3 | NA | 3 | NA | 3 | NA | 17.0 |
| Isoform 2 of Ephrin type-A receptor 5                          | EPHA5  | NA | 100.0 | NA | 2 | NA | 2 | NA | 3 | NA | 3.2  |
| Phosphorylated CTD-interacting factor 1                        | PCIF1  | NA | 99.9  | NA | 2 | NA | 2 | NA | 2 | NA | 3.1  |
| Isoform 2 of Serine/threonine-protein kinase 19                | STK19  | NA | 100.0 | NA | 2 | NA | 2 | NA | 2 | NA | 7.4  |
| TBC1 domain family member 8                                    | TBC1D8 | NA | 100.0 | NA | 2 | NA | 2 | NA | 4 | NA | 1.8  |
| E3 ubiquitin-protein ligase RNF169                             | RNF169 | NA | 100.0 | NA | 2 | NA | 2 | NA | 2 | NA | 3.1  |
| Pseudouridylate synthase 7 homolog                             | PUS7   | NA | 100.0 | NA | 2 | NA | 2 | NA | 2 | NA | 0.0  |
| Out at first protein homolog                                   | OAF    | NA | 100.0 | NA | 2 | NA | 3 | NA | 4 | NA | 9.5  |
| Midnolin                                                       | MIDN   | NA | 100.0 | NA | 2 | NA | 2 | NA | 2 | NA | 0.0  |
| Brain-specific angiogenesis inhibitor 1                        | BAI1   | NA | 100.0 | NA | 2 | NA | 2 | NA | 2 | NA | 0.0  |

|                                                                                      |         |    |       |    |   |    |   |    |   |    |      |
|--------------------------------------------------------------------------------------|---------|----|-------|----|---|----|---|----|---|----|------|
| BAH and coiled-coil domain-containing protein 1                                      | BAHCC1  | NA | 100.0 | NA | 2 | NA | 2 | NA | 2 | NA | 0.0  |
| Isoform 3 of Vacuolar protein sorting-associated protein 13C                         | VPS13C  | NA | 100.0 | NA | 2 | NA | 2 | NA | 3 | NA | 0.0  |
| Sterol regulatory element-binding protein 2                                          | SREBF2  | NA | 100.0 | NA | 2 | NA | 2 | NA | 3 | NA | 0.0  |
| Otogelin                                                                             | OTOG    | NA | 100.0 | NA | 2 | NA | 2 | NA | 2 | NA | 0.0  |
| Bile salt export pump                                                                | ABCB11  | NA | 100.0 | NA | 2 | NA | 2 | NA | 3 | NA | 0.0  |
| Retrotransposon gag domain-containing protein 1                                      | RGAG1   | NA | 100.0 | NA | 3 | NA | 3 | NA | 6 | NA | 3.5  |
| PH-interacting protein                                                               | PHIP    | NA | 100.0 | NA | 2 | NA | 2 | NA | 2 | NA | 0.0  |
| Isoform 4 of Coiled-coil domain-containing protein 136                               | CCDC136 | NA | 100.0 | NA | 3 | NA | 3 | NA | 7 | NA | 0.0  |
| U2 small nuclear ribonucleoprotein auxiliary factor 35 kDa subunit-related protein 1 | ZRSR1   | NA | 100.0 | NA | 2 | NA | 2 | NA | 3 | NA | 6.1  |
| Isoform 2 of DNA topoisomerase 2-alpha                                               | TOP2A   | NA | 100.0 | NA | 3 | NA | 3 | NA | 5 | NA | 2.2  |
| Keratin, type II cytoskeletal 3                                                      | KRT3    | NA | 100.0 | NA | 2 | NA | 2 | NA | 2 | NA | 0.0  |
| Isoform 3 of Platelet glycoprotein VI                                                | GP6     | NA | 100.0 | NA | 2 | NA | 2 | NA | 2 | NA | 3.7  |
| Isoform 2 of Creatine kinase U-type, mitochondrial                                   | CKMT1A  | NA | 100.0 | NA | 2 | NA | 2 | NA | 3 | NA | 4.5  |
| Corepressor interacting with RBPJ 1                                                  | CIR1    | NA | 100.0 | NA | 2 | NA | 2 | NA | 2 | NA | 0.0  |
| Isoform 2 of Histone-lysine N-methyltransferase EZH1                                 | EZH1    | NA | 100.0 | NA | 2 | NA | 2 | NA | 3 | NA | 0.0  |
| Transcription factor E3                                                              | TFE3    | NA | 100.0 | NA | 2 | NA | 2 | NA | 3 | NA | 3.5  |
| 2-oxoglutarate dehydrogenase, mitochondrial                                          | OGDH    | NA | 100.0 | NA | 2 | NA | 2 | NA | 2 | NA | 0.0  |
| Heterogeneous nuclear ribonucleoprotein A1                                           | HNRNPA1 | NA | 100.0 | NA | 2 | NA | 2 | NA | 2 | NA | 13.8 |

|                                                                 |         |    |       |    |   |    |   |    |   |    |      |
|-----------------------------------------------------------------|---------|----|-------|----|---|----|---|----|---|----|------|
| Brefeldin A-inhibited guanine nucleotide-exchange protein 2     | ARFGEF2 | NA | 100.0 | NA | 2 | NA | 2 | NA | 2 | NA | 0.0  |
| Isoform 2 of N-acetylserotonin O-methyltransferase-like protein | ASMTL   | NA | 100.0 | NA | 2 | NA | 2 | NA | 2 | NA | 3.8  |
| Dedicator of cytokinesis protein 11                             | DOCK11  | NA | 100.0 | NA | 2 | NA | 2 | NA | 3 | NA | 0.8  |
| Isoform 2 of ELKS/Rab6-interacting/CAST family member 1         | ERC1    | NA | 100.0 | NA | 2 | NA | 2 | NA | 2 | NA | 1.8  |
| DNA helicase INO80                                              | INO80   | NA | 100.0 | NA | 2 | NA | 2 | NA | 2 | NA | 1.5  |
| Protein HEG homolog 1                                           | HEG1    | NA | 100.0 | NA | 2 | NA | 2 | NA | 2 | NA | 0.0  |
| Baculoviral IAP repeat-containing protein 6                     | BIRC6   | NA | 100.0 | NA | 2 | NA | 2 | NA | 2 | NA | 0.6  |
| CUB and sushi domain-containing protein 1                       | CSMD1   | NA | 100.0 | NA | 2 | NA | 2 | NA | 2 | NA | 0.0  |
| P2X purinoceptor                                                | P2RX4   | NA | 99.9  | NA | 2 | NA | 2 | NA | 2 | NA | 13.2 |
| Ubiquitin carboxyl-terminal hydrolase 1                         | USP1    | NA | 100.0 | NA | 2 | NA | 2 | NA | 4 | NA | 2.9  |
| 60S ribosomal protein L26 (Fragment)                            | RPL26   | NA | 100.0 | NA | 2 | NA | 2 | NA | 2 | NA | 11.3 |
| Isoform 2 of Serine/threonine-protein kinase ATR                | ATR     | NA | 100.0 | NA | 2 | NA | 2 | NA | 2 | NA | 0.0  |
| Programmed cell death 6-interacting protein                     | PDCD6IP | NA | 100.0 | NA | 2 | NA | 2 | NA | 2 | NA | 2.2  |
| AN1-type zinc finger protein 5 (Fragment)                       | ZFAND5  | NA | 100.0 | NA | 2 | NA | 2 | NA | 2 | NA | 16.6 |
| Isoform 3 of Neurabin-1                                         | PPP1R9A | NA | 100.0 | NA | 2 | NA | 2 | NA | 2 | NA | 0.0  |
| Grainyhead-like protein 1 homolog                               | GRHL1   | NA | 100.0 | NA | 2 | NA | 2 | NA | 2 | NA | 0.0  |
| Phosphoribosylformylglycinamide synthase                        | PFAS    | NA | 100.0 | NA | 2 | NA | 2 | NA | 2 | NA | 1.9  |
| Hydrocephalus-inducing protein homolog                          | HYDIN   | NA | 100.0 | NA | 2 | NA | 2 | NA | 2 | NA | 0.0  |
| Limb region 1 protein homolog                                   | LMBR1   | NA | 100.0 | NA | 2 | NA | 3 | NA | 7 | NA | 44.4 |



|                                                              |         |    |       |    |   |    |   |    |   |    |      |
|--------------------------------------------------------------|---------|----|-------|----|---|----|---|----|---|----|------|
| Isoform 2 of p53-induced protein with a death domain         | PIDD    | NA | 100.0 | NA | 2 | NA | 2 | NA | 2 | NA | 2.5  |
| Rab GTPase-binding effector protein 1                        | RABEP1  | NA | 100.0 | NA | 2 | NA | 2 | NA | 3 | NA | 0.0  |
| Kinesin-like protein KIF26A                                  | KIF26A  | NA | 100.0 | NA | 3 | NA | 3 | NA | 3 | NA | 1.4  |
| Isoform 2 of Bcl-2-associated transcription factor 1         | BCLAF1  | NA | 100.0 | NA | 2 | NA | 2 | NA | 3 | NA | 0.0  |
| GEM-interacting protein                                      | GMIP    | NA | 100.0 | NA | 2 | NA | 2 | NA | 2 | NA | 2.0  |
| Protein disulfide-isomerase A4                               | PDIA4   | NA | 100.0 | NA | 2 | NA | 2 | NA | 2 | NA | 0.0  |
| Type I inositol 3,4-bisphosphate 4-phosphatase               | INPP4A  | NA | 100.0 | NA | 3 | NA | 3 | NA | 3 | NA | 4.7  |
| Collagen alpha-1(XVI) chain                                  | COL16A1 | NA | 100.0 | NA | 2 | NA | 2 | NA | 2 | NA | 0.0  |
| Integrator complex subunit 1                                 | INTS1   | NA | 100.0 | NA | 2 | NA | 2 | NA | 2 | NA | 0.0  |
| Dorsal root ganglia homeobox protein                         | DRGX    | NA | 100.0 | NA | 2 | NA | 2 | NA | 2 | NA | 10.1 |
| Isoform 2 of Solute carrier family 35 member F3              | SLC35F3 | NA | 100.0 | NA | 2 | NA | 2 | NA | 2 | NA | 0.0  |
| Isoform 2 of Triosephosphate isomerase                       | TPI1    | NA | 100.0 | NA | 3 | NA | 3 | NA | 3 | NA | 23.3 |
| Isoform 2 of Latrophilin-1                                   | LPHN1   | NA | 100.0 | NA | 2 | NA | 2 | NA | 2 | NA | 0.0  |
| Isoform 2 of Host cell factor 1                              | HCFC1   | NA | 100.0 | NA | 2 | NA | 2 | NA | 2 | NA | 0.0  |
| NK-tumor recognition protein                                 | NKTR    | NA | 100.0 | NA | 2 | NA | 2 | NA | 3 | NA | 0.0  |
| Doublecortin domain-containing protein 5                     | DCDC5   | NA | 100.0 | NA | 2 | NA | 2 | NA | 3 | NA | 1.4  |
| Insulin-like growth factor-binding protein 5                 | IGFBP5  | NA | 100.0 | NA | 2 | NA | 2 | NA | 2 | NA | 9.2  |
| Isoform 2 of DNA (cytosine-5)-methyltransferase 1            | DNMT1   | NA | 100.0 | NA | 3 | NA | 3 | NA | 6 | NA | 2.4  |
| General transcription factor 3C polypeptide 3                | GTF3C3  | NA | 100.0 | NA | 2 | NA | 2 | NA | 2 | NA | 0.0  |
| Isoform 3 of Fermitin family homolog 2                       | FERMT2  | NA | 100.0 | NA | 2 | NA | 2 | NA | 2 | NA | 0.0  |
| Isoform 4 of WD repeat- and FYVE domain-containing protein 4 | WDFY4   | NA | 100.0 | NA | 2 | NA | 2 | NA | 2 | NA | 0.0  |

|                                                                             |          |    |       |    |   |    |   |    |   |    |     |
|-----------------------------------------------------------------------------|----------|----|-------|----|---|----|---|----|---|----|-----|
| Phosphatidylinositol 4-phosphate 3-kinase C2 domain-containing subunit beta | PIK3C2B  | NA | 100.0 | NA | 2 | NA | 2 | NA | 3 | NA | 1.5 |
| Isoform 2 of OTU domain-containing protein 7A                               | OTUD7A   | NA | 100.0 | NA | 2 | NA | 2 | NA | 2 | NA | 0.0 |
| Isoform 4 of Uncharacterized protein KIAA1109                               | KIAA1109 | NA | 100.0 | NA | 4 | NA | 4 | NA | 4 | NA | 0.0 |
| Leucine-rich repeats and immunoglobulin-like domains protein 1              | LRIG1    | NA | 100.0 | NA | 2 | NA | 2 | NA | 2 | NA | 2.7 |
| Acetyl-CoA acetyltransferase, mitochondrial                                 | ACAT1    | NA | 100.0 | NA | 2 | NA | 2 | NA | 2 | NA | 0.0 |
| Uncharacterized protein KIAA0556                                            | KIAA0556 | NA | 100.0 | NA | 3 | NA | 3 | NA | 5 | NA | 1.9 |
| Hypoxia up-regulated protein 1                                              | HYOU1    | NA | 100.0 | NA | 2 | NA | 2 | NA | 2 | NA | 2.1 |
| Secretogranin-2                                                             | SCG2     | NA | 100.0 | NA | 2 | NA | 2 | NA | 2 | NA | 3.1 |
| Proline dehydrogenase 1, mitochondrial                                      | PRODH    | NA | 100.0 | NA | 2 | NA | 2 | NA | 2 | NA | 0.0 |
| Partner and localizer of BRCA2                                              | PALB2    | NA | 100.0 | NA | 2 | NA | 2 | NA | 4 | NA | 0.0 |
| ADAMTS-like protein 1                                                       | ADAMTSL1 | NA | 100.0 | NA | 2 | NA | 2 | NA | 2 | NA | 0.0 |
| Isoform 2 of Zinc finger protein 568                                        | ZNF568   | NA | 99.9  | NA | 2 | NA | 2 | NA | 2 | NA | 0.0 |
| Isoform 2 of Striatin                                                       | STRN     | NA | 100.0 | NA | 2 | NA | 2 | NA | 2 | NA | 0.0 |
| Sister chromatid cohesion protein PDS5 homolog A                            | PDS5A    | NA | 100.0 | NA | 2 | NA | 2 | NA | 2 | NA | 1.4 |
| Neurexin-2                                                                  | NRXN2    | NA | 100.0 | NA | 2 | NA | 2 | NA | 3 | NA | 1.2 |
| Nucleolar MIF4G domain-containing protein 1                                 | NOM1     | NA | 100.0 | NA | 2 | NA | 2 | NA | 2 | NA | 0.0 |
| Isoform 2 of Exophilin-5                                                    | EXPH5    | NA | 100.0 | NA | 2 | NA | 2 | NA | 2 | NA | 0.9 |
| DOCK10.2                                                                    | DOCK10.2 | NA | 100.0 | NA | 2 | NA | 2 | NA | 5 | NA | 0.0 |
| DNA polymerase nu                                                           | POLN     | NA | 100.0 | NA | 2 | NA | 2 | NA | 2 | NA | 3.1 |
| Signal peptide, CUB and EGF-like domain-containing protein 1                | SCUBE1   | NA | 100.0 | NA | 2 | NA | 2 | NA | 2 | NA | 0.0 |
| PRMT2 alpha variant                                                         | PRMT2    | NA | 100.0 | NA | 2 | NA | 2 | NA | 2 | NA | 6.6 |

|                                                           |         |    |       |    |   |    |   |    |   |    |      |
|-----------------------------------------------------------|---------|----|-------|----|---|----|---|----|---|----|------|
| Lysine-specific demethylase 6A                            | KDM6A   | NA | 100.0 | NA | 2 | NA | 2 | NA | 2 | NA | 1.3  |
| Retinoic acid receptor responder protein 2                | RARRES2 | NA | 100.0 | NA | 3 | NA | 3 | NA | 4 | NA | 21.5 |
| Tetratricopeptide repeat protein GNN                      | GNN     | NA | 100.0 | NA | 2 | NA | 2 | NA | 2 | NA | 0.0  |
| Importin-7                                                | IPO7    | NA | 100.0 | NA | 2 | NA | 2 | NA | 2 | NA | 4.1  |
| Alpha-actinin-4                                           | ACTN4   | NA | 100.0 | NA | 2 | NA | 2 | NA | 2 | NA | 0.0  |
| Voltage-dependent R-type calcium channel subunit alpha-1E | CACNA1E | NA | 100.0 | NA | 2 | NA | 2 | NA | 2 | NA | 1.3  |
| Isoform 2 of Sialoadhesin                                 | SIGLEC1 | NA | 100.0 | NA | 2 | NA | 2 | NA | 2 | NA | 0.0  |
| Ubinuclein-2                                              | UBN2    | NA | 100.0 | NA | 2 | NA | 2 | NA | 2 | NA | 1.6  |
| Teneurin-4                                                | TENM4   | NA | 100.0 | NA | 2 | NA | 2 | NA | 2 | NA | 1.1  |
| Centrosomal protein of 135 kDa                            | CEP135  | NA | 100.0 | NA | 2 | NA | 2 | NA | 2 | NA | 0.0  |
| Peptidyl-prolyl cis-trans isomerase B                     | PPIB    | NA | 100.0 | NA | 2 | NA | 2 | NA | 2 | NA | 7.4  |
| Serine/threonine-protein kinase LMTK1                     | AATK    | NA | 100.0 | NA | 3 | NA | 3 | NA | 4 | NA | 2.7  |
| Isoform 3 of GRAM domain-containing protein 1A            | GRAMD1A | NA | 100.0 | NA | 2 | NA | 2 | NA | 2 | NA | 3.1  |
| Isoform 2 of WD repeat-containing protein 35              | WDR35   | NA | 100.0 | NA | 2 | NA | 2 | NA | 2 | NA | 2.7  |
| Coiled-coil domain-containing protein 96                  | CCDC96  | NA | 100.0 | NA | 2 | NA | 2 | NA | 2 | NA | 0.0  |
| Transferrin receptor protein 1                            | TFRC    | NA | 100.0 | NA | 2 | NA | 2 | NA | 3 | NA | 3.0  |
| Myomegalin                                                | PDE4DIP | NA | 100.0 | NA | 3 | NA | 3 | NA | 3 | NA | 1.4  |
| Isoform 3 of Apolipoprotein B receptor                    | APOBR   | NA | 100.0 | NA | 4 | NA | 4 | NA | 4 | NA | 3.7  |
| Annexin A10                                               | ANXA10  | NA | 100.0 | NA | 2 | NA | 2 | NA | 2 | NA | 9.0  |
| Unconventional myosin-Vc                                  | MYO5C   | NA | 100.0 | NA | 2 | NA | 2 | NA | 2 | NA | 0.0  |
| Protein FAM65C                                            | FAM65C  | NA | 100.0 | NA | 2 | NA | 2 | NA | 2 | NA | 2.5  |
| Isoform 2 of Protein atonal homolog 8                     | ATOH8   | NA | 100.0 | NA | 2 | NA | 2 | NA | 2 | NA | 8.2  |
| Isoform 2 of TGF-beta receptor type-2                     | TGFBR2  | NA | 100.0 | NA | 2 | NA | 2 | NA | 3 | NA | 5.2  |
| Isoform 2 of Rhophilin-1                                  | RHPN1   | NA | 100.0 | NA | 2 | NA | 2 | NA | 5 | NA | 0.0  |

|                                                                          |          |    |       |    |   |    |   |    |   |    |      |
|--------------------------------------------------------------------------|----------|----|-------|----|---|----|---|----|---|----|------|
| Isoform 2 of BEN domain-containing protein 2                             | BEND2    | NA | 99.9  | NA | 2 | NA | 3 | NA | 3 | NA | 4.8  |
| E3 ubiquitin-protein ligase HERC2                                        | HERC2    | NA | 100.0 | NA | 3 | NA | 4 | NA | 5 | NA | 0.0  |
| Tyrosine-protein kinase Fer                                              | FER      | NA | 100.0 | NA | 2 | NA | 2 | NA | 3 | NA | 0.0  |
| Vascular endothelial growth factor receptor 3                            | FLT4     | NA | 100.0 | NA | 3 | NA | 3 | NA | 5 | NA | 4.0  |
| SMT3 suppressor of mif two 3 homolog 3 (Yeast), isoform CRA_d            | SUMO3    | NA | 100.0 | NA | 2 | NA | 2 | NA | 2 | NA | 24.4 |
| StAR-related lipid transfer protein 9                                    | STARD9   | NA | 100.0 | NA | 3 | NA | 3 | NA | 4 | NA | 0.0  |
| Isoform 2 of Tripartite motif-containing protein 55                      | TRIM55   | NA | 100.0 | NA | 3 | NA | 3 | NA | 4 | NA | 5.8  |
| Disco-interacting protein 2 homolog A                                    | DIP2A    | NA | 100.0 | NA | 3 | NA | 3 | NA | 3 | NA | 0.0  |
| Meiosis arrest female protein 1                                          | KIAA0430 | NA | 100.0 | NA | 2 | NA | 2 | NA | 2 | NA | 0.0  |
| E3 ubiquitin-protein ligase DZIP3                                        | DZIP3    | NA | 100.0 | NA | 2 | NA | 2 | NA | 2 | NA | 0.0  |
| Twisted gastrulation protein homolog 1                                   | TWSG1    | NA | 100.0 | NA | 2 | NA | 2 | NA | 2 | NA | 17.9 |
| Ezrin                                                                    | EZR      | NA | 100.0 | NA | 2 | NA | 2 | NA | 2 | NA | 3.8  |
| Band 4.1-like protein 2                                                  | EPB41L2  | NA | 100.0 | NA | 2 | NA | 2 | NA | 2 | NA | 2.9  |
| Diacylglycerol kinase kappa                                              | DGKK     | NA | 100.0 | NA | 2 | NA | 2 | NA | 3 | NA | 1.4  |
| Isoform 5 of Maestro heat-like repeat-containing protein family member 7 | MROH7    | NA | 100.0 | NA | 2 | NA | 2 | NA | 3 | NA | 2.5  |
| Isoform 2 of Testis-specific serine kinase substrate                     | TSKS     | NA | 99.9  | NA | 2 | NA | 2 | NA | 2 | NA | 0.0  |
| Voltage-dependent T-type calcium channel subunit alpha-1I                | CACNA1I  | NA | 100.0 | NA | 2 | NA | 2 | NA | 2 | NA | 1.0  |
| Isoform 2 of Probable ATP-dependent RNA helicase DDX4                    | DDX4     | NA | 100.0 | NA | 2 | NA | 2 | NA | 3 | NA | 0.0  |
| Isoform 3 of Acid-sensing ion channel 4                                  | ASIC4    | NA | 100.0 | NA | 2 | NA | 2 | NA | 2 | NA | 5.9  |
| Isoform 2 of Zinc finger homeobox protein 4                              | ZFHX4    | NA | 100.0 | NA | 2 | NA | 2 | NA | 2 | NA | 0.0  |

|                                                                    |          |    |       |    |   |    |   |    |   |    |      |
|--------------------------------------------------------------------|----------|----|-------|----|---|----|---|----|---|----|------|
| Steroid 17-alpha-hydroxylase/17,20 lyase                           | CYP17A1  | NA | 100.0 | NA | 2 | NA | 2 | NA | 5 | NA | 0.0  |
| Isoform 6 of Transcription factor TFIIB component B" homolog       | BDP1     | NA | 100.0 | NA | 2 | NA | 2 | NA | 2 | NA | 0.0  |
| Isoform 5 of Putative helicase Mov10I1                             | MOV10L1  | NA | 100.0 | NA | 2 | NA | 2 | NA | 3 | NA | 0.0  |
| Isoform 2 of Ral GTPase-activating protein subunit alpha-1         | RALGAPA1 | NA | 100.0 | NA | 2 | NA | 2 | NA | 2 | NA | 0.9  |
| Dynein heavy chain 5, axonemal                                     | DNAH5    | NA | 100.0 | NA | 4 | NA | 4 | NA | 4 | NA | 0.0  |
| T-box transcription factor TBX2                                    | TBX2     | NA | 100.0 | NA | 2 | NA | 2 | NA | 2 | NA | 3.2  |
| Probable G-protein coupled receptor 19                             | GPR19    | NA | 99.9  | NA | 2 | NA | 2 | NA | 2 | NA | 5.1  |
| SHC-transforming protein 3                                         | SHC3     | NA | 100.0 | NA | 2 | NA | 2 | NA | 2 | NA | 0.0  |
| DENN domain-containing protein 5A                                  | DENND5A  | NA | 100.0 | NA | 2 | NA | 2 | NA | 2 | NA | 2.0  |
| Isoform 2 of Bromodomain adjacent to zinc finger domain protein 1A | BAZ1A    | NA | 100.0 | NA | 2 | NA | 2 | NA | 2 | NA | 0.0  |
| Serum amyloid A-2 protein                                          | SAA2     | NA | 100.0 | NA | 2 | NA | 2 | NA | 2 | NA | 51.6 |
| Dystrophia myotonica WD repeat-containing protein                  | DMWD     | NA | 100.0 | NA | 2 | NA | 2 | NA | 2 | NA | 3.9  |
| Isoform 2 of Cytoskeleton-associated protein 5                     | CKAP5    | NA | 100.0 | NA | 2 | NA | 2 | NA | 5 | NA | 1.2  |
| NACHT, LRR and PYD domains-containing protein 7                    | NLRP7    | NA | 100.0 | NA | 2 | NA | 2 | NA | 4 | NA | 0.0  |
| Probable E3 ubiquitin-protein ligase HECTD4                        | HECTD4   | NA | 100.0 | NA | 2 | NA | 2 | NA | 2 | NA | 0.0  |
| Motile sperm domain-containing protein 2                           | MOSPD2   | NA | 100.0 | NA | 2 | NA | 2 | NA | 2 | NA | 0.0  |
| Uncharacterized protein C1orf65                                    | C1orf65  | NA | 100.0 | NA | 2 | NA | 2 | NA | 2 | NA | 0.0  |
| Collagen alpha-1(XV) chain                                         | COL15A1  | NA | 100.0 | NA | 2 | NA | 2 | NA | 2 | NA | 0.0  |
| Protein FAM87A                                                     | FAM87A   | NA | 100.0 | NA | 2 | NA | 2 | NA | 3 | NA | 9.8  |
| Serine/threonine-protein kinase SMG1                               | SMG1     | NA | 100.0 | NA | 2 | NA | 2 | NA | 2 | NA | 0.0  |

|                                                                 |           |    |       |    |   |    |   |    |   |    |      |
|-----------------------------------------------------------------|-----------|----|-------|----|---|----|---|----|---|----|------|
| ATPase family AAA domain-containing protein 5                   | ATAD5     | NA | 100.0 | NA | 2 | NA | 2 | NA | 2 | NA | 0.0  |
| Probable E3 ubiquitin-protein ligase RNF144A                    | RNF144A   | NA | 100.0 | NA | 3 | NA | 3 | NA | 3 | NA | 8.9  |
| Short transient receptor potential channel 4-associated protein | TRPC4AP   | NA | 100.0 | NA | 2 | NA | 2 | NA | 2 | NA | 0.0  |
| Isoform 2 of PHD finger protein 3                               | PHF3      | NA | 100.0 | NA | 3 | NA | 3 | NA | 3 | NA | 0.0  |
| Ubiquitin carboxyl-terminal hydrolase 48                        | USP48     | NA | 100.0 | NA | 2 | NA | 2 | NA | 2 | NA | 0.0  |
| Methionine--tRNA ligase, mitochondrial                          | MARS2     | NA | 100.0 | NA | 2 | NA | 2 | NA | 2 | NA | 4.1  |
| Isoform 2 of Polycystin-1                                       | PKD1      | NA | 100.0 | NA | 2 | NA | 2 | NA | 3 | NA | 0.4  |
| Angiotensin-related protein 6                                   | ANGPTL6   | NA | 100.0 | NA | 2 | NA | 2 | NA | 2 | NA | 0.0  |
| Serine-rich coiled-coil domain-containing protein 1             | CCSER1    | NA | 100.0 | NA | 2 | NA | 2 | NA | 2 | NA | 2.3  |
| Isoform 4 of Tensin-like C1 domain-containing phosphatase       | TENC1     | NA | 100.0 | NA | 2 | NA | 2 | NA | 2 | NA | 1.9  |
| Probable ATP-dependent RNA helicase DDX27                       | DDX27     | NA | 100.0 | NA | 3 | NA | 4 | NA | 6 | NA | 3.0  |
| Uncharacterized protein C16orf71                                | C16orf71  | NA | 100.0 | NA | 2 | NA | 2 | NA | 2 | NA | 5.8  |
| Kelch-like protein 22 (Fragment)                                | KLHL22    | NA | 100.0 | NA | 3 | NA | 3 | NA | 3 | NA | 12.3 |
| Arginine-glutamic acid dipeptide (RE) repeats, isoform CRA_b    | RERE      | NA | 100.0 | NA | 2 | NA | 2 | NA | 3 | NA | 0.0  |
| UPF0606 protein KIAA1549L                                       | KIAA1549L | NA | 100.0 | NA | 2 | NA | 2 | NA | 2 | NA | 2.0  |
| Lariat debranching enzyme                                       | DBR1      | NA | 100.0 | NA | 2 | NA | 2 | NA | 5 | NA | 4.0  |
| Hyccin (Fragment)                                               | FAM126A   | NA | 100.0 | NA | 2 | NA | 2 | NA | 2 | NA | 4.7  |
| Receptor-transporting protein 3                                 | RTP3      | NA | 99.9  | NA | 2 | NA | 3 | NA | 3 | NA | 15.1 |
| Isoform 2 of Lysine-specific demethylase 5D                     | KDM5D     | NA | 100.0 | NA | 3 | NA | 3 | NA | 3 | NA | 2.0  |
| E3 ubiquitin-protein ligase SHPRH                               | SHPRH     | NA | 100.0 | NA | 2 | NA | 3 | NA | 6 | NA | 1.4  |

|                                                                      |          |    |       |    |   |    |   |    |   |    |      |
|----------------------------------------------------------------------|----------|----|-------|----|---|----|---|----|---|----|------|
| RNA binding motif protein, X-linked-like-1                           | RBMXL1   | NA | 100.0 | NA | 2 | NA | 2 | NA | 2 | NA | 0.0  |
| MAX gene-associated protein                                          | MGA      | NA | 100.0 | NA | 3 | NA | 3 | NA | 3 | NA | 0.0  |
| V-type proton ATPase 116 kDa subunit a isoform 4                     | ATP6V0A4 | NA | 100.0 | NA | 2 | NA | 2 | NA | 2 | NA | 0.0  |
| Fibrillin-1                                                          | FBN1     | NA | 100.0 | NA | 2 | NA | 2 | NA | 2 | NA | 0.0  |
| Fructose-bisphosphate aldolase B                                     | ALDOB    | NA | 100.0 | NA | 2 | NA | 3 | NA | 3 | NA | 7.1  |
| RNA polymerase I-specific transcription initiation factor RRN3       | RRN3     | NA | 100.0 | NA | 2 | NA | 2 | NA | 3 | NA | 0.0  |
| Cullin-5                                                             | CUL5     | NA | 100.0 | NA | 2 | NA | 2 | NA | 4 | NA | 2.8  |
| Collagen alpha-1(IV) chain                                           | COL4A1   | NA | 100.0 | NA | 2 | NA | 2 | NA | 2 | NA | 2.2  |
| DNA replication licensing factor MCM6                                | MCM6     | NA | 100.0 | NA | 2 | NA | 2 | NA | 2 | NA | 3.3  |
| Isoform 3a of Neurexin-1                                             | NRXN1    | NA | 100.0 | NA | 2 | NA | 2 | NA | 2 | NA | 1.7  |
| Pinin                                                                | PNN      | NA | 100.0 | NA | 2 | NA | 2 | NA | 2 | NA | 6.7  |
| Cytochrome P450 4A11                                                 | CYP4A11  | NA | 100.0 | NA | 2 | NA | 2 | NA | 2 | NA | 4.4  |
| Glutamate dehydrogenase 2, mitochondrial                             | GLUD2    | NA | 100.0 | NA | 3 | NA | 3 | NA | 3 | NA | 0.0  |
| Midasin                                                              | MDN1     | NA | 100.0 | NA | 2 | NA | 2 | NA | 2 | NA | 0.4  |
| Proto-oncogene vav                                                   | VAV1     | NA | 100.0 | NA | 2 | NA | 2 | NA | 2 | NA | 2.3  |
| Isoform 2 of Contactin-1                                             | CNTN1    | NA | 100.0 | NA | 3 | NA | 3 | NA | 3 | NA | 3.6  |
| Dual specificity protein phosphatase 5                               | DUSP5    | NA | 100.0 | NA | 2 | NA | 2 | NA | 3 | NA | 0.0  |
| X-linked retinitis pigmentosa GTPase regulator-interacting protein 1 | RPGRIP1  | NA | 100.0 | NA | 3 | NA | 3 | NA | 3 | NA | 4.0  |
| Isoform 3 of ATP-dependent DNA helicase PIF1                         | PIF1     | NA | 100.0 | NA | 2 | NA | 2 | NA | 2 | NA | 4.1  |
| Isoform 2 of Tyrosine-protein kinase BAZ1B                           | BAZ1B    | NA | 100.0 | NA | 2 | NA | 2 | NA | 2 | NA | 1.8  |
| Oral-facial-digital syndrome 1 protein                               | OFD1     | NA | 100.0 | NA | 3 | NA | 3 | NA | 3 | NA | 4.5  |
| Protein FAM186A                                                      | FAM186A  | NA | 100.0 | NA | 2 | NA | 2 | NA | 2 | NA | 0.0  |
| Transgelin-2                                                         | TAGLN2   | NA | 100.0 | NA | 3 | NA | 3 | NA | 3 | NA | 18.6 |

|                                                                                               |          |    |       |    |   |    |   |    |    |    |      |
|-----------------------------------------------------------------------------------------------|----------|----|-------|----|---|----|---|----|----|----|------|
| Isoform 2 of 4-hydroxyphenylpyruvate dioxygenase                                              | HPD      | NA | 99.9  | NA | 2 | NA | 2 | NA | 2  | NA | 0.0  |
| Eukaryotic translation initiation factor 3 subunit C                                          | EIF3C    | NA | 100.0 | NA | 2 | NA | 2 | NA | 2  | NA | 4.4  |
| ATP-binding cassette sub-family A member 13                                                   | ABCA13   | NA | 100.0 | NA | 2 | NA | 2 | NA | 2  | NA | 0.3  |
| Zinc finger protein 62 homolog                                                                | ZFP62    | NA | 100.0 | NA | 2 | NA | 2 | NA | 2  | NA | 0.0  |
| Patched domain-containing protein 2                                                           | PTCHD2   | NA | 100.0 | NA | 2 | NA | 2 | NA | 2  | NA | 0.0  |
| Isoform 4 of Dynein heavy chain 1, axonemal                                                   | DNAH1    | NA | 100.0 | NA | 2 | NA | 2 | NA | 2  | NA | 0.5  |
| Matrix-remodeling-associated protein 5                                                        | MXRA5    | NA | 100.0 | NA | 2 | NA | 2 | NA | 2  | NA | 0.0  |
| Isoform 2 of Protein virilizer homolog                                                        | KIAA1429 | NA | 100.0 | NA | 2 | NA | 2 | NA | 2  | NA | 0.0  |
| Isoform 3 of Calmodulin-regulated spectrin-associated protein 1                               | CAMSAP1  | NA | 100.0 | NA | 2 | NA | 2 | NA | 2  | NA | 1.7  |
| Collagen alpha-2(XI) chain                                                                    | COL11A2  | NA | 100.0 | NA | 3 | NA | 3 | NA | 4  | NA | 3.5  |
| Protein SOGA3                                                                                 | SOGA3    | NA | 100.0 | NA | 2 | NA | 2 | NA | 2  | NA | 3.8  |
| Kinesin-like protein KIF27                                                                    | KIF27    | NA | 100.0 | NA | 2 | NA | 2 | NA | 2  | NA | 1.3  |
| Anoctamin-10                                                                                  | ANO10    | NA | 100.0 | NA | 2 | NA | 2 | NA | 2  | NA | 0.0  |
| Ubiquitin                                                                                     | UBB      | NA | 100.0 | NA | 3 | NA | 5 | NA | 11 | NA | 22.2 |
| Cyclin-dependent kinase-like 2                                                                | CDKL2    | NA | 100.0 | NA | 2 | NA | 2 | NA | 3  | NA | 4.2  |
| E3 ubiquitin-protein ligase MIB1                                                              | MIB1     | NA | 100.0 | NA | 3 | NA | 3 | NA | 3  | NA | 4.7  |
| Metalloproteinase inhibitor 1                                                                 | TIMP1    | NA | 100.0 | NA | 2 | NA | 2 | NA | 2  | NA | 13.5 |
| Tyrosine-protein kinase ITK/TSK                                                               | ITK      | NA | 99.9  | NA | 2 | NA | 2 | NA | 2  | NA | 0.0  |
| Uncharacterized protein KIAA0355                                                              | KIAA0355 | NA | 100.0 | NA | 2 | NA | 2 | NA | 4  | NA | 0.0  |
| Protein furry homolog-like                                                                    | FRYL     | NA | 100.0 | NA | 3 | NA | 3 | NA | 7  | NA | 0.0  |
| Follistatin-related protein 4                                                                 | FSTL4    | NA | 100.0 | NA | 2 | NA | 2 | NA | 4  | NA | 0.0  |
| SWI/SNF-related matrix-associated actin-dependent regulator of chromatin subfamily A member 5 | SMARCA5  | NA | 100.0 | NA | 2 | NA | 2 | NA | 2  | NA | 0.0  |



|                                                                      |          |    |       |    |   |    |   |    |   |    |      |
|----------------------------------------------------------------------|----------|----|-------|----|---|----|---|----|---|----|------|
| Isoform 3 of Disks large-associated protein 5                        | DLGAP5   | NA | 100.0 | NA | 2 | NA | 2 | NA | 3 | NA | 2.7  |
| Isoform 3 of Protein FAM161A                                         | FAM161A  | NA | 100.0 | NA | 2 | NA | 2 | NA | 2 | NA | 3.1  |
| Fumarylacetoacetase                                                  | FAH      | NA | 100.0 | NA | 3 | NA | 3 | NA | 3 | NA | 8.6  |
| Isoform 2 of Glioma tumor suppressor candidate region gene 1 protein | GLTSCR1  | NA | 100.0 | NA | 2 | NA | 2 | NA | 2 | NA | 2.7  |
| Vigilin (Fragment)                                                   | HDLBP    | NA | 100.0 | NA | 2 | NA | 2 | NA | 2 | NA | 1.9  |
| Isoform 2 of Ras-GEF domain-containing family member 1A              | RASGEF1A | NA | 100.0 | NA | 2 | NA | 2 | NA | 3 | NA | 3.5  |
| BAG family molecular chaperone regulator 3 (Fragment)                | BAG3     | NA | 100.0 | NA | 2 | NA | 2 | NA | 2 | NA | 9.5  |
| Ankyrin repeat domain-containing protein 36A                         | ANKRD36  | NA | 100.0 | NA | 2 | NA | 2 | NA | 2 | NA | 1.8  |
| Protein S100-A11                                                     | S100A11  | NA | 100.0 | NA | 2 | NA | 2 | NA | 2 | NA | 23.8 |
| Protein bassoon                                                      | BSN      | NA | 100.0 | NA | 2 | NA | 2 | NA | 2 | NA | 0.5  |

**Table S4.** List of differentially expressed proteins (DEPs) obtained from the TMT quantitative analysis of patients without diabetes

| Gene            | Protein description                      | S/N  | P value | S/M  | P value | M/N  | P value |
|-----------------|------------------------------------------|------|---------|------|---------|------|---------|
| <i>APOE</i>     | Apolipoprotein E                         | 1.41 | 0.100   | 0.81 | 0.152   | 1.66 | 0.038   |
| <i>IGHM</i>     | Isoform 2 of Ig mu chain C region        | 1.32 | 0.091   | 0.82 | 0.058   | 1.61 | 0.023   |
| <i>LGALS3BP</i> | Galectin-3-binding protein               | 1.66 | 0.002   | 0.99 | 0.490   | 1.66 | 0.001   |
| <i>TF</i>       | Serotransferrin                          | 1.90 | 0.025   | 1.10 | 0.217   | 1.96 | 0.028   |
| <i>PZP</i>      | Pregnancy zone protein                   | 0.50 | 0.000   | 0.51 | 0.001   | 0.98 | 0.381   |
| <i>S100A9</i>   | Protein S100-A9                          | 0.38 | 0.006   | 0.57 | 0.017   | 0.65 | 0.038   |
| <i>CRP</i>      | C-reactive protein                       | 0.64 | 0.003   | 0.71 | 0.114   | 0.78 | 0.186   |
| <i>KNG1</i>     | Isoform LMW of Kininogen-1               | 1.51 | 0.043   | 0.84 | 0.034   | 1.78 | 0.028   |
| <i>DNAH2</i>    | Dynein heavy chain 2, axonemal           | 0.54 | 0.230   | 1.03 | 0.441   | 0.57 | 0.014   |
| <i>C4A</i>      | Complement C4-A                          | 0.48 | 0.026   | 1.13 | 0.418   | 0.51 | 0.034   |
| <i>GAPDH</i>    | Glyceraldehyde-3-phosphate dehydrogenase | 0.67 | 0.009   | 0.64 | 0.011   | 0.99 | 0.447   |
| <i>VTDB</i>     | Vitamin D-binding protein                | 1.95 | 0.015   | 1.84 | 0.009   | 1.06 | 0.479   |
| <i>MYOM2</i>    | Myomesin-2                               | 0.89 | 0.372   | 1.55 | 0.046   | 0.75 | 0.122   |
| <i>S100A8</i>   | Protein S100-A8                          | 0.32 | 0.038   | 0.62 | 0.109   | 0.51 | 0.080   |
| <i>BPIFA1</i>   | BPI fold-containing family A member 1    | 0.40 | 0.000   | 0.87 | 0.343   | 0.58 | 0.147   |
| <i>CFHR2</i>    | Complement factor H-related protein 2    | 1.53 | 0.039   | 1.14 | 0.221   | 1.34 | 0.080   |
| <i>FSIP2</i>    | Fibrous sheath-interacting protein 2     | 2.86 | 0.011   | 1.10 | 0.376   | 2.60 | 0.010   |
| <i>KIAA1551</i> | Uncharacterized protein KIAA1551         | 0.55 | 0.171   | 1.13 | 0.400   | 0.50 | 0.008   |

|                |                                                                |      |       |      |       |      |       |
|----------------|----------------------------------------------------------------|------|-------|------|-------|------|-------|
| <i>MPO</i>     | Isoform H7 of Myeloperoxidase                                  | 0.55 | 0.024 | 0.71 | 0.187 | 0.78 | 0.246 |
| <i>SF3A1</i>   | Splicing factor 3A subunit 1                                   | 4.29 | 0.000 | 0.89 | 0.363 | 4.81 | 0.000 |
| <i>SYNJ1</i>   | Synaptojanin-1                                                 | 1.77 | 0.119 | 0.79 | 0.201 | 2.25 | 0.021 |
| <i>TPM4</i>    | Isoform 2 of Tropomyosin alpha-4 chain                         | 1.43 | 0.102 | 0.61 | 0.058 | 2.36 | 0.004 |
| <i>UACA</i>    | Uveal autoantigen with coiled-coil domains and ankyrin repeats | 1.38 | 0.010 | 0.86 | 0.151 | 1.58 | 0.001 |
| <i>BAX</i>     | Isoform Beta of Apoptosis regulator BAX                        | 0.75 | 0.135 | 1.15 | 0.280 | 0.65 | 0.049 |
| <i>CEP250</i>  | Centrosome-associated protein CEP250                           | 0.48 | 0.003 | 0.97 | 0.481 | 0.51 | 0.005 |
| <i>CMIP</i>    | C-Maf-inducing protein                                         | 0.97 | 0.401 | 1.41 | 0.048 | 0.65 | 0.004 |
| <i>DNAH8</i>   | Dynein heavy chain 8, axonemal                                 | 0.73 | 0.109 | 1.24 | 0.192 | 0.59 | 0.019 |
| <i>FAM134B</i> | Isoform 2 of Protein FAM134B                                   | 1.58 | 0.050 | 0.98 | 0.498 | 1.61 | 0.047 |
| <i>FLNA</i>    | Filamin-A                                                      | 1.37 | 0.122 | 0.64 | 0.025 | 1.94 | 0.002 |
| <i>GDI2</i>    | Rab GDP dissociation inhibitor beta                            | 0.56 | 0.187 | 2.45 | 0.153 | 0.23 | 0.045 |
| <i>ICAM2</i>   | Intercellular adhesion molecule 2                              | 0.77 | 0.163 | 1.17 | 0.240 | 0.66 | 0.043 |
| <i>MAP4</i>    | Microtubule-associated protein                                 | 1.15 | 0.252 | 0.66 | 0.021 | 1.67 | 0.003 |
| <i>MMP9</i>    | Matrix metalloproteinase-9                                     | 0.37 | 0.000 | 0.71 | 0.055 | 0.53 | 0.038 |
| <i>PARP4</i>   | Poly [ADP-ribose] polymerase 4                                 | 0.39 | 0.127 | 1.96 | 0.001 | 0.21 | 0.041 |
| <i>RAB3A</i>   | Ras-related protein Rab-3A                                     | 0.63 | 0.043 | 1.29 | 0.156 | 0.49 | 0.003 |
| <i>SYNE1</i>   | Isoform 4 of Nesprin-1                                         | 0.49 | 0.001 | 1.12 | 0.274 | 0.43 | 0.000 |
| <i>URB2</i>    | Unhealthy ribosome biogenesis protein 2 homolog                | 0.49 | 0.003 | 0.77 | 0.202 | 0.64 | 0.111 |
| <i>ALB</i>     | Serum albumin                                                  | 1.62 | 0.056 | 1.16 | 0.153 | 1.43 | 0.064 |
| <i>HP</i>      | Haptoglobin                                                    | 1.68 | 0.066 | 1.33 | 0.137 | 1.27 | 0.226 |

|               |                                                                  |      |       |      |       |      |       |
|---------------|------------------------------------------------------------------|------|-------|------|-------|------|-------|
| <i>APP</i>    | Isoform APP639 of Amyloid beta A4 protein                        | 1.18 | 0.391 | 0.95 | 0.476 | 1.24 | 0.362 |
| <i>LYVE1</i>  | Lymphatic vessel endothelial hyaluronic acid receptor 1          | 0.62 | 0.056 | 0.94 | 0.364 | 0.68 | 0.110 |
| <i>APC</i>    | Isoform Short of Adenomatous polyposis coli protein              | 1.15 | 0.229 | 0.93 | 0.370 | 1.28 | 0.077 |
| <i>ENPP2</i>  | Ectonucleotide pyrophosphatase/phosphodiesterase family member 2 | 0.93 | 0.345 | 1.11 | 0.275 | 0.84 | 0.162 |
| <i>SYNE2</i>  | Isoform 2 of Nesprin-2                                           | 1.00 | 0.490 | 1.04 | 0.390 | 0.98 | 0.433 |
| <i>UTRN</i>   | Utrophin                                                         | 0.63 | 0.188 | 1.00 | 0.474 | 0.61 | 0.166 |
| <i>ICA1L</i>  | Islet cell autoantigen 1-like protein                            | 0.55 | 0.254 | 0.64 | 0.239 | 0.65 | 0.204 |
| <i>KANK1</i>  | KN motif and ankyrin repeat domain-containing protein 1          | 1.09 | 0.459 | 3.82 | 0.053 | 0.29 | 0.068 |
| <i>KTN1</i>   | Isoform 3 of Kinectin                                            | 1.23 | 0.357 | 0.96 | 0.482 | 1.29 | 0.335 |
| <i>NCAM1</i>  | Isoform 2 of Neural cell adhesion molecule 1                     | 1.02 | 0.490 | 0.97 | 0.474 | 1.06 | 0.455 |
| <i>NCOR1</i>  | Isoform 2 of Nuclear receptor corepressor 1                      | 1.14 | 0.335 | 0.97 | 0.479 | 1.17 | 0.305 |
| <i>POLR1B</i> | DNA-directed RNA polymerase I subunit RPA2                       | 1.35 | 0.146 | 0.96 | 0.453 | 1.20 | 0.241 |
| <i>SOGA1</i>  | Isoform 2 of Protein SOGA1                                       | 0.78 | 0.296 | 0.78 | 0.197 | 1.00 | 0.473 |

S/N, severe coronary artery stenosis Vs. normal coronary artery group; S/M, severe coronary artery stenosis Vs. mild-to-moderate coronary artery stenosis group; M/N, mild-to-moderate coronary artery stenosis Vs. normal coronary artery group.

**Table S5.** List of differentially expressed proteins (DEPs) obtained from the TMT quantitative analysis of patients with diabetes

| Gene         | Protein description                       | S/N   | P value | S/M  | P value | M/N  | P value |
|--------------|-------------------------------------------|-------|---------|------|---------|------|---------|
| <i>A2M</i>   | Alpha-2-macroglobulin                     | 1.51  | 0.069   | 1.74 | 0.036   | 0.86 | 0.444   |
| <i>FGA</i>   | Fibrinogen alpha chain                    | 5.89  | 0.041   | 1.33 | 0.153   | 4.67 | 0.045   |
| <i>FGB</i>   | Fibrinogen beta chain                     | 6.08  | 0.022   | 1.33 | 0.070   | 4.77 | 0.025   |
| <i>FGG</i>   | Isoform Gamma-A of Fibrinogen gamma chain | 10.99 | 0.009   | 1.43 | 0.025   | 8.19 | 0.014   |
| <i>ACTB</i>  | Actin, cytoplasmic 1                      | 1.42  | 0.047   | 1.61 | 0.004   | 0.86 | 0.418   |
| <i>CA1</i>   | Carbonic anhydrase 1                      | 0.64  | 0.023   | 0.62 | 0.013   | 1.11 | 0.090   |
| <i>LTF</i>   | Kaliocin-1 (Fragment)                     | 0.55  | 0.011   | 1.37 | 0.145   | 0.39 | 0.017   |
| <i>DSP</i>   | Desmoplakin                               | 1.54  | 0.049   | 1.88 | 0.038   | 0.76 | 0.195   |
| <i>FBLN1</i> | Fibulin-1                                 | 1.66  | 0.036   | 0.89 | 0.154   | 1.95 | 0.030   |
| <i>LBP</i>   | Lipopolysaccharide-binding protein        | 0.80  | 0.274   | 0.41 | 0.012   | 1.96 | 0.012   |
| <i>APOC2</i> | Apolipoprotein C-II                       | 1.06  | 0.377   | 0.85 | 0.233   | 1.52 | 0.014   |
| <i>PFN1</i>  | Profilin-1                                | 1.36  | 0.041   | 1.52 | 0.022   | 0.92 | 0.473   |
| <i>PPBP</i>  | Platelet basic protein                    | 0.59  | 0.016   | 1.21 | 0.162   | 0.55 | 0.067   |
| <i>PZP</i>   | Pregnancy zone protein                    | 0.48  | 0.049   | 0.70 | 0.109   | 0.59 | 0.042   |
| <i>SAA1</i>  | Serum amyloid A-1 protein                 | 1.32  | 0.189   | 0.15 | 0.052   | 9.01 | 0.048   |
| <i>ANPEP</i> | Aminopeptidase N                          | 0.69  | 0.076   | 1.17 | 0.264   | 0.62 | 0.031   |
| <i>GP5</i>   | Platelet glycoprotein V                   | 0.42  | 0.038   | 1.00 | 0.463   | 0.46 | 0.018   |
| <i>HBB</i>   | Hemoglobin subunit beta                   | 0.94  | 0.439   | 0.73 | 0.068   | 1.64 | 0.014   |
| <i>MBL2</i>  | Mannose-binding protein C                 | 0.63  | 0.031   | 0.96 | 0.320   | 0.66 | 0.016   |

|                 |                                                                  |      |       |      |       |       |       |
|-----------------|------------------------------------------------------------------|------|-------|------|-------|-------|-------|
| <i>S100A9</i>   | Protein S100-A9                                                  | 1.38 | 0.015 | 2.63 | 0.019 | 0.50  | 0.019 |
| <i>SHBG</i>     | Sex hormone-binding globulin                                     | 0.61 | 0.073 | 1.11 | 0.340 | 0.53  | 0.022 |
| <i>CRP</i>      | C-reactive protein                                               | 1.03 | 0.169 | 0.10 | 0.000 | 11.07 | 0.000 |
| <i>LYVE1</i>    | Lymphatic vessel endothelial hyaluronic acid receptor 1          | 0.55 | 0.001 | 0.65 | 0.074 | 0.96  | 0.309 |
| <i>PLTP</i>     | Phospholipid transfer protein                                    | 0.47 | 0.091 | 0.81 | 0.242 | 0.57  | 0.042 |
| <i>DCD</i>      | Dermcidin                                                        | 1.31 | 0.133 | 1.50 | 0.036 | 0.89  | 0.473 |
| <i>C4A</i>      | Complement C4-A                                                  | 0.51 | 0.014 | 0.74 | 0.219 | 0.77  | 0.201 |
| <i>DMXL2</i>    | Isoform 3 of DmX-like protein 2                                  | 0.66 | 0.025 | 1.03 | 0.495 | 0.65  | 0.024 |
| <i>MYOM2</i>    | Myomesin-2                                                       | 0.67 | 0.128 | 1.14 | 0.362 | 0.59  | 0.036 |
| <i>PF4</i>      | Platelet factor 4                                                | 0.48 | 0.037 | 1.09 | 0.347 | 0.49  | 0.038 |
| <i>PI16</i>     | Peptidase inhibitor 16                                           | 0.68 | 0.069 | 0.76 | 0.036 | 0.89  | 0.490 |
| <i>S100A8</i>   | Protein S100-A8                                                  | 1.12 | 0.232 | 2.45 | 0.032 | 0.47  | 0.110 |
| <i>CD5L</i>     | CD5 antigen-like                                                 | 1.99 | 0.031 | 1.28 | 0.177 | 1.57  | 0.047 |
| <i>CEP290</i>   | Centrosomal protein of 290 kDa                                   | 0.86 | 0.417 | 1.30 | 0.210 | 0.54  | 0.031 |
| <i>KIAA1551</i> | Uncharacterized protein KIAA1551                                 | 4.01 | 0.186 | 0.76 | 0.289 | 13.62 | 0.000 |
| <i>SF3A1</i>    | Splicing factor 3A subunit 1                                     | 2.37 | 0.009 | 2.11 | 0.007 | 1.11  | 0.335 |
| <i>ADAMTS9</i>  | A disintegrin and metalloproteinase with thrombospondin motifs 9 | 0.56 | 0.034 | 0.68 | 0.037 | 0.83  | 0.366 |
| <i>AKAP4</i>    | A-kinase anchor protein 4                                        | 0.89 | 0.421 | 0.84 | 0.035 | 1.08  | 0.050 |
| <i>CEP250</i>   | Centrosome-associated protein CEP250                             | 0.87 | 0.433 | 0.61 | 0.025 | 1.42  | 0.061 |
| <i>CMIP</i>     | C-Maf-inducing protein                                           | 0.72 | 0.121 | 1.37 | 0.092 | 0.51  | 0.001 |
| <i>DEFA3</i>    | Neutrophil defensin 3                                            | 0.78 | 0.320 | 1.75 | 0.005 | 0.39  | 0.003 |

|                 |                                                                           |       |       |      |       |       |       |
|-----------------|---------------------------------------------------------------------------|-------|-------|------|-------|-------|-------|
| <i>EIF2B4</i>   | Translation initiation factor eIF-2B subunit delta                        | 2.59  | 0.026 | 1.29 | 0.339 | 2.01  | 0.069 |
| <i>FLNA</i>     | Filamin-A                                                                 | 0.33  | 0.000 | 1.16 | 0.417 | 0.31  | 0.029 |
| <i>FNIP1</i>    | Folliculin-interacting protein 1                                          | 0.12  | 0.035 | 1.58 | 0.277 | 0.18  | 0.074 |
| <i>HBA1</i>     | Hemoglobin subunit alpha                                                  | 1.08  | 0.184 | 0.71 | 0.025 | 1.55  | 0.004 |
| <i>ICA1L</i>    | Islet cell autoantigen 1-like protein                                     | 14.36 | 0.001 | 1.33 | 0.088 | 10.92 | 0.002 |
| <i>ICAM2</i>    | Intercellular adhesion molecule 2                                         | 0.55  | 0.046 | 0.60 | 0.284 | 0.75  | 0.397 |
| <i>KIAA0196</i> | WASH complex subunit strumpellin                                          | 22.06 | 0.006 | 1.04 | 0.497 | 39.06 | 0.001 |
| <i>MMP9</i>     | Matrix metalloproteinase-9                                                | 0.63  | 0.150 | 1.46 | 0.134 | 0.49  | 0.037 |
| <i>NINL</i>     | Ninein-like protein                                                       | 1.78  | 0.075 | 1.82 | 0.020 | 0.99  | 0.360 |
| <i>PARP4</i>    | Poly [ADP-ribose] polymerase 4                                            | 0.52  | 0.008 | 1.27 | 0.196 | 0.45  | 0.002 |
| <i>PPFIA2</i>   | Liprin-alpha-2                                                            | 1.79  | 0.006 | 2.04 | 0.005 | 0.88  | 0.467 |
| <i>SCUBE2</i>   | Isoform 2 of Signal peptide, CUB and EGF-like domain-containing protein 2 | 0.31  | 0.022 | 1.10 | 0.409 | 0.30  | 0.021 |
| <i>SYNE1</i>    | Isoform 4 of Nesprin-1                                                    | 0.54  | 0.013 | 0.50 | 0.001 | 1.08  | 0.191 |
| <i>DOCK2</i>    | Dedicator of cytokinesis protein 2                                        | 0.29  | 0.016 | 0.51 | 0.095 | 0.56  | 0.019 |
| <i>LAMB1</i>    | Laminin subunit beta-1                                                    | 2.55  | 0.000 | 1.80 | 0.004 | 1.24  | 0.121 |
| <i>ITIH3</i>    | Isoform 2 of Inter-alpha-trypsin inhibitor heavy chain H3                 | 1.14  | 0.028 | 1.21 | 0.144 | 0.93  | 0.392 |
| <i>APOL1</i>    | Isoform 2 of Apolipoprotein L1                                            | 1.15  | 0.232 | 0.72 | 0.034 | 1.44  | 0.016 |
| <i>LRG1</i>     | Leucine-rich alpha-2-glycoprotein                                         | 0.75  | 0.294 | 0.60 | 0.056 | 1.27  | 0.071 |
| <i>HP</i>       | Haptoglobin                                                               | 1.42  | 0.011 | 1.47 | 0.005 | 0.98  | 0.239 |
| <i>F13A1</i>    | Coagulation factor XIII A chain                                           | 1.89  | 0.055 | 1.09 | 0.404 | 1.47  | 0.060 |
| <i>GAPDH</i>    | Glyceraldehyde-3-phosphate dehydrogenase                                  | 1.14  | 0.140 | 1.26 | 0.128 | 0.92  | 0.467 |

|               |                                                                      |      |       |      |       |      |       |
|---------------|----------------------------------------------------------------------|------|-------|------|-------|------|-------|
| <i>MUC16</i>  | Mucin-16                                                             | 0.99 | 0.418 | 1.24 | 0.086 | 1.04 | 0.392 |
| <i>YWHAZ</i>  | 14-3-3 protein zeta/delta (Fragment)                                 | 1.41 | 0.010 | 1.39 | 0.166 | 1.02 | 0.240 |
| <i>JUP</i>    | Junction plakoglobin                                                 | 1.58 | 0.150 | 1.87 | 0.134 | 0.84 | 0.455 |
| <i>UACA</i>   | Uveal autoantigen with coiled-coil domains and ankyrin repeats       | 0.79 | 0.214 | 0.85 | 0.075 | 0.94 | 0.381 |
| <i>FGD5</i>   | FYVE, RhoGEF and PH domain-containing protein 5                      | 0.79 | 0.222 | 0.80 | 0.113 | 0.96 | 0.374 |
| <i>KANK1</i>  | Isoform 2 of KN motif and ankyrin repeat domain-containing protein 1 | 0.79 | 0.430 | 1.94 | 0.233 | 0.41 | 0.182 |
| <i>MYCBP2</i> | Probable E3 ubiquitin-protein ligase MYCBP2                          | 0.86 | 0.418 | 0.82 | 0.306 | 1.04 | 0.311 |
| <i>NCAPD2</i> | Condensin complex subunit 1                                          | 0.86 | 0.416 | 0.94 | 0.364 | 0.74 | 0.290 |

S/N, severe coronary artery stenosis Vs. normal coronary artery group; S/M, severe coronary artery stenosis Vs. mild-to-moderate coronary artery stenosis group; M/N, mild-to-moderate coronary artery stenosis Vs. normal coronary artery group.



**Table S6.** Transition list for the selected reaction monitoring analysis (SRM) in verification cohort

| Gene           | Peptide      | Type  | Precursor ion | MS1 Res | Product ion | MS2 Res | Fragmentor | Collison energy | Dwell time |
|----------------|--------------|-------|---------------|---------|-------------|---------|------------|-----------------|------------|
| <i>APOC2</i>   | TYLPAVDEK    | light | 518.6         | Unit    | 771.9       | Unit    | 130        | 17.1            | 20         |
| <i>APOC2</i>   | TYLPAVDEK    | light | 518.6         | Unit    | 658.7       | Unit    | 130        | 17.1            | 20         |
| <i>APOC2</i>   | TYLPAVDEK    | light | 518.6         | Unit    | 561.6       | Unit    | 130        | 17.1            | 20         |
| <i>ARL6IP4</i> | GDGEVLEEIVTK | light | 645.2         | Unit    | 931.1       | Unit    | 130        | 21              | 20         |
| <i>ARL6IP4</i> | GDGEVLEEIVTK | light | 645.2         | Unit    | 832.0       | Unit    | 130        | 21              | 20         |
| <i>ARL6IP4</i> | GDGEVLEEIVTK | light | 645.2         | Unit    | 718.8       | Unit    | 130        | 21              | 20         |
| <i>C18orf8</i> | LEPIVNLLPDK  | light | 626.3         | Unit    | 1009.2      | Unit    | 130        | 20.4            | 20         |
| <i>C18orf8</i> | LEPIVNLLPDK  | light | 626.3         | Unit    | 359.4       | Unit    | 130        | 20.4            | 20         |
| <i>C18orf8</i> | LEPIVNLLPDK  | light | 626.3         | Unit    | 505.1       | Unit    | 130        | 20.4            | 20         |
| <i>C18orf8</i> | ASLPVIATVFDK | light | 631.3         | Unit    | 793.9       | Unit    | 130        | 20.6            | 20         |
| <i>C18orf8</i> | ASLPVIATVFDK | light | 631.3         | Unit    | 680.8       | Unit    | 130        | 20.6            | 20         |
| <i>C18orf8</i> | ASLPVIATVFDK | light | 631.3         | Unit    | 495.6       | Unit    | 130        | 20.6            | 20         |
| <i>C4A</i>     | VDFTLSSER    | light | 527.6         | Unit    | 839.9       | Unit    | 130        | 17.4            | 20         |
| <i>C4A</i>     | VDFTLSSER    | light | 527.6         | Unit    | 692.7       | Unit    | 130        | 17.4            | 20         |
| <i>C4A</i>     | VDFTLSSER    | light | 527.6         | Unit    | 591.6       | Unit    | 130        | 17.4            | 20         |
| <i>C4A</i>     | DFALLSLQVPLK | light | 672.8         | Unit    | 898.1       | Unit    | 130        | 21.9            | 20         |
| <i>C4A</i>     | DFALLSLQVPLK | light | 672.8         | Unit    | 785.0       | Unit    | 130        | 21.9            | 20         |
| <i>C4A</i>     | DFALLSLQVPLK | light | 672.8         | Unit    | 697.9       | Unit    | 130        | 21.9            | 20         |
| <i>CA1</i>     | GGPFSDSYR    | light | 493.5         | Unit    | 774.8       | Unit    | 130        | 16.3            | 20         |

|              |                  |       |       |      |        |      |     |      |    |
|--------------|------------------|-------|-------|------|--------|------|-----|------|----|
| <i>CA1</i>   | GGPFSDSYR        | light | 493.5 | Unit | 627.6  | Unit | 130 | 16.3 | 20 |
| <i>CA1</i>   | GGPFSDSYR        | light | 493.5 | Unit | 540.5  | Unit | 130 | 16.3 | 20 |
| <i>CUL5</i>  | VSEDLNQAQFK      | light | 576.1 | Unit | 965.0  | Unit | 130 | 18.9 | 20 |
| <i>CUL5</i>  | VSEDLNQAQFK      | light | 576.1 | Unit | 835.9  | Unit | 130 | 18.9 | 20 |
| <i>CUL5</i>  | VSEDLNQAQFK      | light | 576.1 | Unit | 607.7  | Unit | 130 | 18.9 | 20 |
| <i>DCD</i>   | ENAGEDPGLAR      | light | 565.1 | Unit | 814.9  | Unit | 130 | 18.5 | 20 |
| <i>DCD</i>   | ENAGEDPGLAR      | light | 565.1 | Unit | 628.7  | Unit | 130 | 18.5 | 20 |
| <i>DCD</i>   | ENAGEDPGLAR      | light | 565.1 | Unit | 513.6  | Unit | 130 | 18.5 | 20 |
| <i>DCD</i>   | DAVEDLESVGK      | light | 581.6 | Unit | 876.9  | Unit | 130 | 19   | 20 |
| <i>DCD</i>   | DAVEDLESVGK      | light | 581.6 | Unit | 747.8  | Unit | 130 | 19   | 20 |
| <i>DCD</i>   | DAVEDLESVGK      | light | 581.6 | Unit | 632.7  | Unit | 130 | 19   | 20 |
| <i>DOCK2</i> | DILLPVITK        | light | 506.6 | Unit | 784.0  | Unit | 130 | 16.7 | 20 |
| <i>DOCK2</i> | DILLPVITK        | light | 506.6 | Unit | 670.9  | Unit | 130 | 16.7 | 20 |
| <i>DOCK2</i> | DILLPVITK        | light | 506.6 | Unit | 557.7  | Unit | 130 | 16.7 | 20 |
| <i>FGA</i>   | GLIDEVNQDFTNR    | light | 761.3 | Unit | 1238.2 | Unit | 130 | 24.6 | 20 |
| <i>FGA</i>   | GLIDEVNQDFTNR    | light | 761.3 | Unit | 994.0  | Unit | 130 | 24.6 | 20 |
| <i>FGA</i>   | GLIDEVNQDFTNR    | light | 761.3 | Unit | 894.9  | Unit | 130 | 24.6 | 20 |
| <i>FGA</i>   | NSLFEYQK         | light | 515.1 | Unit | 827.9  | Unit | 130 | 17   | 20 |
| <i>FGA</i>   | NSLFEYQK         | light | 515.1 | Unit | 714.8  | Unit | 130 | 17   | 20 |
| <i>FGA</i>   | NSLFEYQK         | light | 515.1 | Unit | 567.6  | Unit | 130 | 17   | 20 |
| <i>FGA</i>   | GGSTSYGTGSETESPR | light | 787.3 | Unit | 1184.2 | Unit | 130 | 25.4 | 20 |
| <i>FGA</i>   | GGSTSYGTGSETESPR | light | 787.3 | Unit | 1021.0 | Unit | 130 | 25.4 | 20 |

|              |                  |       |       |      |        |      |     |      |    |
|--------------|------------------|-------|-------|------|--------|------|-----|------|----|
| <i>FGA</i>   | GGSTSYGTGSETESPR | light | 787.3 | Unit | 862.9  | Unit | 130 | 25.4 | 20 |
| <i>FGB</i>   | DNENVVNEYSSELEK  | light | 590.6 | Unit | 855.9  | Unit | 130 | 16.5 | 20 |
| <i>FGB</i>   | DNENVVNEYSSELEK  | light | 590.6 | Unit | 692.7  | Unit | 130 | 16.5 | 20 |
| <i>FGB</i>   | DNENVVNEYSSELEK  | light | 590.6 | Unit | 605.7  | Unit | 130 | 16.5 | 20 |
| <i>FGB</i>   | YQISVNK          | light | 426.5 | Unit | 688.8  | Unit | 130 | 14.2 | 20 |
| <i>FGB</i>   | YQISVNK          | light | 426.5 | Unit | 560.7  | Unit | 130 | 14.2 | 20 |
| <i>FGB</i>   | YQISVNK          | light | 426.5 | Unit | 447.5  | Unit | 130 | 14.2 | 20 |
| <i>FGG</i>   | YLQEIYNSNNQK     | light | 505.5 | Unit | 867.9  | Unit | 130 | 13.4 | 20 |
| <i>FGB</i>   | YLQEIYNSNNQK     | light | 505.5 | Unit | 704.7  | Unit | 130 | 13.4 | 20 |
| <i>FGB</i>   | YLQEIYNSNNQK     | light | 505.5 | Unit | 590.6  | Unit | 130 | 13.4 | 20 |
| <i>GAPDH</i> | GALQNIIPASTGAAK  | light | 471.5 | Unit | 702.8  | Unit | 130 | 12.2 | 20 |
| <i>GAPDH</i> | GALQNIIPASTGAAK  | light | 471.5 | Unit | 534.6  | Unit | 130 | 12.2 | 20 |
| <i>GAPDH</i> | GALQNIIPASTGAAK  | light | 471.5 | Unit | 351.9  | Unit | 130 | 12.2 | 20 |
| <i>VTDB</i>  | VLEPTLK          | light | 400.5 | Unit | 700.8  | Unit | 130 | 13.4 | 20 |
| <i>VTDB</i>  | VLEPTLK          | light | 400.5 | Unit | 587.7  | Unit | 130 | 13.4 | 20 |
| <i>VTDB</i>  | VLEPTLK          | light | 400.5 | Unit | 458.6  | Unit | 130 | 13.4 | 20 |
| <i>HBB</i>   | EFTPPVQAAYQK     | light | 690.3 | Unit | 1002.2 | Unit | 130 | 22.4 | 20 |
| <i>HBB</i>   | EFTPPVQAAYQK     | light | 690.3 | Unit | 905.0  | Unit | 130 | 22.4 | 20 |
| <i>HBB</i>   | EFTPPVQAAYQK     | light | 690.3 | Unit | 501.6  | Unit | 130 | 22.4 | 20 |
| <i>HEG1</i>  | SIAGISYGQVR      | light | 576.2 | Unit | 951.1  | Unit | 130 | 18.9 | 20 |
| <i>HEG1</i>  | SIAGISYGQVR      | light | 576.2 | Unit | 709.8  | Unit | 130 | 18.9 | 20 |
| <i>HEG1</i>  | SIAGISYGQVR      | light | 576.2 | Unit | 622.7  | Unit | 130 | 18.9 | 20 |
| <i>HP</i>    | TEGDGVYTLNNEK    | light | 720.8 | Unit | 1210.3 | Unit | 130 | 23.3 | 20 |
| <i>HP</i>    | TEGDGVYTLNNEK    | light | 720.8 | Unit | 1038.1 | Unit | 130 | 23.3 | 20 |

|              |                 |       |       |      |        |      |     |      |    |
|--------------|-----------------|-------|-------|------|--------|------|-----|------|----|
| <i>HP</i>    | TEGDGVYTLNNEK   | light | 720.8 | Unit | 882.0  | Unit | 130 | 23.3 | 20 |
| <i>IGHG3</i> | ALPAPIEK        | light | 420.0 | Unit | 654.8  | Unit | 130 | 14   | 20 |
| <i>IGHG3</i> | ALPAPIEK        | light | 420.0 | Unit | 557.7  | Unit | 130 | 14   | 20 |
| <i>IGHG3</i> | ALPAPIEK        | light | 420.0 | Unit | 486.6  | Unit | 130 | 14   | 20 |
| <i>IGHG3</i> | EPQVYTLPPSR     | light | 644.2 | Unit | 834.0  | Unit | 130 | 21   | 20 |
| <i>IGHG3</i> | EPQVYTLPPSR     | light | 644.2 | Unit | 670.8  | Unit | 130 | 21   | 20 |
| <i>IGHG3</i> | EPQVYTLPPSR     | light | 644.2 | Unit | 456.5  | Unit | 130 | 21   | 20 |
| <i>LAMB1</i> | ISGVIGPYR       | light | 481.6 | Unit | 761.9  | Unit | 130 | 15.9 | 20 |
| <i>LAMB1</i> | ISGVIGPYR       | light | 481.6 | Unit | 605.7  | Unit | 130 | 15.9 | 20 |
| <i>LAMB1</i> | ISGVIGPYR       | light | 481.6 | Unit | 492.6  | Unit | 130 | 15.9 | 20 |
| <i>LAMB1</i> | DILAQSPAAEPLK   | light | 677.3 | Unit | 941.1  | Unit | 130 | 22   | 20 |
| <i>LAMB1</i> | DILAQSPAAEPLK   | light | 677.3 | Unit | 812.9  | Unit | 130 | 22   | 20 |
| <i>LAMB1</i> | DILAQSPAAEPLK   | light | 677.3 | Unit | 725.9  | Unit | 130 | 22   | 20 |
| <i>LBP</i>   | ITLPDFTGDLR     | light | 624.7 | Unit | 921.0  | Unit | 130 | 20.4 | 20 |
| <i>LBP</i>   | ITLPDFTGDLR     | light | 624.7 | Unit | 823.9  | Unit | 130 | 20.4 | 20 |
| <i>LBP</i>   | ITLPDFTGDLR     | light | 624.7 | Unit | 708.8  | Unit | 130 | 20.4 | 20 |
| <i>LYZ</i>   | STDYGIFQINSR    | light | 701.3 | Unit | 1098.2 | Unit | 130 | 22.7 | 20 |
| <i>LYZ</i>   | STDYGIFQINSR    | light | 701.3 | Unit | 935.1  | Unit | 130 | 22.7 | 20 |
| <i>LYZ</i>   | STDYGIFQINSR    | light | 701.3 | Unit | 764.9  | Unit | 130 | 22.7 | 20 |
| <i>MED23</i> | ALILTLAR        | light | 436.1 | Unit | 686.9  | Unit | 130 | 14.5 | 20 |
| <i>MED23</i> | ALILTLAR        | light | 436.1 | Unit | 573.7  | Unit | 130 | 14.5 | 20 |
| <i>MED23</i> | ALILTLAR        | light | 436.1 | Unit | 460.6  | Unit | 130 | 14.5 | 20 |
| <i>NRP1</i>  | IAPPPVSSGPFLFIK | light | 557.3 | Unit | 822.0  | Unit | 130 | 15.3 | 20 |
| <i>NRP1</i>  | IAPPPVSSGPFLFIK | light | 557.3 | Unit | 765.0  | Unit | 130 | 15.3 | 20 |

|                 |                         |       |       |      |       |      |     |      |    |
|-----------------|-------------------------|-------|-------|------|-------|------|-----|------|----|
| <i>NRP1</i>     | IAPPPVVSSGPFLFIK        | light | 557.3 | Unit | 743.4 | Unit | 130 | 15.3 | 20 |
| <i>PARP4</i>    | NGETAQLQK               | light | 559.6 | Unit | 817.9 | Unit | 130 | 18.3 | 20 |
| <i>PARP4</i>    | NGETAQLQK               | light | 559.6 | Unit | 716.8 | Unit | 130 | 18.3 | 20 |
| <i>PARP4</i>    | NGETAQLQK               | light | 559.6 | Unit | 645.7 | Unit | 130 | 18.3 | 20 |
| <i>PLEKHA6</i>  | ANGLPAGPEPASEPGSPYPEGPR | light | 750.1 | Unit | 815.9 | Unit | 130 | 22.2 | 20 |
| <i>PLEKHA6</i>  | ANGLPAGPEPASEPGSPYPEGPR | light | 750.1 | Unit | 947.0 | Unit | 130 | 22.2 | 20 |
| <i>PLEKHA6</i>  | ANGLPAGPEPASEPGSPYPEGPR | light | 750.1 | Unit | 529.1 | Unit | 130 | 22.2 | 20 |
| <i>CXCL7</i>    | NIQSLEVIGK              | light | 551.1 | Unit | 874.0 | Unit | 130 | 18.1 | 20 |
| <i>CXCL7</i>    | NIQSLEVIGK              | light | 551.1 | Unit | 745.9 | Unit | 130 | 18.1 | 20 |
| <i>CXCL7</i>    | NIQSLEVIGK              | light | 551.1 | Unit | 658.8 | Unit | 130 | 18.1 | 20 |
| <i>SERPINA1</i> | ITPNLAEFASLYR           | light | 548.3 | Unit | 756.9 | Unit | 130 | 14.9 | 20 |
| <i>SERPINA1</i> | ITPNLAEFASLYR           | light | 548.3 | Unit | 685.8 | Unit | 130 | 14.9 | 20 |
| <i>SERPINA1</i> | ITPNLAEFASLYR           | light | 548.3 | Unit | 714.8 | Unit | 130 | 14.9 | 20 |
| <i>TF</i>       | EGYYGYTGAFR             | light | 642.7 | Unit | 935.0 | Unit | 130 | 20.9 | 20 |
| <i>TF</i>       | EGYYGYTGAFR             | light | 642.7 | Unit | 771.8 | Unit | 130 | 20.9 | 20 |
| <i>TF</i>       | EGYYGYTGAFR             | light | 642.7 | Unit | 714.8 | Unit | 130 | 20.9 | 20 |
| <i>TF</i>       | YLGEEYVK                | light | 501.1 | Unit | 837.9 | Unit | 130 | 16.5 | 20 |
| <i>TF</i>       | YLGEEYVK                | light | 501.1 | Unit | 724.8 | Unit | 130 | 16.5 | 20 |
| <i>TF</i>       | YLGEEYVK                | light | 501.1 | Unit | 538.6 | Unit | 130 | 16.5 | 20 |

**Table S7.** Information list of transition and elute time for the selected reaction monitoring analysis (SRM) in validation cohort

| Gene         | Peptide   | Light<br>/Heavy | Precursor<br>ion | MS1<br>Res | Product<br>ion | MS2<br>Res | Fragmentor | Collison<br>energy | Elute<br>time<br>(minute) | Delta<br>Ret<br>time* |
|--------------|-----------|-----------------|------------------|------------|----------------|------------|------------|--------------------|---------------------------|-----------------------|
| <i>APOC2</i> | TYLPAVDEK | Light           | 518.3            | Unit       | 771.4          | Unit       | 380        | 17.1               | 19.4                      | 2                     |
| <i>APOC2</i> | TYLPAVDEK | Light           | 518.3            | Unit       | 658.3          | Unit       | 380        | 17.1               | 19.4                      | 2                     |
| <i>APOC2</i> | TYLPAVDEK | Light           | 518.3            | Unit       | 561.3          | Unit       | 380        | 17.1               | 19.4                      | 2                     |
| <i>APOC2</i> | TYLPAVDEK | Heavy           | 521.3            | Unit       | 777.4          | Unit       | 380        | 17.1               | 19.4                      | 2                     |
| <i>APOC2</i> | TYLPAVDEK | Heavy           | 521.3            | Unit       | 664.4          | Unit       | 380        | 17.1               | 19.4                      | 2                     |
| <i>APOC2</i> | TYLPAVDEK | Heavy           | 521.3            | Unit       | 567.3          | Unit       | 380        | 17.1               | 19.4                      | 2                     |
| <i>C4A</i>   | VDFTLSSER | Light           | 527.3            | Unit       | 839.4          | Unit       | 380        | 17.3               | 20.5                      | 2                     |
| <i>C4A</i>   | VDFTLSSER | Light           | 527.3            | Unit       | 692.4          | Unit       | 380        | 17.3               | 20.5                      | 2                     |
| <i>C4A</i>   | VDFTLSSER | Light           | 527.3            | Unit       | 591.3          | Unit       | 380        | 17.3               | 20.5                      | 2                     |
| <i>C4A</i>   | VDFTLSSER | Heavy           | 530.3            | Unit       | 845.4          | Unit       | 380        | 17.3               | 20.5                      | 2                     |
| <i>C4A</i>   | VDFTLSSER | Heavy           | 530.3            | Unit       | 698.4          | Unit       | 380        | 17.3               | 20.5                      | 2                     |
| <i>C4A</i>   | VDFTLSSER | Heavy           | 530.3            | Unit       | 597.3          | Unit       | 380        | 17.3               | 20.5                      | 2                     |
| <i>DOCK2</i> | DILLPVITK | Light           | 506.3            | Unit       | 783.5          | Unit       | 380        | 16.7               | 23.5                      | 2                     |
| <i>DOCK2</i> | DILLPVITK | Light           | 506.3            | Unit       | 670.4          | Unit       | 380        | 16.7               | 23.5                      | 2                     |
| <i>DOCK2</i> | DILLPVITK | Light           | 506.3            | Unit       | 557.4          | Unit       | 380        | 16.7               | 23.5                      | 2                     |
| <i>DOCK2</i> | DILLPVITK | Heavy           | 509.8            | Unit       | 790.6          | Unit       | 380        | 16.7               | 23.5                      | 2                     |
| <i>DOCK2</i> | DILLPVITK | Heavy           | 509.8            | Unit       | 677.5          | Unit       | 380        | 16.7               | 23.5                      | 2                     |
| <i>DOCK2</i> | DILLPVITK | Heavy           | 509.8            | Unit       | 564.4          | Unit       | 380        | 16.7               | 23.5                      | 2                     |

|              |             |       |       |      |       |      |     |      |      |   |
|--------------|-------------|-------|-------|------|-------|------|-----|------|------|---|
| <i>LAMB1</i> | ISGVIGPYR   | Light | 481.3 | Unit | 848.5 | Unit | 380 | 15.9 | 20.0 | 2 |
| <i>LAMB1</i> | ISGVIGPYR   | Light | 481.3 | Unit | 761.4 | Unit | 380 | 15.9 | 20.0 | 2 |
| <i>LAMB1</i> | ISGVIGPYR   | Light | 481.3 | Unit | 605.3 | Unit | 380 | 15.9 | 20.0 | 2 |
| <i>LAMB1</i> | ISGVIGPYR   | Heavy | 482.8 | Unit | 851.5 | Unit | 380 | 15.9 | 20.0 | 2 |
| <i>LAMB1</i> | ISGVIGPYR   | Heavy | 482.8 | Unit | 764.4 | Unit | 380 | 15.9 | 20.0 | 2 |
| <i>LAMB1</i> | ISGVIGPYR   | Heavy | 482.8 | Unit | 608.3 | Unit | 380 | 15.9 | 20.0 | 2 |
| <i>LBP</i>   | ITLPDFTGDLR | Light | 624.3 | Unit | 920.4 | Unit | 380 | 20.4 | 23.5 | 2 |
| <i>LBP</i>   | ITLPDFTGDLR | Light | 624.3 | Unit | 823.4 | Unit | 380 | 20.4 | 23.5 | 2 |
| <i>LBP</i>   | ITLPDFTGDLR | Light | 624.3 | Unit | 708.4 | Unit | 380 | 20.4 | 23.5 | 2 |
| <i>LBP</i>   | ITLPDFTGDLR | Heavy | 625.8 | Unit | 923.5 | Unit | 380 | 20.4 | 23.5 | 2 |
| <i>LBP</i>   | ITLPDFTGDLR | Heavy | 625.8 | Unit | 826.4 | Unit | 380 | 20.4 | 23.5 | 2 |
| <i>LBP</i>   | ITLPDFTGDLR | Heavy | 625.8 | Unit | 711.4 | Unit | 380 | 20.4 | 23.5 | 2 |
| <i>CXCL7</i> | NIQSLEVIGK  | Light | 550.8 | Unit | 873.5 | Unit | 380 | 18.1 | 21.5 | 2 |
| <i>CXCL7</i> | NIQSLEVIGK  | Light | 550.8 | Unit | 745.4 | Unit | 380 | 18.1 | 21.5 | 2 |
| <i>CXCL7</i> | NIQSLEVIGK  | Light | 550.8 | Unit | 658.4 | Unit | 380 | 18.1 | 21.5 | 2 |
| <i>CXCL7</i> | NIQSLEVIGK  | Heavy | 552.3 | Unit | 876.5 | Unit | 380 | 18.1 | 21.5 | 2 |
| <i>CXCL7</i> | NIQSLEVIGK  | Heavy | 552.3 | Unit | 748.4 | Unit | 380 | 18.1 | 21.5 | 2 |
| <i>CXCL7</i> | NIQSLEVIGK  | Heavy | 552.3 | Unit | 661.4 | Unit | 380 | 18.1 | 21.5 | 2 |
| <i>VTDB</i>  | VLEPTLK     | Light | 400.2 | Unit | 587.3 | Unit | 380 | 13.4 | 18.6 | 2 |
| <i>VTDB</i>  | VLEPTLK     | Light | 400.2 | Unit | 458.3 | Unit | 380 | 13.4 | 18.6 | 2 |
| <i>VTDB</i>  | VLEPTLK     | Light | 400.2 | Unit | 361.2 | Unit | 380 | 13.4 | 18.6 | 2 |
| <i>VTDB</i>  | VLEPTLK     | Heavy | 403.8 | Unit | 594.4 | Unit | 380 | 13.4 | 18.6 | 2 |
| <i>VTDB</i>  | VLEPTLK     | Heavy | 403.8 | Unit | 465.3 | Unit | 380 | 13.4 | 18.6 | 2 |

|             |         |       |       |      |       |      |     |      |      |   |
|-------------|---------|-------|-------|------|-------|------|-----|------|------|---|
| <i>VTDB</i> | VLEPTLK | Heavy | 403.8 | Unit | 368.3 | Unit | 380 | 13.4 | 18.6 | 2 |
| <i>VTDB</i> | VLEPTLK | Heavy | 403.8 | Unit | 368.3 | Unit | 380 | 13.4 | 18.6 | 2 |

---

APOC2, apolipoprotein C-II; C4A, complement component 4A; DOCK2, dedicator of cytokinesis 2; LAMB1, laminin  $\beta$ 1 subunit; LBP, human lipopolysaccharide-binding protein; CXCL7, Chemokine (C-X-C motif) ligand 7; VTDB, vitamin D binding protein. \*Delta Ret Time means the time window for scheduled SRM



**Figure S1.** Quantification of candidate biomarkers via label-free multiple reaction monitoring (MRM) analysis for verification of differentially expressed proteins

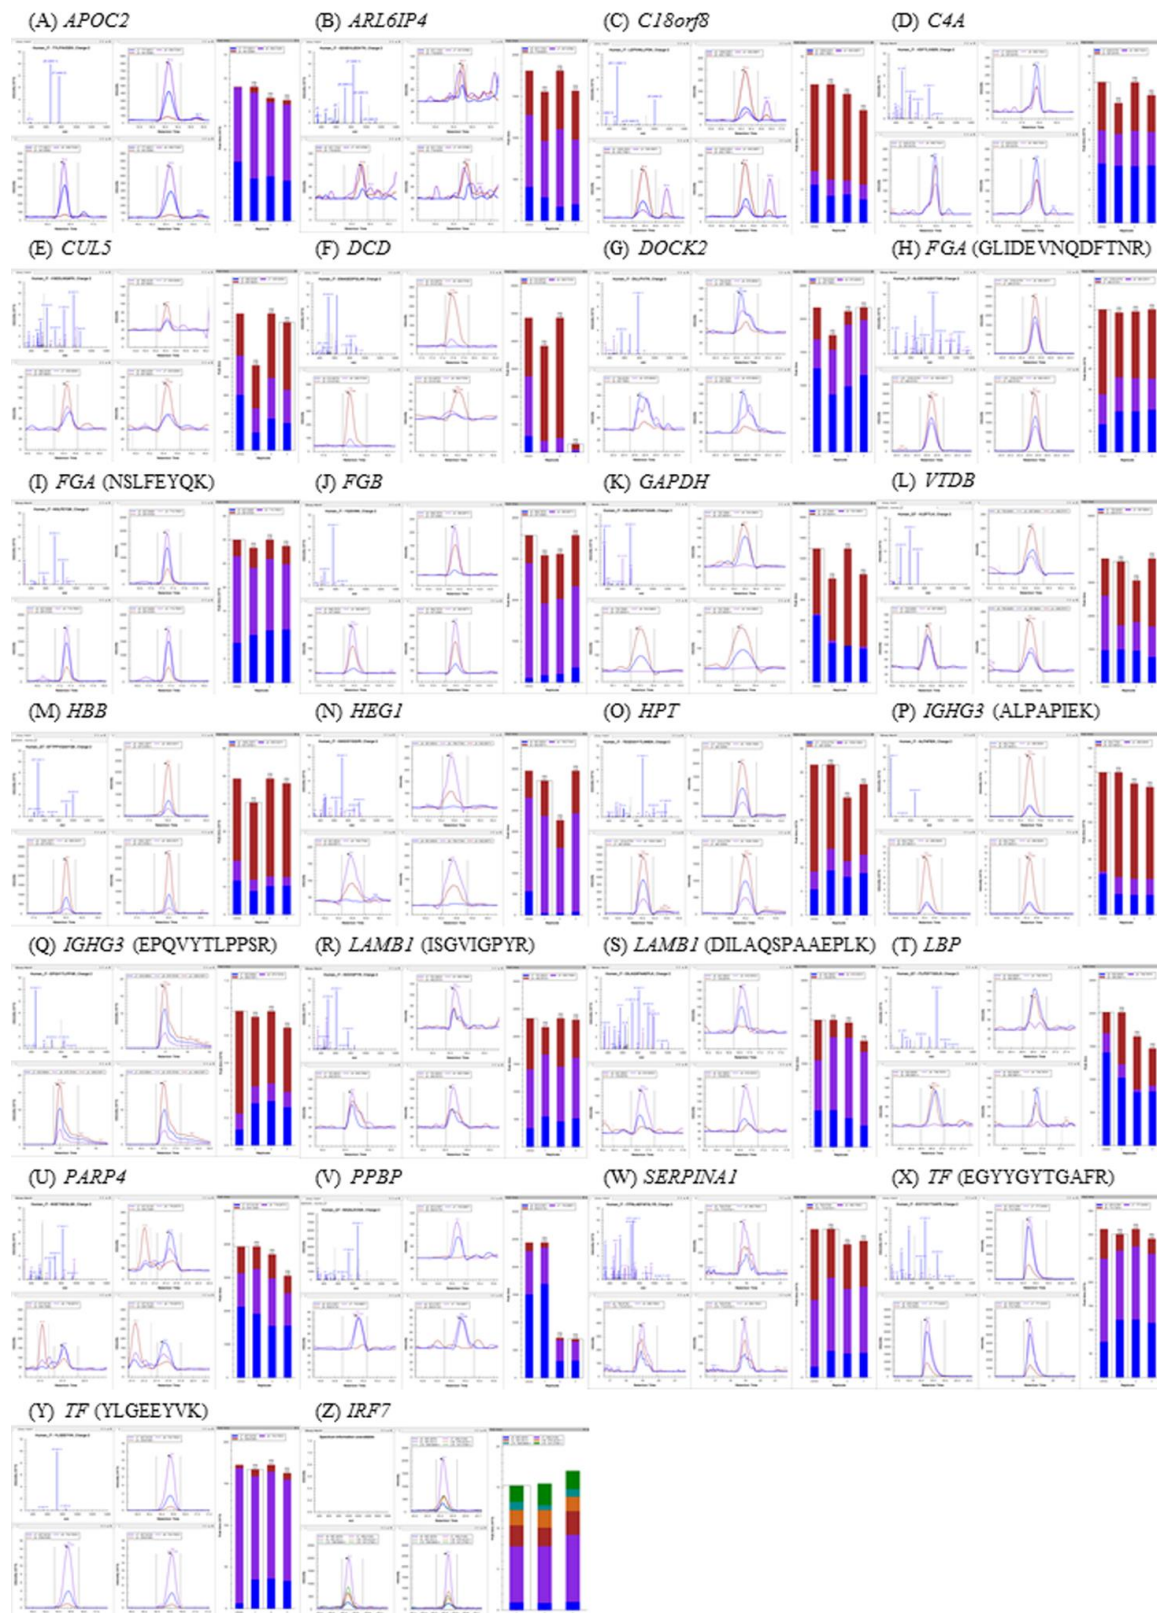

**Figure S2.** The concentration curve of SI peptides using multiple reaction monitoring (MRM) analysis with isotopically labeled peptides.

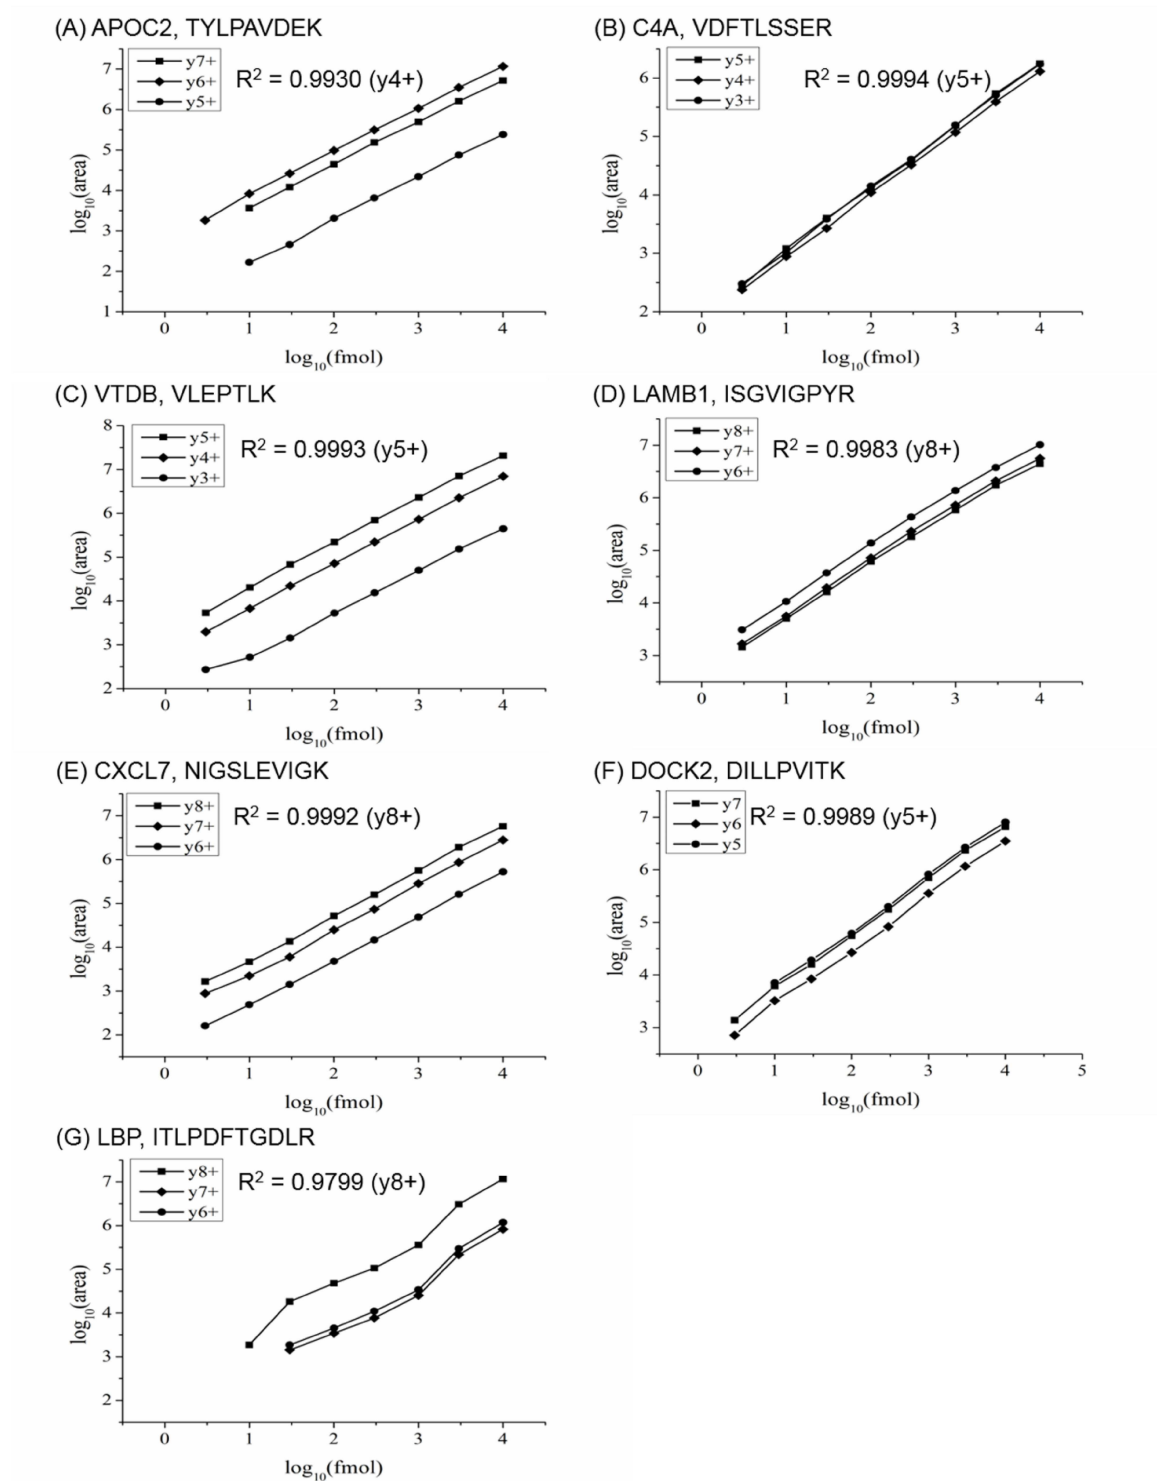

Supplement: bmjdrc-2019-001152supp001.pdf [file bmjdrc-2019-001152supp001.pdf]
